# Supplementary material for: Breaking the scaling relations of effective CO2 electrochemical reduction in diatomic catalysts by adjusting the flow direction of intermediate structures
Source: Royal Society of Chemistry journal article supplement (doi:10.1039/d4sc03085k), 2024-01-01
Supplement: d4sc03085k1.pdf [file d4sc03085k1.pdf]

## Supporting Information

Breaking the scaling relations of effective CO<sub>2</sub> electrochemical reduction in diatomic catalysts by adjusting the flow direction of intermediate structures

Yanwen Zhang, <sup>†a,b</sup> Zhaoqun Yao, <sup>†c</sup> YiMing Yang, <sup>b</sup> Xingwu Zhai, <sup>d</sup> Feng Zhang, <sup>e</sup> Zhirong Guo, <sup>b</sup> Xinghuan Liu, <sup>a</sup> Bin Yang, <sup>a</sup> Yunxia Liang, <sup>b</sup> Guixian Ge <sup>\*b</sup> and Xin Jia <sup>\*a</sup>

School of Chemistry and Chemical Engineering/State Key Laboratory Incubation Base for Green Processing of Chemical Engineering, Shihezi University, Shihezi 832003, China,  
Email:jiaxin@shzu.edu.cn

### Details of adsorption energy calculation:

Based on the theory of Nørskov et al., we calculate the binding energy of the metal active center of diatomic catalyst adsorbing intermediates \*CO, \*COOH and \*HCOO with the following equation:<sup>1</sup>

$$E_b(\text{CO}) = E(*\text{CO}) + \Delta E_{\text{sol}}(\text{CO}) - E^* - E(\text{CO}(\text{g}))$$

$$E_b(\text{COOH}) = E(*\text{COOH}) + \Delta E_{\text{sol}}(\text{COOH}) - E^* - E(\text{CO}_2(\text{g})) - 1/2E(\text{H}_2)$$

$$E_b(\text{CHO}) = E(*\text{CHO}) + \Delta E_{\text{sol}}(\text{CHO}) - E^* - E(\text{CO}(\text{g})) - 1/2E(\text{H}_2)$$

$E_b(\text{CO})$ ,  $E_b(\text{COOH})$ , and  $E_b(\text{CHO})$  are the binding energies of \*CO, \*COOH, and \*CHO, respectively.

The  $\Delta E_{\text{sol}}$  indicates a solvation correction to binding energy. For \*CO, \*COOH, and \*CHO, the solvation correction is -0.1 eV, -0.25 eV and -0.1 eV, respectively.

where  $\Delta E_{\text{sol}}$  represents the solvation correction. Here we considered constant solvation correction, which was assigned as -0.1 eV and -0.25 eV for \*CO and \*COOH, respectively.

### References

- (1) K. Chan, C. Tsai, H. A. Hansen and J. K. Nørskov, ChemCatChem, 2014, 6, 1899-1905.

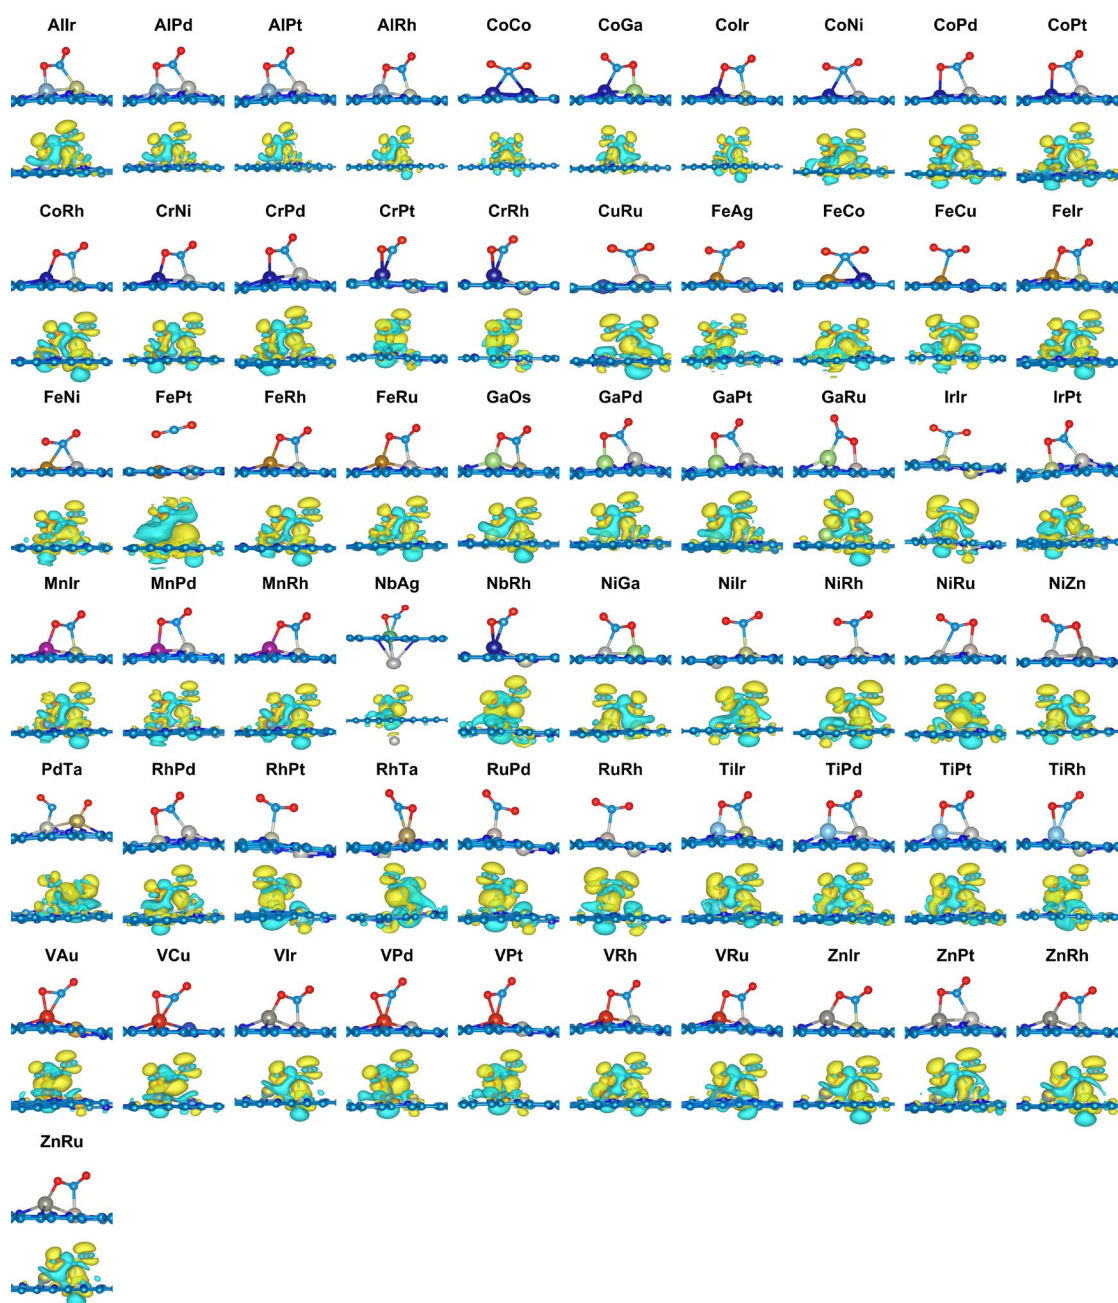

Figure S1. Optimized adsorption configurations and charge density differences for chemisorbed CO<sub>2</sub> on 61 different M1M2-N6@Gra surfaces.

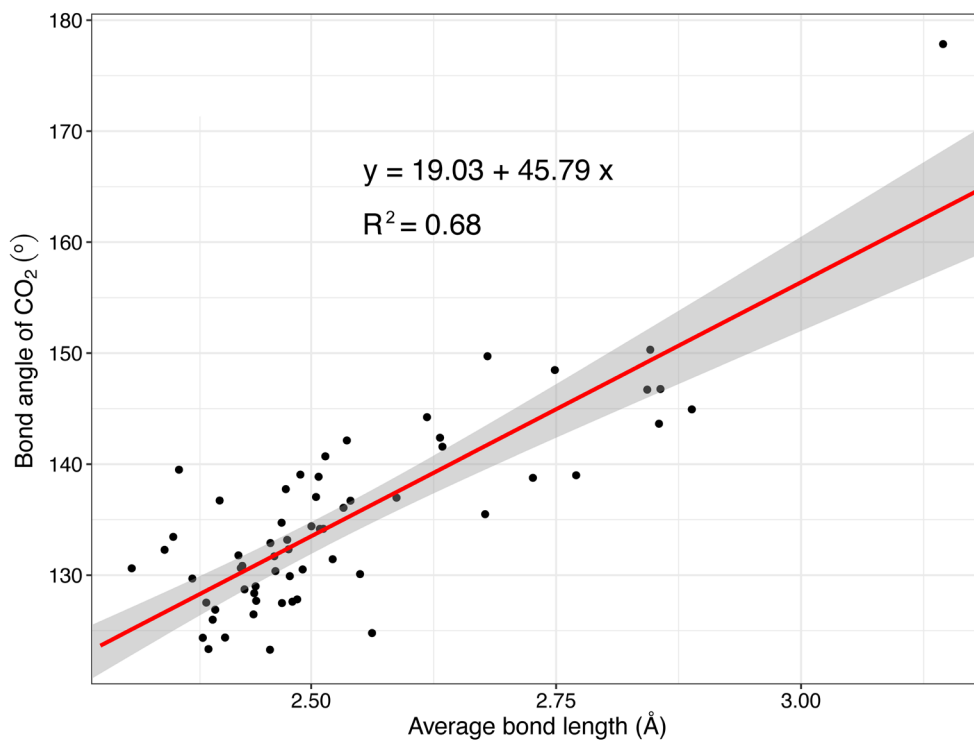

Figure S2. Linear relationship and Pearson coefficients between activation angles and average bond lengths.

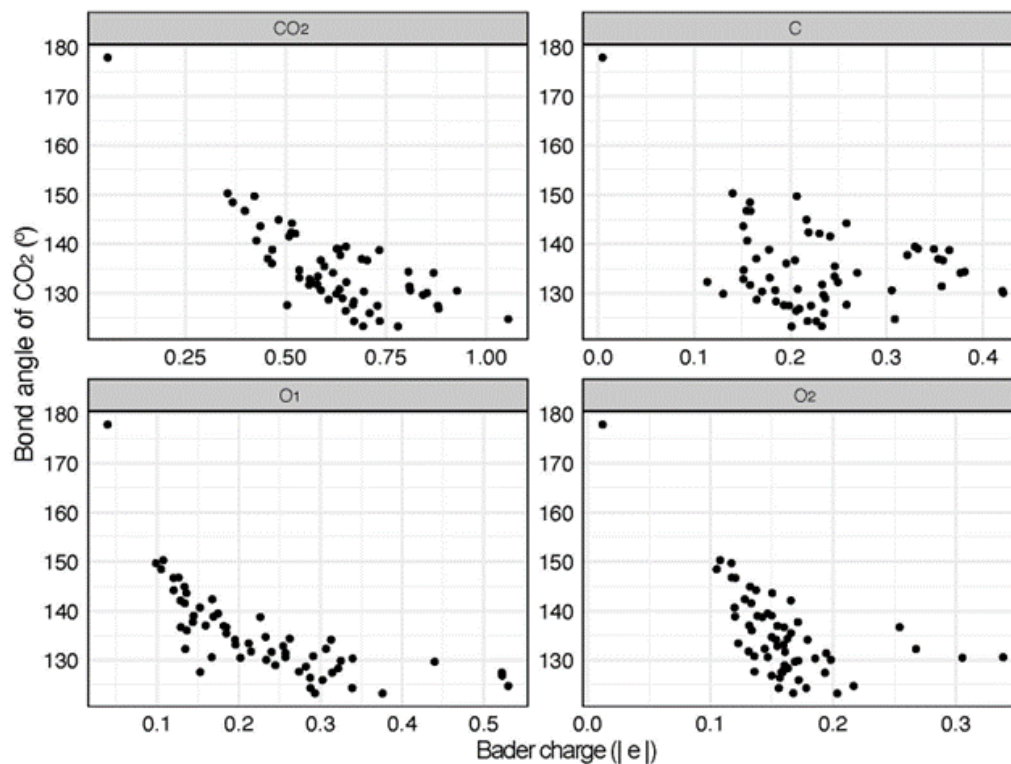

Figure S3. (a) Activation angles of CO<sub>2</sub> molecules chemisorbed on M1M2-N6@Gra surfaces correlated with (a) Bader charge of CO<sub>2</sub>, (b) Bader charge of carbon atoms in CO<sub>2</sub>, (c) Bader charge of O1, and (d) Bader charge of O2.

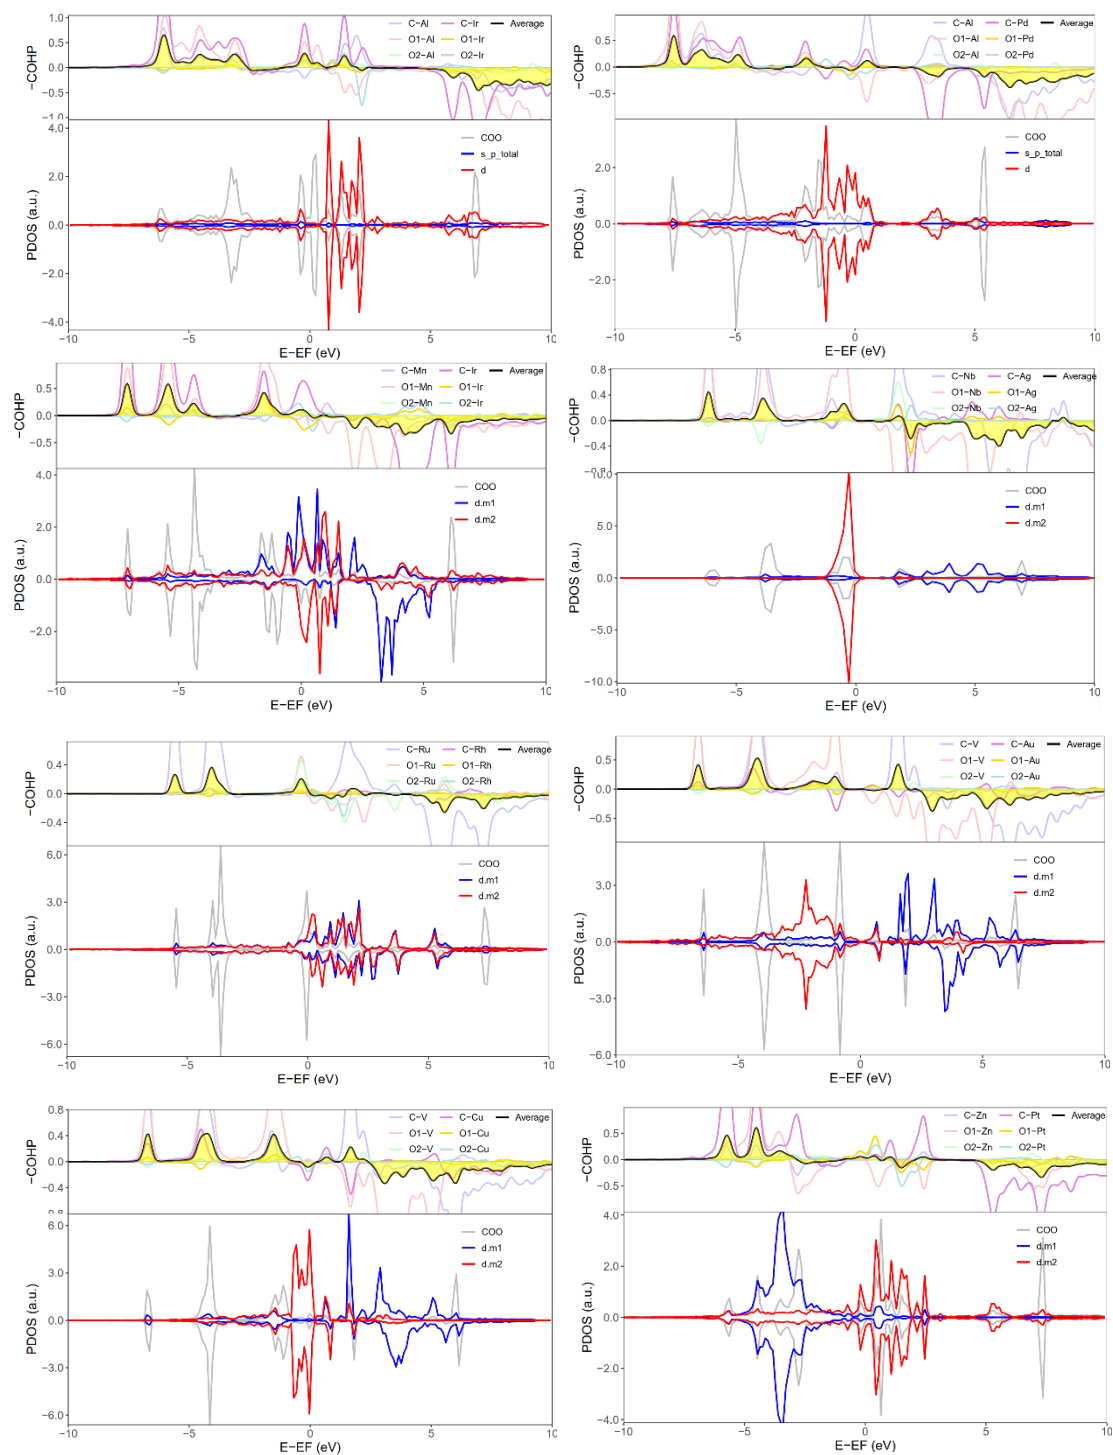

Figure S4. PDOS and COHP for CO<sub>2</sub> adsorption on M1M2-N6@Gra (M1M2=AlIr, APd, MnIr, NbAg, RuRu, VAu, VCu, ZnPt) surfaces. The Fermi level is set at 0 eV. Positive COHP indicates bonding states and negative indicates antibonding states; colored lines are COHP between two metal atoms and C, O1, and O2 atoms, with black representing average COHP.

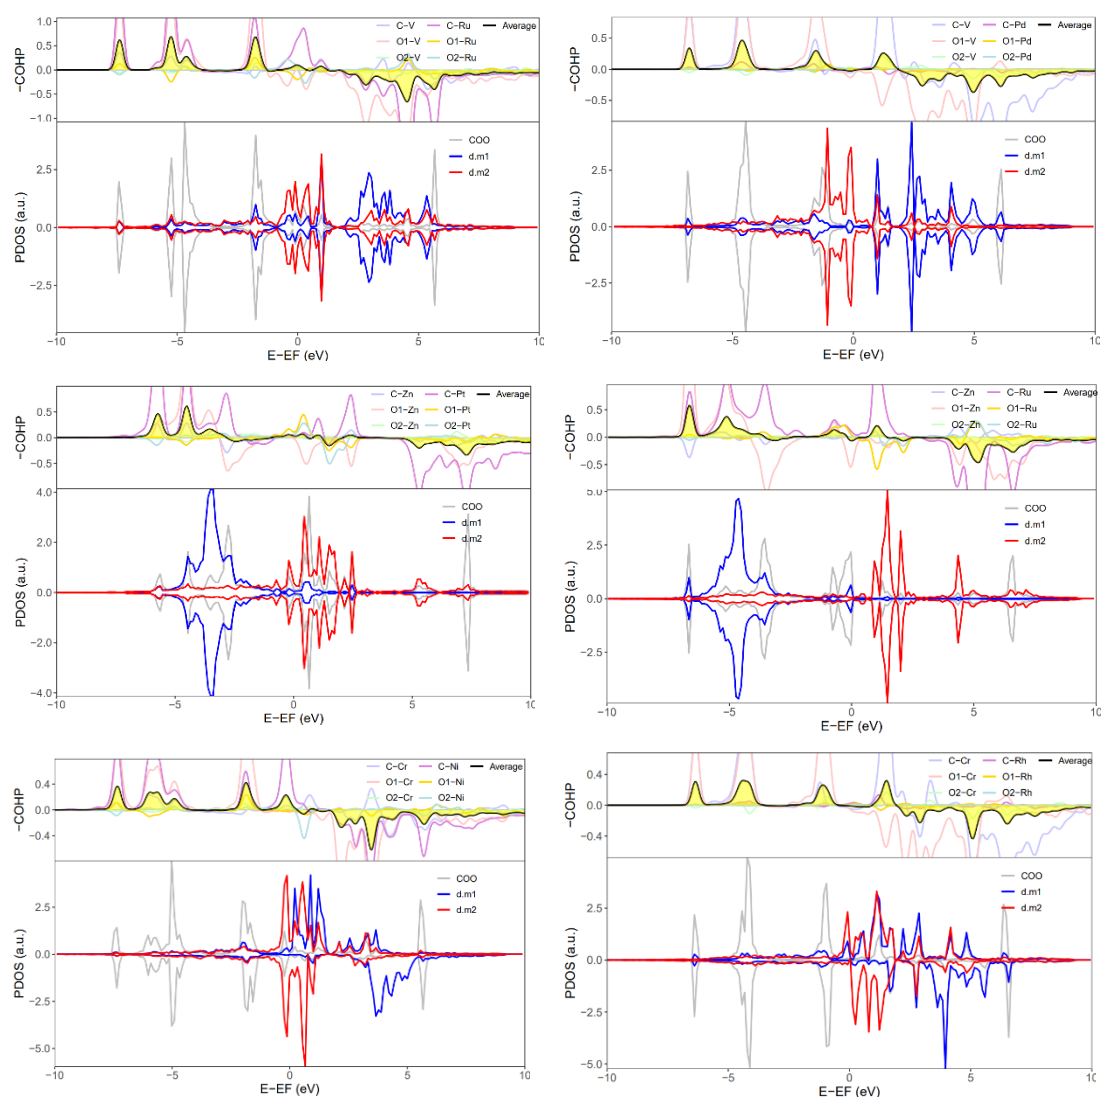

Figure S5. PDOS and COHP for CO<sub>2</sub> adsorption on M1M2-N6@Gra (M1M2=VRu, VPd, ZnPt, ZnRu, CrNi, CrRh) surfaces. The Fermi level is set at 0 eV. Positive COHP indicates bonding states and negative indicates antibonding states; colored lines are COHP between two metal atoms and C, O1, and O2 atoms, with black representing average COHP.

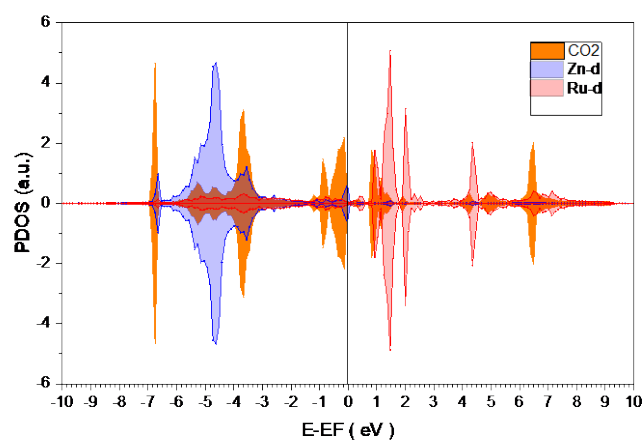

Figure S6. PDOS for CO<sub>2</sub>, Zn, and Ru atoms after CO<sub>2</sub> adsorption on ZnRu-N6@Gra.

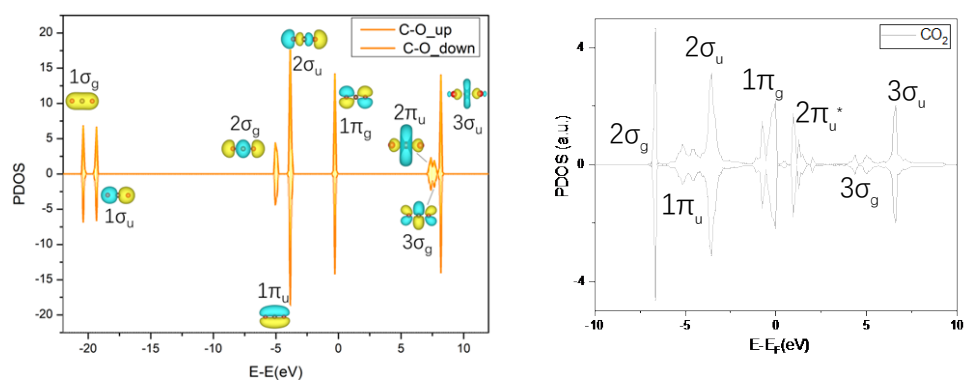

Figure S7. (a) PDOS of a free CO<sub>2</sub> molecule. (b) PDOS of CO<sub>2</sub> after adsorption. The Fermi level is set at 0 eV.

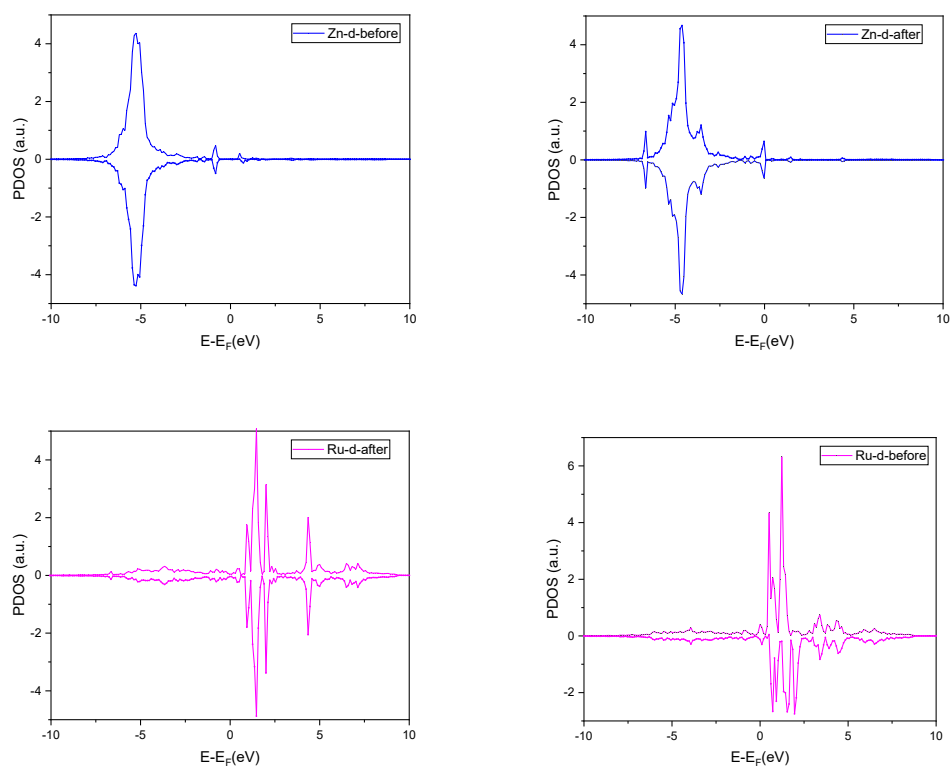

Figure S8. Calculated partial density of states (PDOS) for d electrons on ZnRu-N6@Gra surfaces before and after CO<sub>2</sub> adsorption.

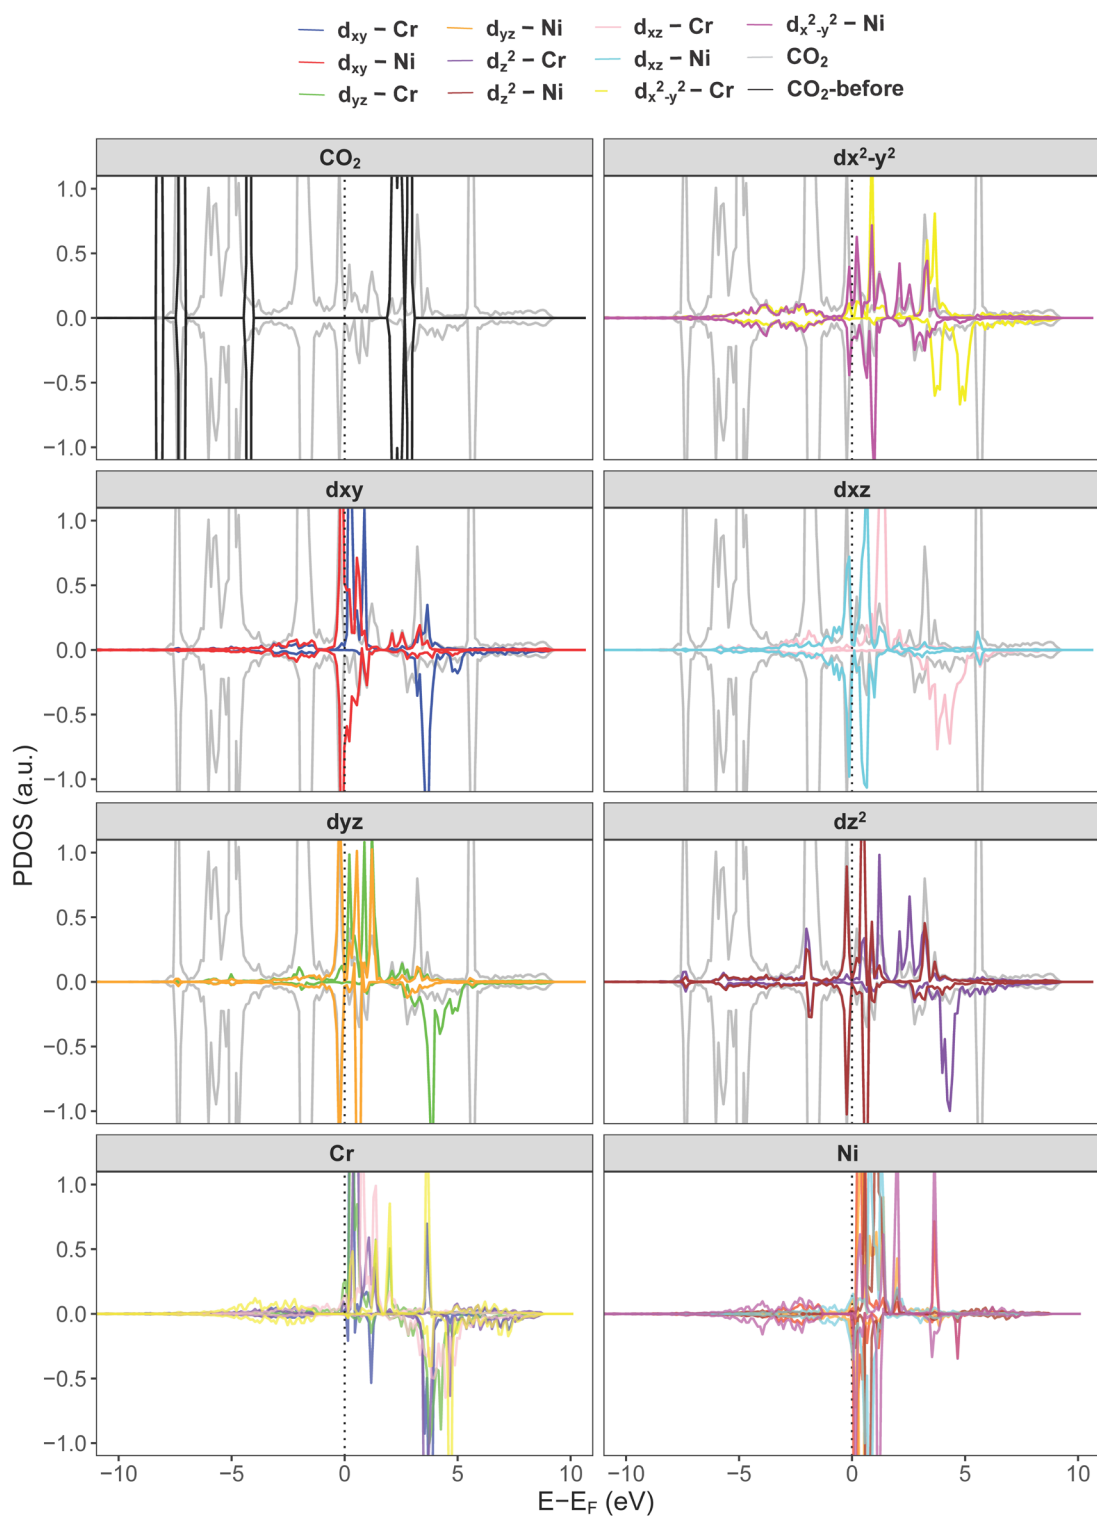

Figure S9. PDOS calculations for Cr and Ni d orbitals in CrNi-N6@Gra before and after CO<sub>2</sub> adsorption. The Fermi level is set at 0 eV.



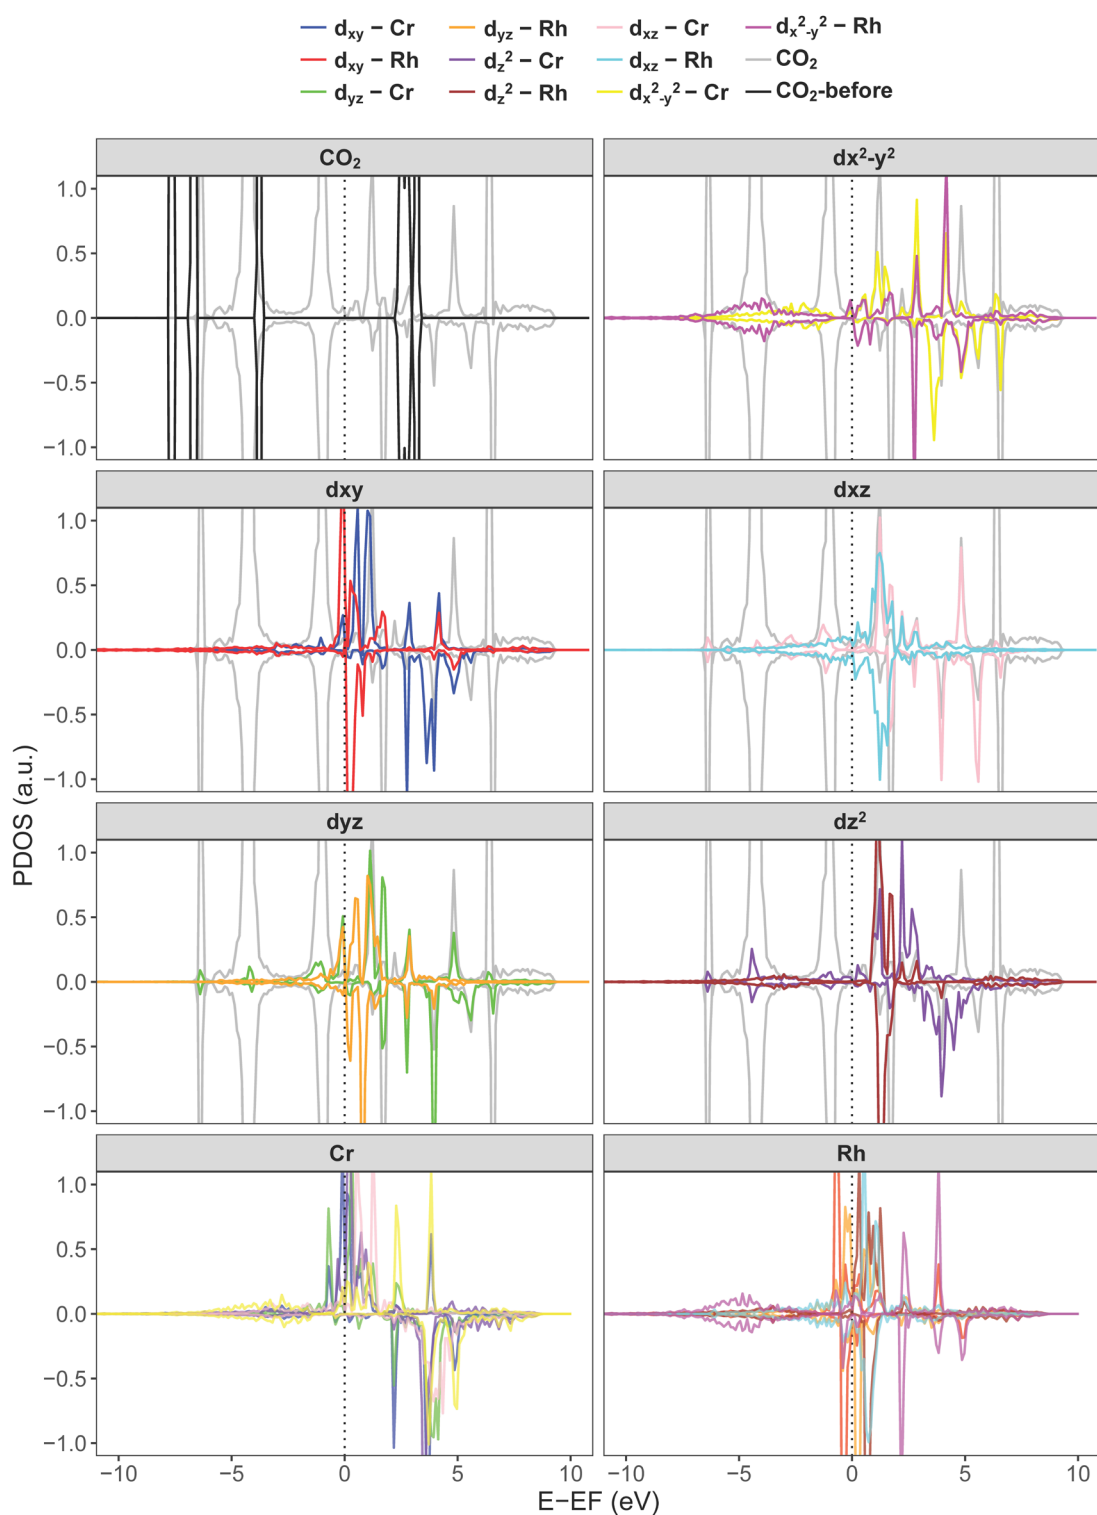

Figure S10. PDOS calculations for Cr and Rh d orbitals in CrRh-N6@Gra before and after CO<sub>2</sub> adsorption. The Fermi level is set at 0 eV.

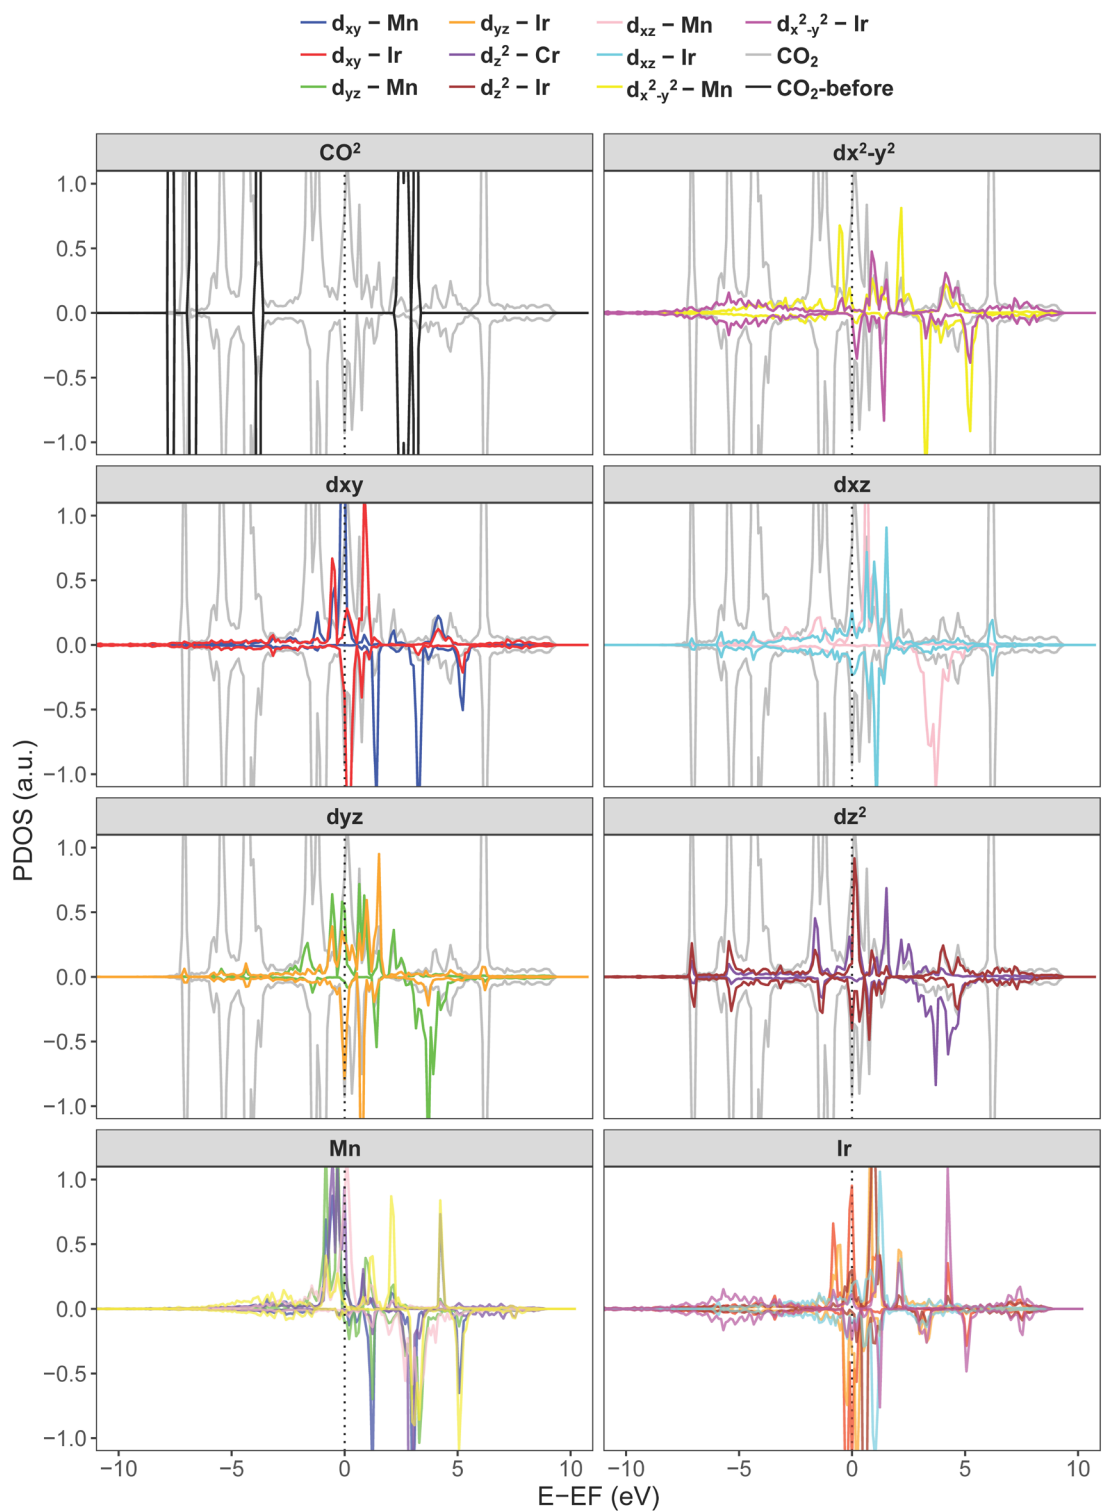

Figure S11. PDOS calculations for Mn and Ir d orbitals in MnIr-N6@Gra before and after CO<sub>2</sub> adsorption. The Fermi level is set at 0 eV.

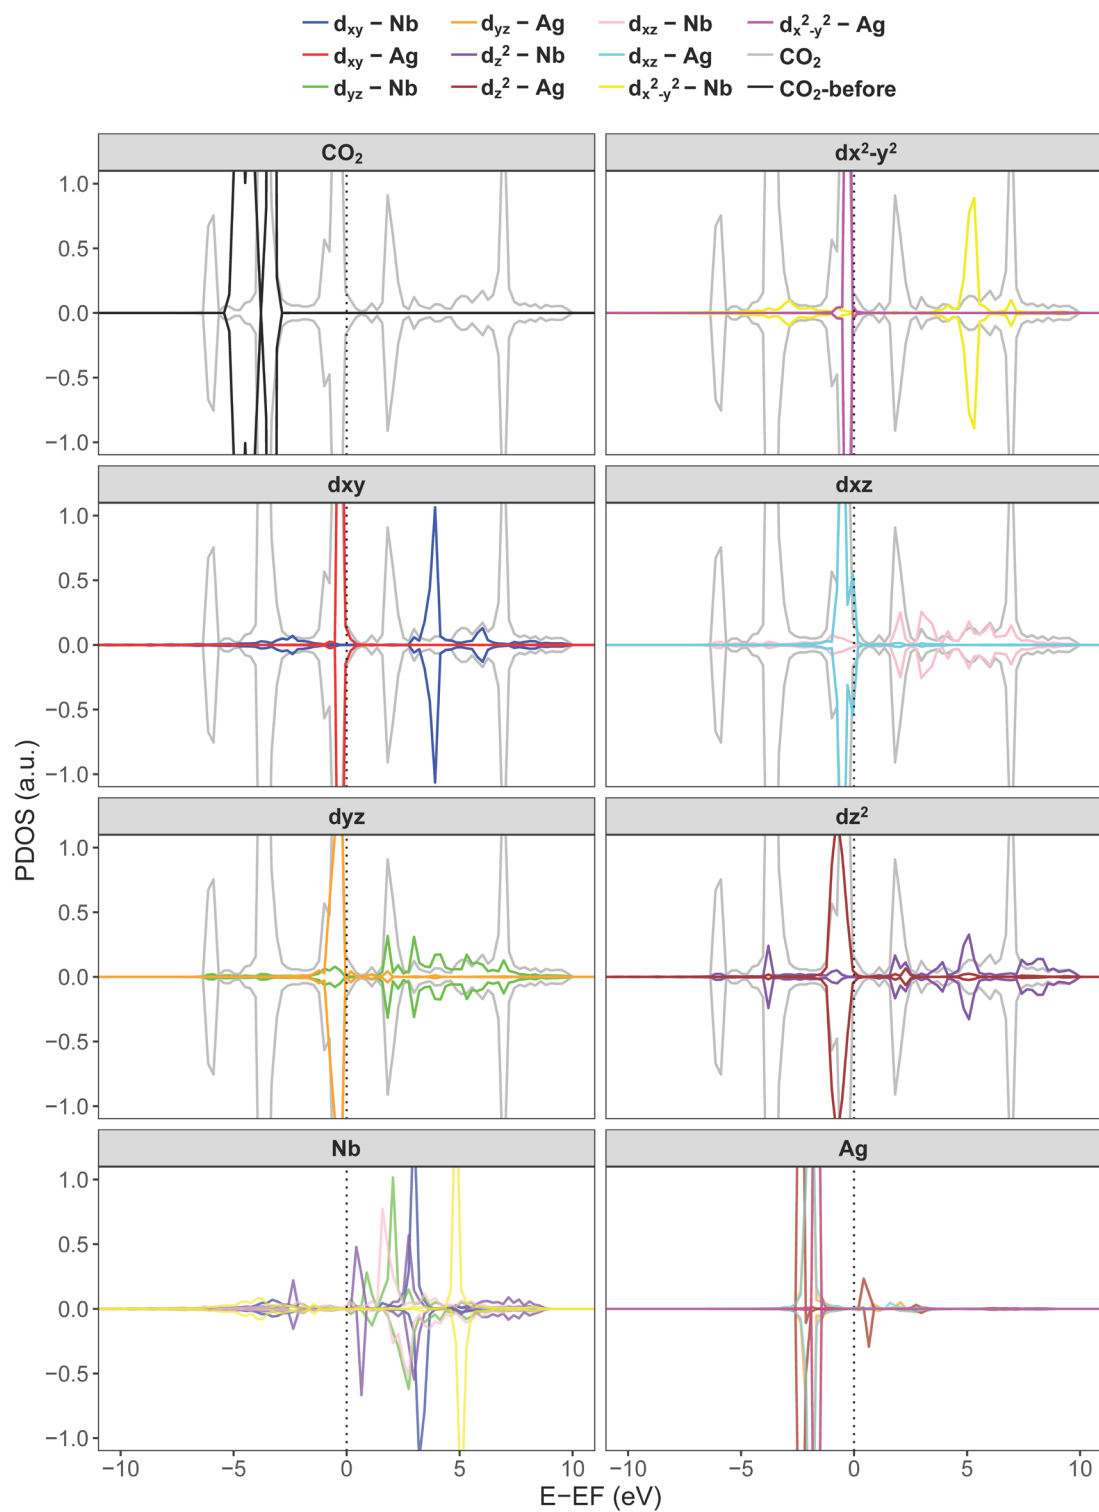

Figure S12. PDOS calculations for Nb and Ag d orbitals in NbAg-N6@Gra before and after  $CO_2$  adsorption. The Fermi level is set at 0 eV

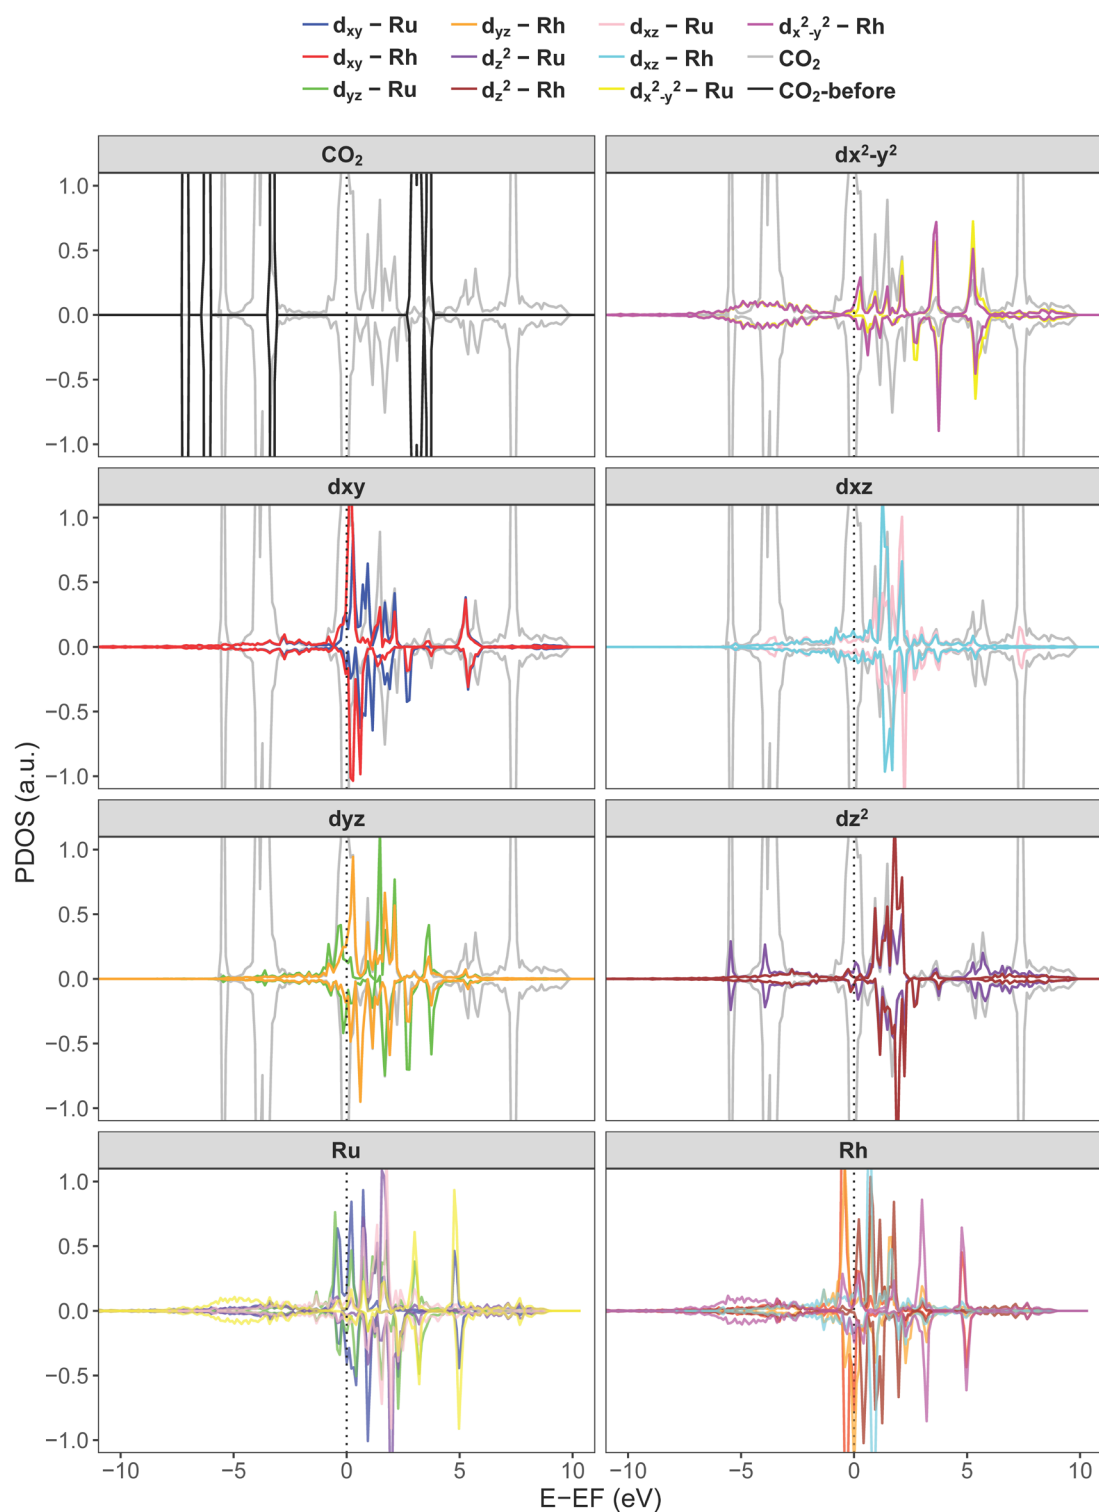

Figure S13. PDOS calculations for Ru and Rh d orbitals in RuRh-N6@Gra before and after  $CO_2$  adsorption. The Fermi level is set at 0 eV.

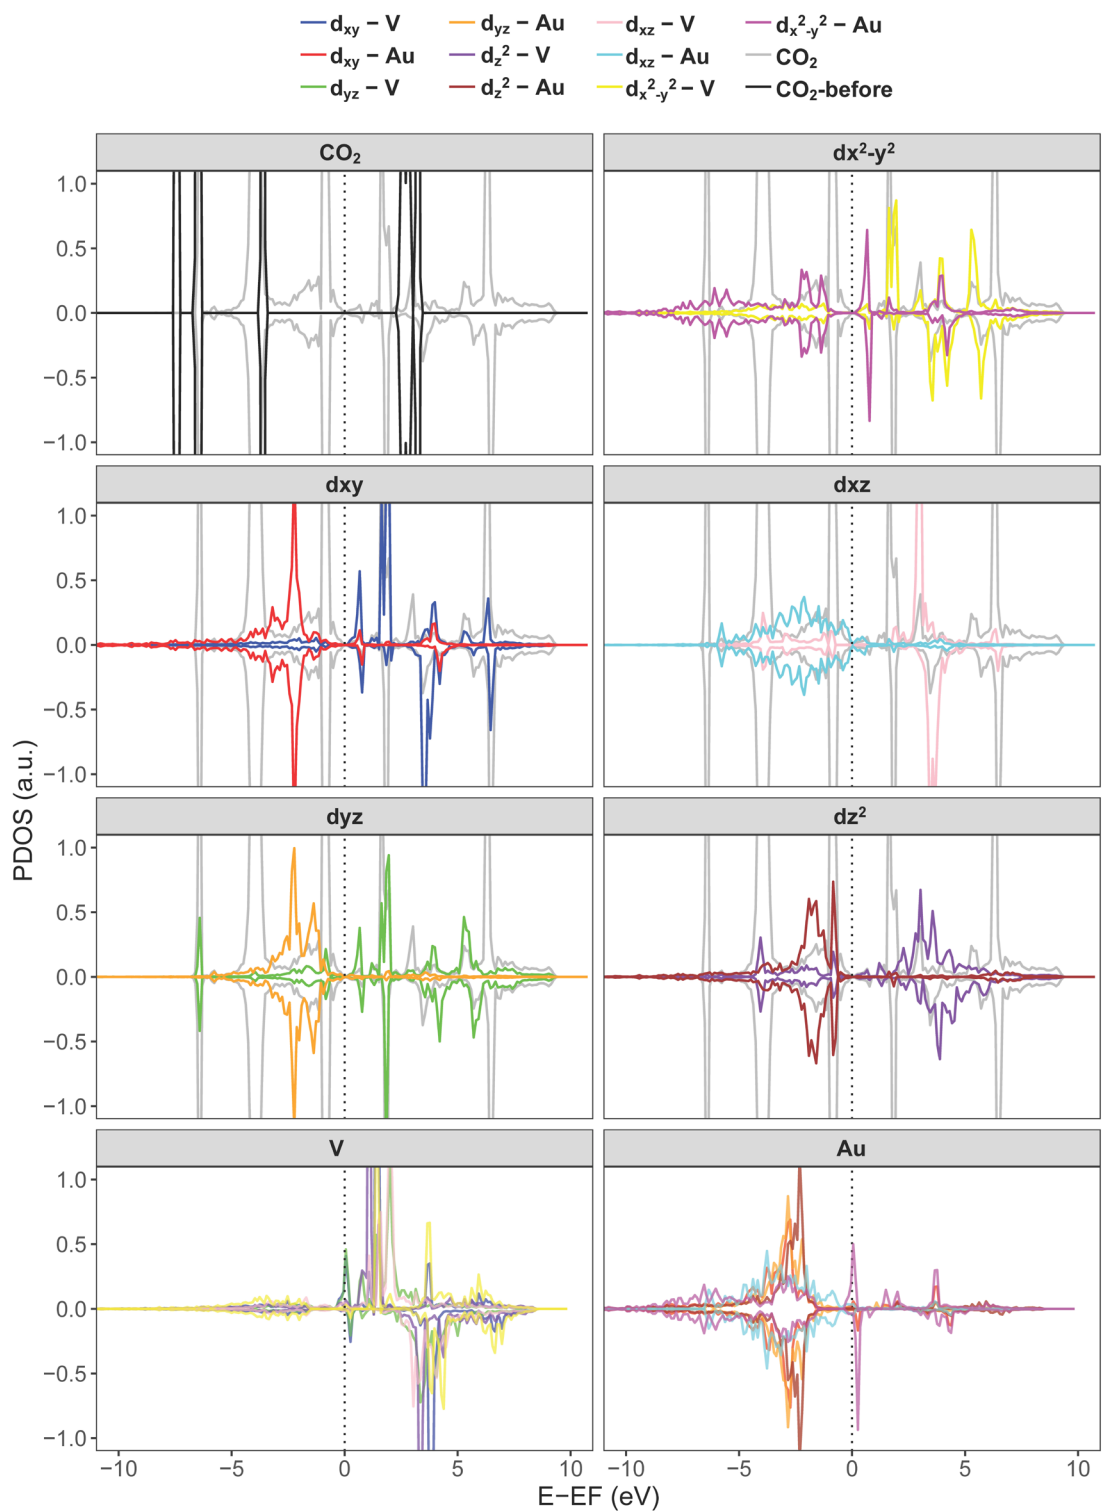

Figure S14. PDOS calculations for V and Au d orbitals in VAu-N6@Gra before and after CO<sub>2</sub> adsorption. The Fermi level is set at 0 eV.

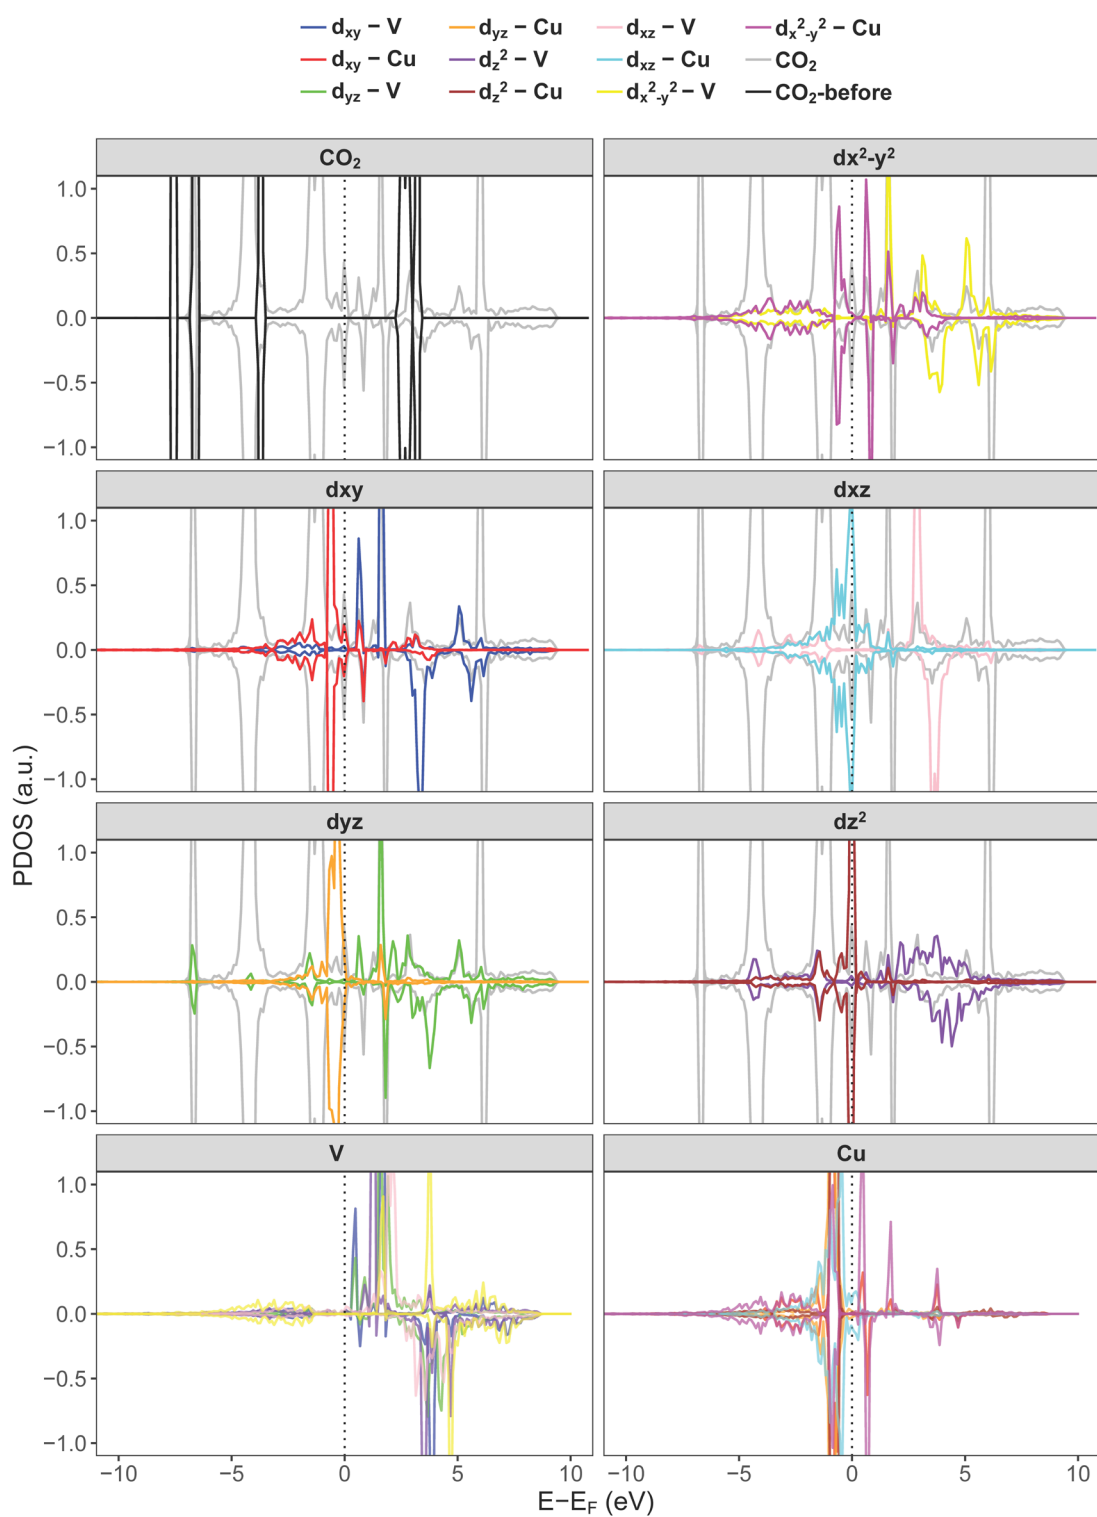

Figure S15. PDOS calculations for V and Cu d orbitals in VCu-N6@Gra before and after CO<sub>2</sub> adsorption. The Fermi level is set at 0 eV.

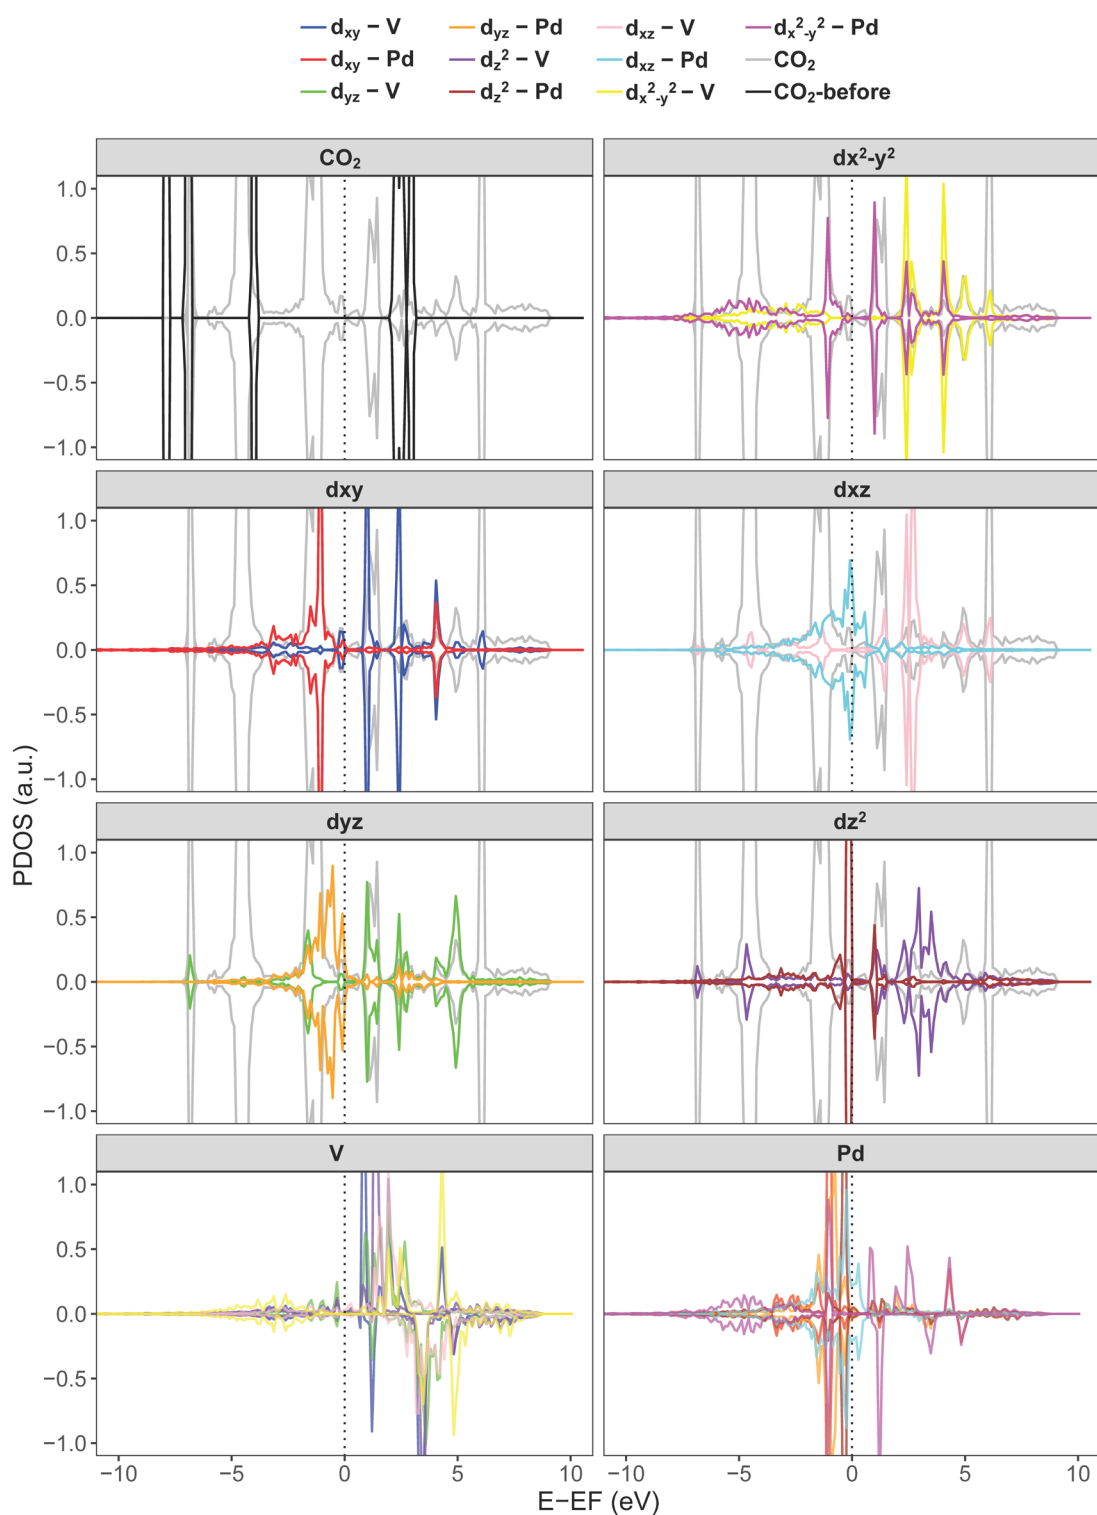

Figure S16. PDOS calculations for V and Pd d orbitals in VPd-N6@Gra before and after CO<sub>2</sub> adsorption. The Fermi level is set at 0 eV.

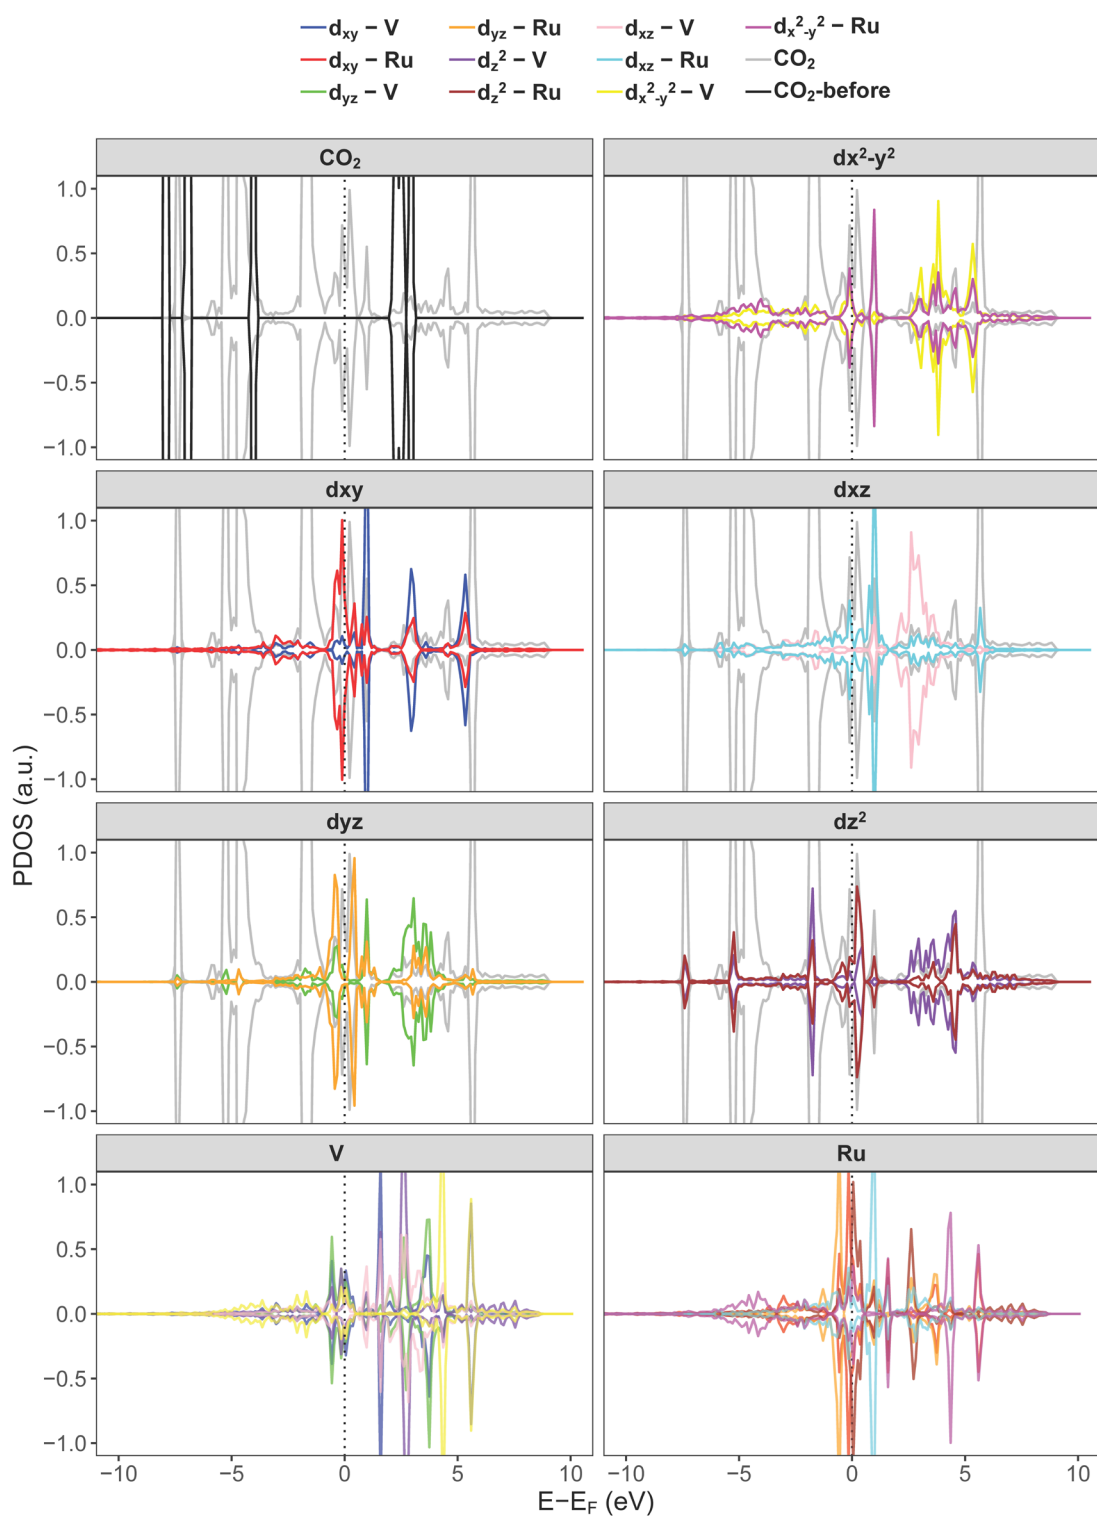

Figure S17. PDOS calculations for V and Ru d orbitals in VRu-N6@Gra before and after CO<sub>2</sub> adsorption. The Fermi level is set at 0 eV.



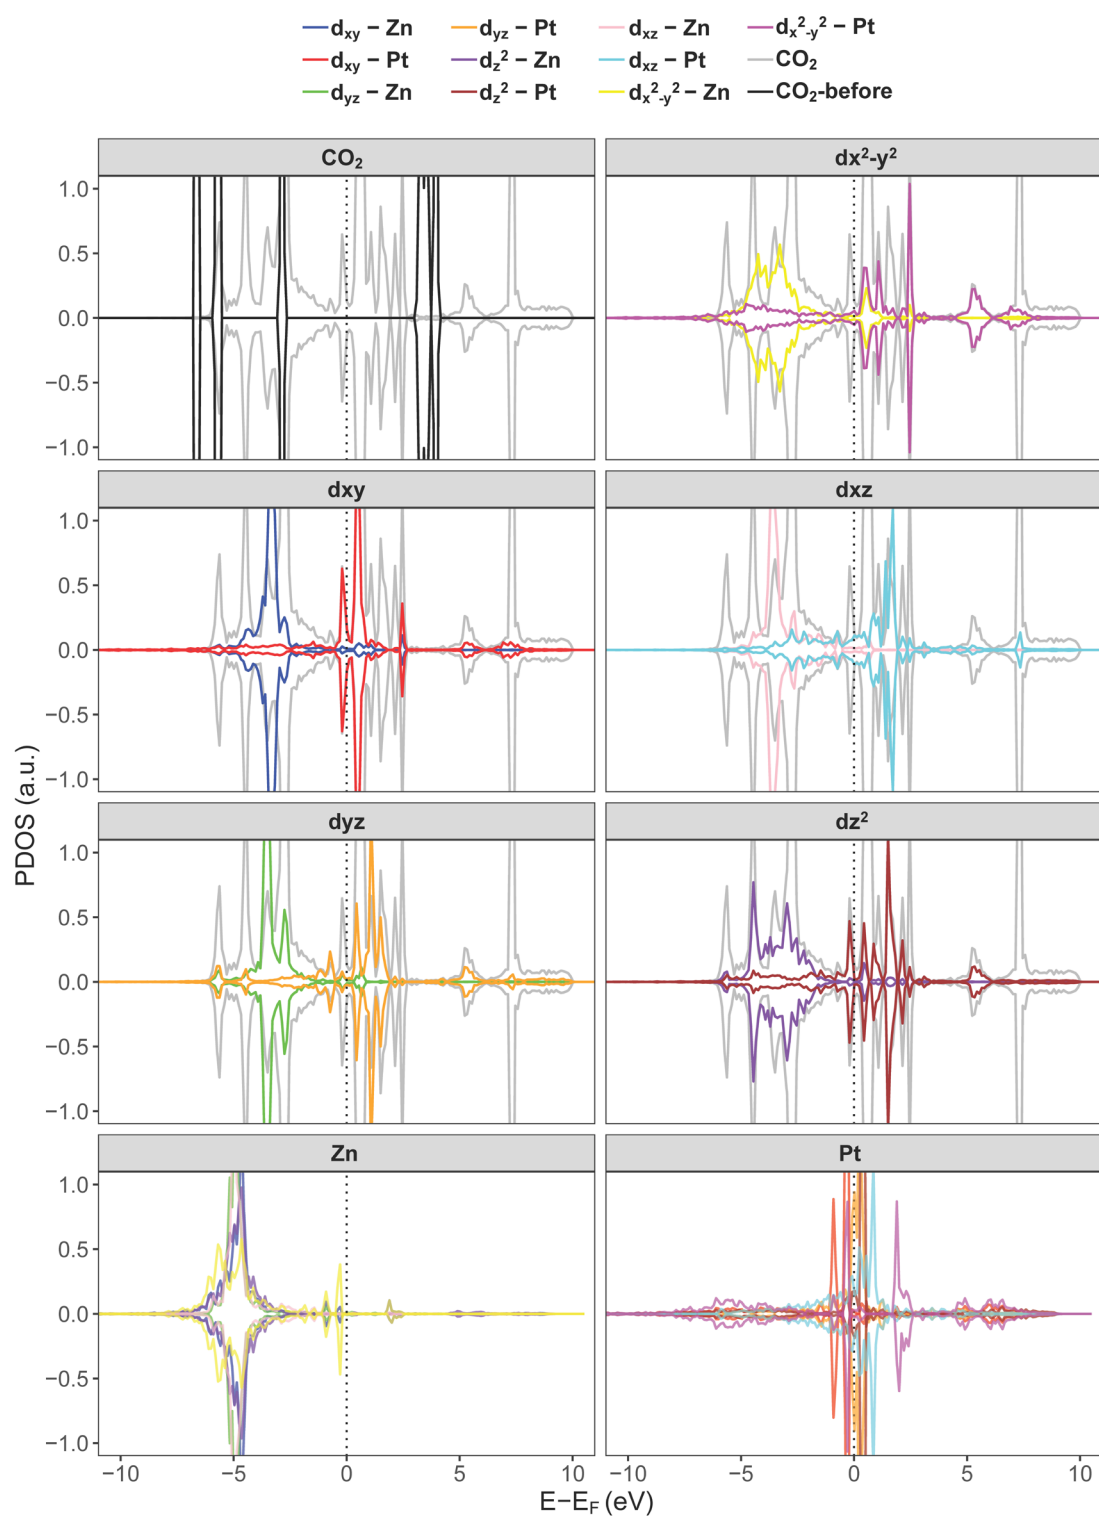

Figure S18. PDOS calculations for Zn and Pt d orbitals in ZnPt-N6@Gra before and after  $CO_2$  adsorption. The Fermi level is set at 0 eV.

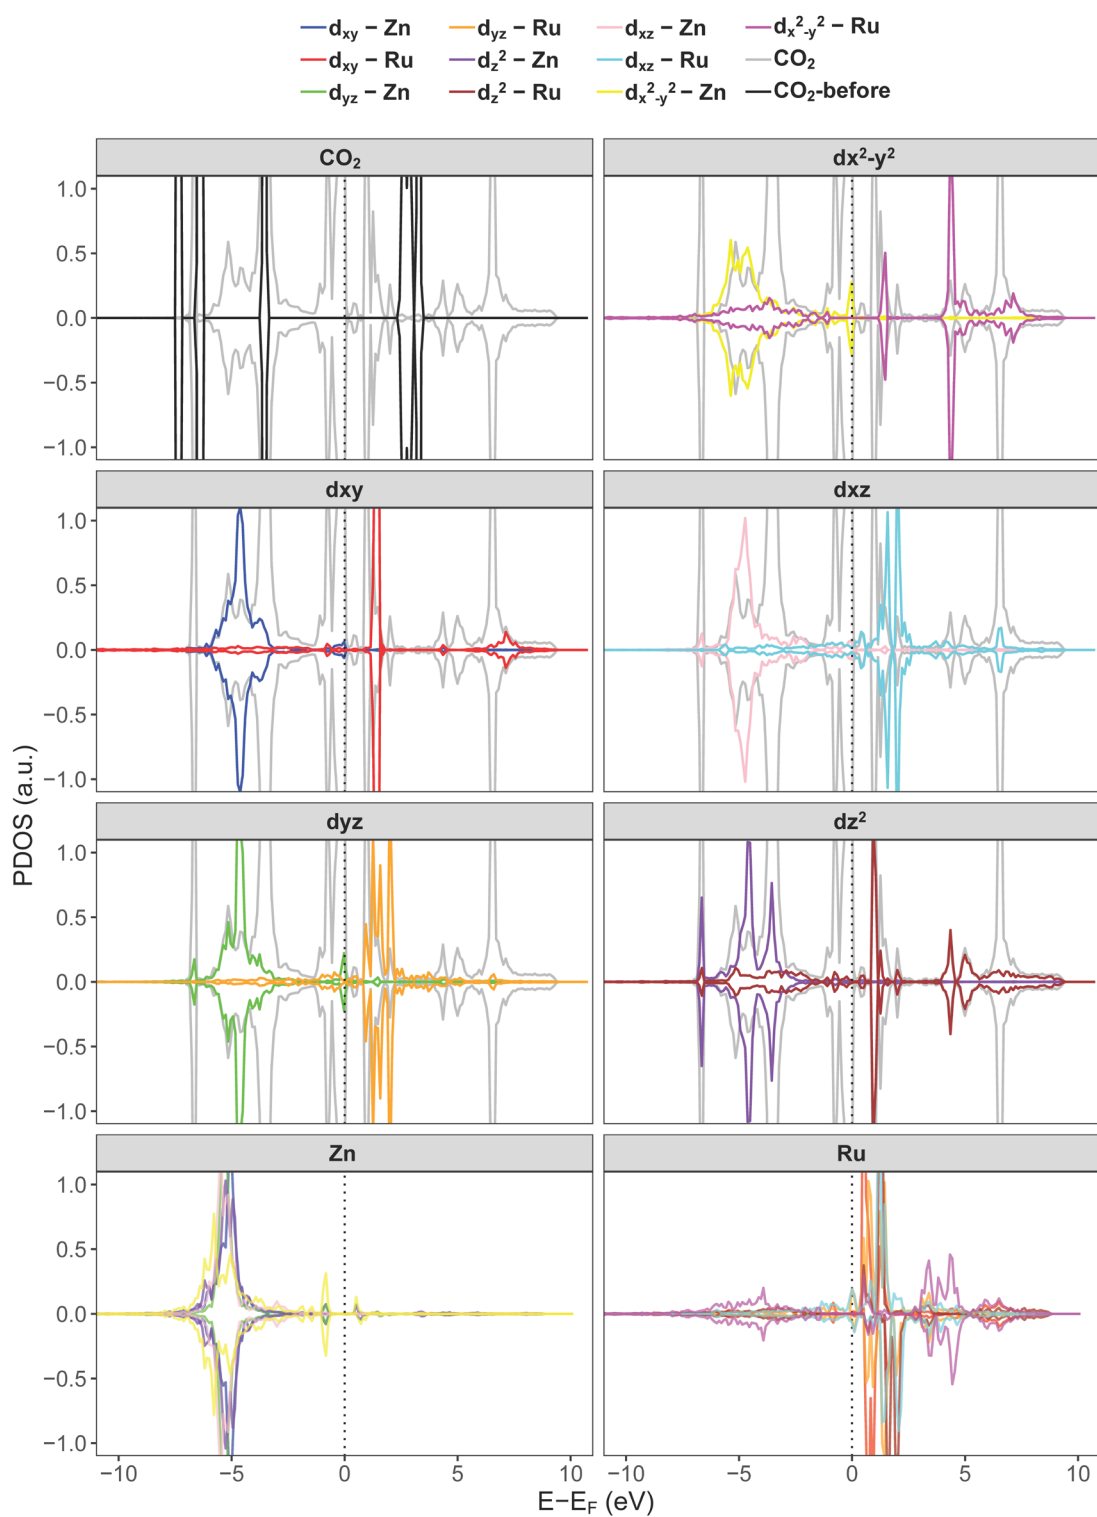

Figure S19. PDOS calculations for Zn and Ru d orbitals in ZnRu-N6@Gra before and after  $CO_2$  adsorption. The Fermi level is set at 0 eV.

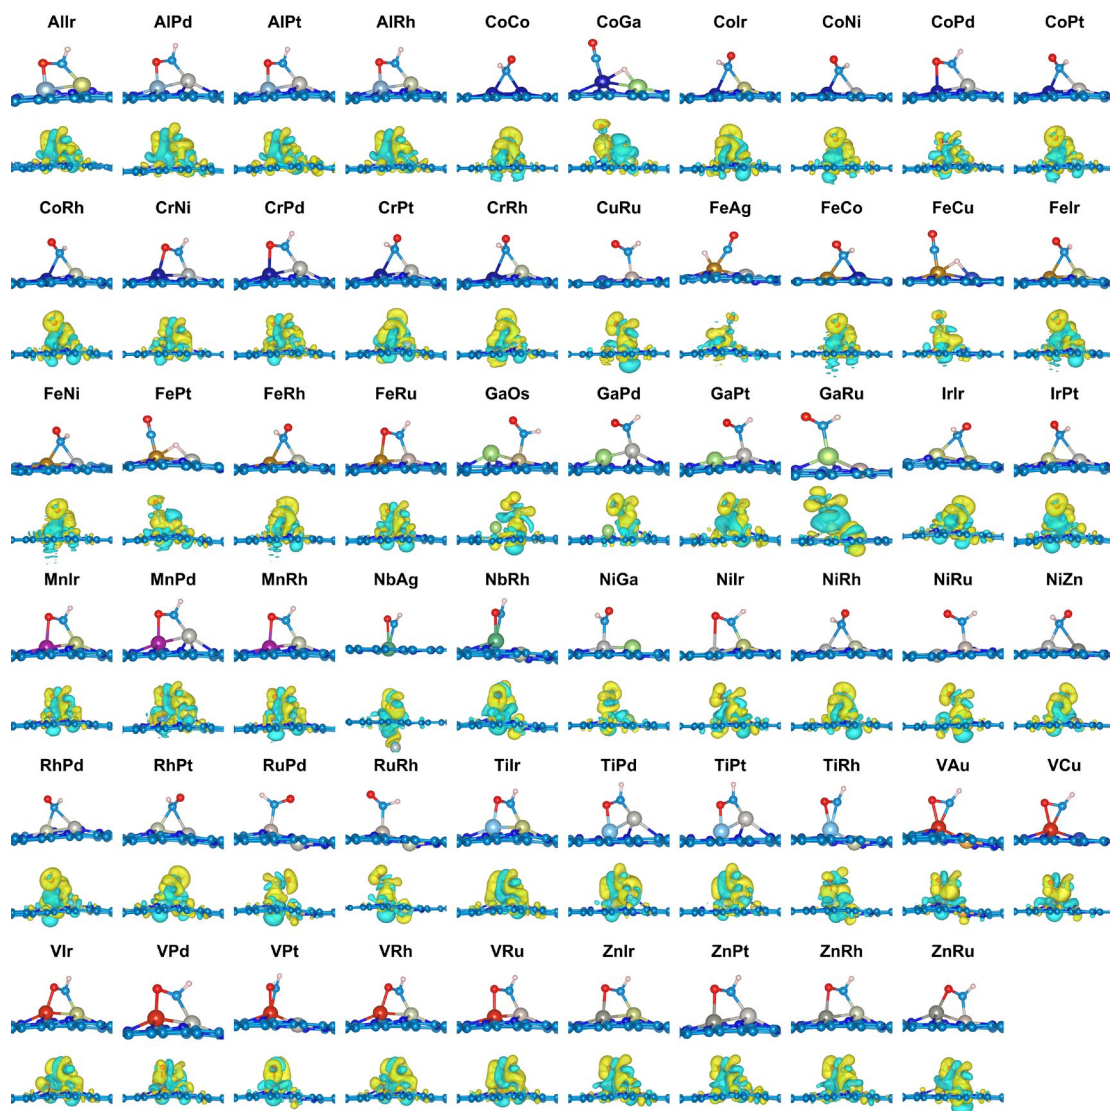

Figure S20. Optimized adsorption configurations and charge density differences for chemisorbed \*CHO on 59 different M1M2-N6@Gra.

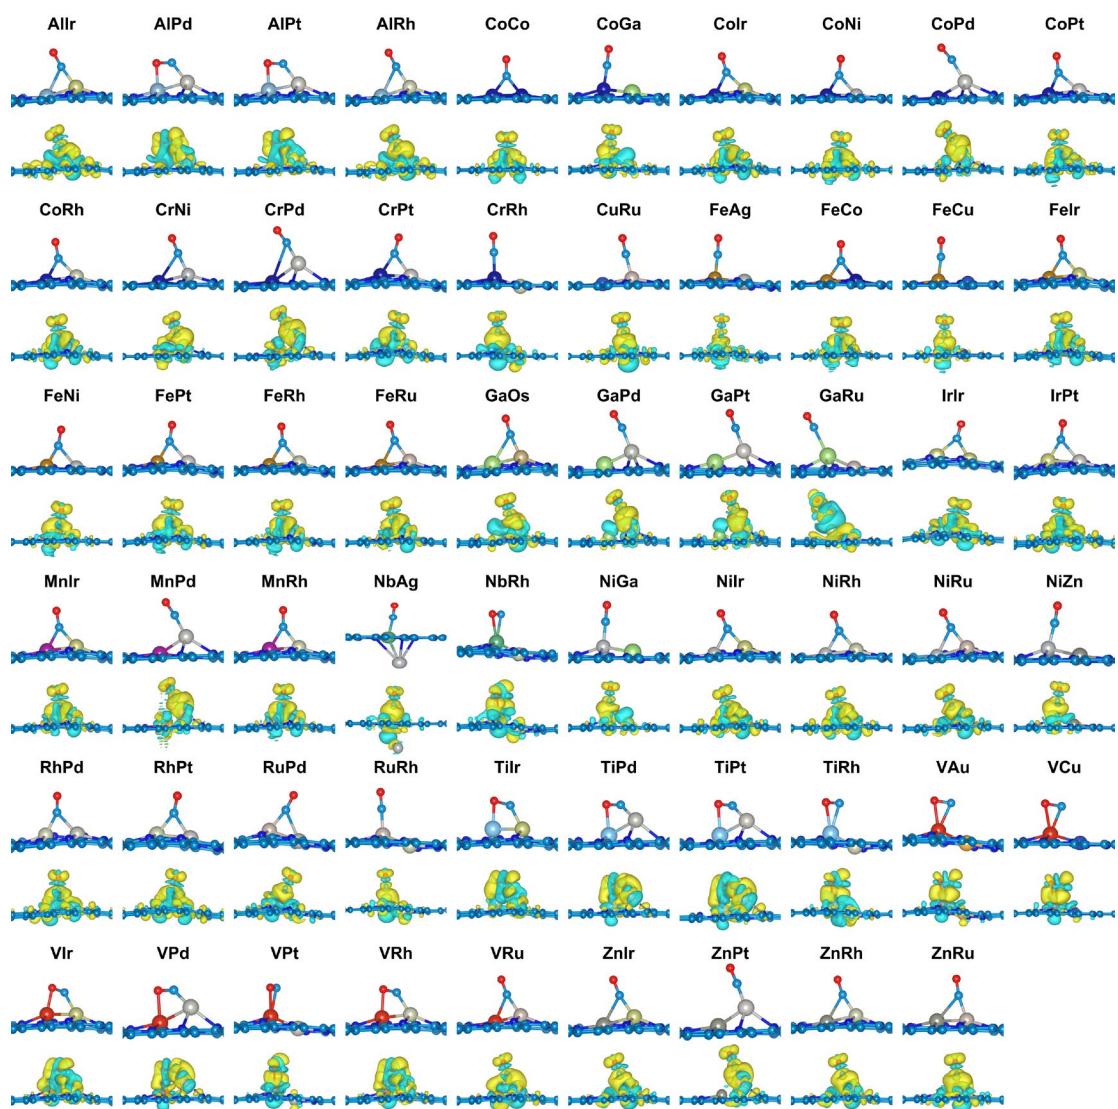

Figure S21. Optimal adsorption configurations and charge density differences of 59 M1M2-N6@Gra surface chemisorbed \*CO.

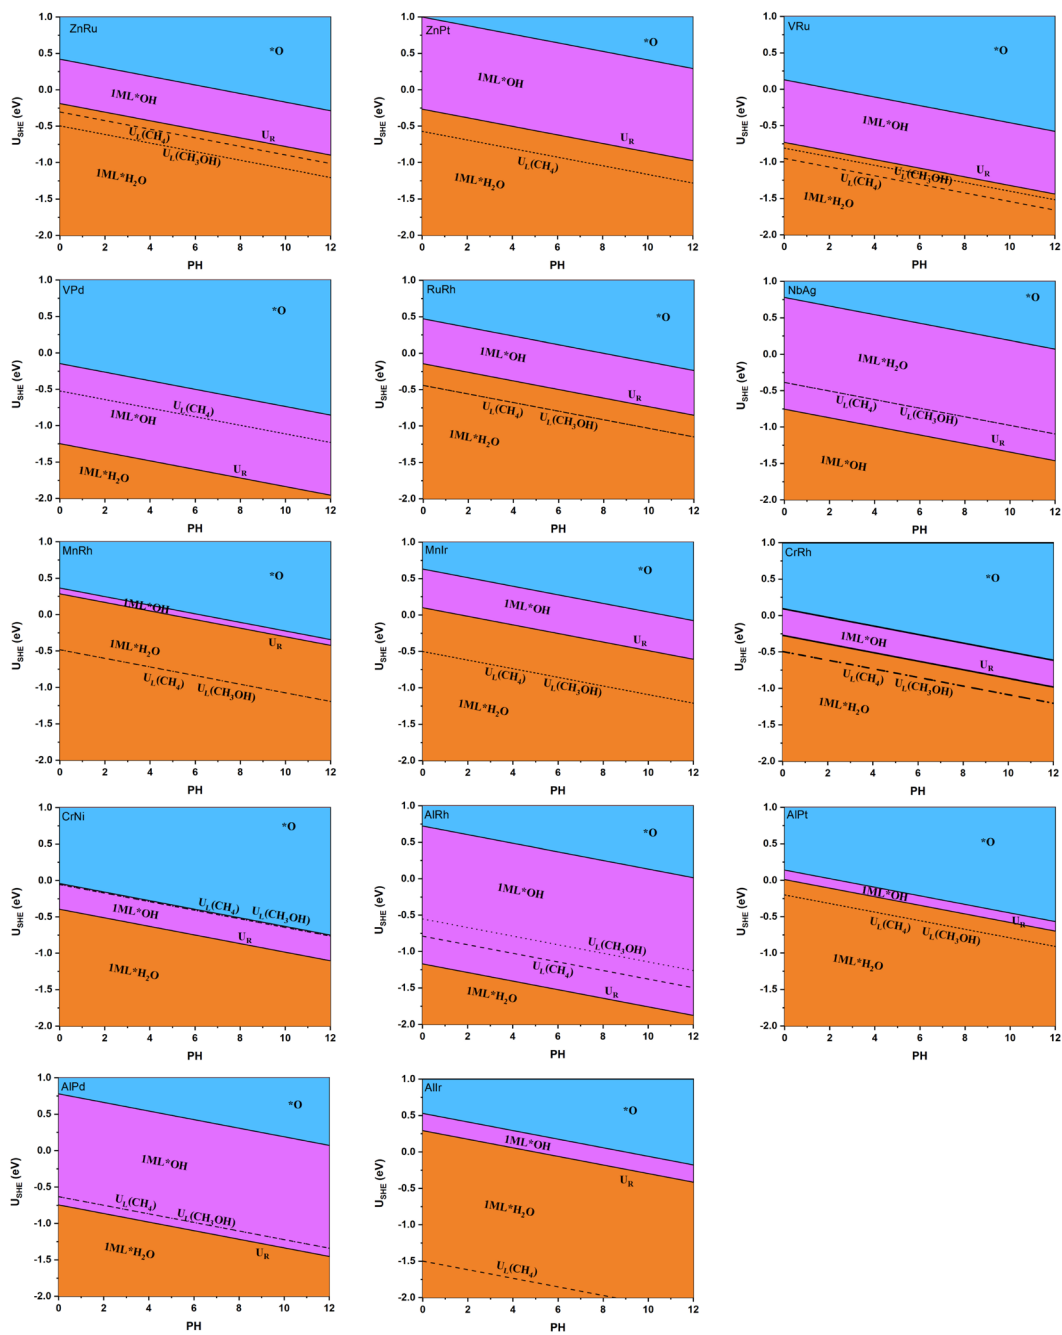

Figure S22. Surface Pourbaix diagrams on the 14 M1M2-N6@Gra (M1M2= ZnRu, ZnPt, VRu, VPd, RuRh, NbAg, MnRh, MnIr, CrRh, CrNi, AlRh, Allr, AlPd and AlPt). The thermodynamically stable states of the surface under relevant reversible hydrogen electrode (RHE) and pH values are highlighted by blue (for \*O), pink (for \*OH), and orange (for \*H<sub>2</sub>O), respectively.

**Table S1.** Calculated structural parameters (M1-M2 bond length (Å), M1 - N<sub>i</sub> (i = 1, 2, 3) bond length (Å) and M2 - N<sub>j</sub> (j = 4, 5, and 6) bond length (Å)).

| Metal | d <sub>M1-M2</sub> | d <sub>M1-N1</sub> | d <sub>M1-N2</sub> | d <sub>M1-N3</sub> | d <sub>M2-N4</sub> | d <sub>M2-N5</sub> | d <sub>M2-N6</sub> |
|-------|--------------------|--------------------|--------------------|--------------------|--------------------|--------------------|--------------------|
| AlSc  | 2.74               | 1.88               | 2.66               | 1.92               | 2.05               | 2.15               | 2.20               |
| AlTi  | 2.62               | 1.89               | 2.60               | 1.90               | 2.00               | 2.09               | 2.20               |
| AlV   | 2.55               | 1.91               | 2.45               | 1.90               | 1.95               | 2.05               | 2.12               |
| AlCr  | 2.56               | 1.92               | 2.23               | 1.94               | 1.97               | 2.02               | 2.01               |
| AlMn  | 2.45               | 1.89               | 1.97               | 1.92               | 1.99               | 1.95               | 2.02               |
| AlFe  | 2.36               | 1.89               | 1.98               | 1.90               | 1.93               | 1.91               | 2.00               |
| AlCo  | 2.38               | 1.92               | 1.97               | 1.90               | 1.90               | 1.90               | 1.96               |
| AlNi  | 2.31               | 1.96               | 1.94               | 1.93               | 1.94               | 1.85               | 1.97               |
| AlCu  | 2.43               | 1.88               | 1.92               | 1.91               | 1.93               | 1.87               | 1.95               |
| AlZn  | 2.47               | 1.94               | 2.06               | 1.95               | 2.06               | 2.23               | 2.04               |
| AlGa  | 2.64               | 1.88               | 1.96               | 1.90               | 2.07               | 2.34               | 2.03               |
| AlY   | 2.85               | 1.87               | 2.71               | 1.90               | 2.19               | 2.31               | 2.29               |
| AlZr  | 2.76               | 1.86               | 2.70               | 1.89               | 2.11               | 2.20               | 2.26               |
| AlNb  | 2.60               | 1.88               | 2.59               | 1.88               | 2.05               | 2.14               | 2.20               |
| AlMo  | 2.49               | 1.85               | 2.43               | 1.84               | 2.00               | 2.10               | 2.17               |
| AlRu  | 2.32               | 1.87               | 2.11               | 1.83               | 1.93               | 2.07               | 2.10               |
| AlRh  | 2.41               | 1.89               | 2.13               | 1.88               | 1.94               | 2.04               | 2.05               |
| AlPd  | 2.31               | 1.92               | 1.99               | 1.95               | 2.05               | 1.95               | 2.12               |
| AlAg  | 2.52               | 1.95               | 2.02               | 1.94               | 2.44               | 2.53               | 2.49               |
| AlSn  | 2.86               | 1.97               | 2.04               | 1.95               | 2.30               | 2.77               | 2.38               |
| AlHf  | 2.77               | 1.86               | 2.74               | 1.90               | 2.07               | 2.16               | 2.23               |
| AlTa  | 2.61               | 1.87               | 2.65               | 1.87               | 2.05               | 2.10               | 2.21               |
| AlW   | 2.50               | 1.85               | 2.47               | 1.84               | 2.00               | 2.08               | 2.15               |
| AlRe  | 2.40               | 1.87               | 2.28               | 1.84               | 1.96               | 2.07               | 2.09               |
| AlOs  | 2.34               | 1.87               | 2.15               | 1.82               | 1.93               | 2.06               | 2.07               |
| AlIr  | 2.42               | 1.88               | 2.17               | 1.87               | 1.94               | 2.04               | 2.02               |
| AlPt  | 2.32               | 1.92               | 1.99               | 1.96               | 2.03               | 1.95               | 2.12               |
| AlAu  | 2.37               | 1.85               | 1.95               | 1.93               | 2.03               | 1.94               | 2.11               |
| AlBi  | 2.89               | 1.98               | 2.00               | 1.93               | 2.30               | 2.96               | 2.50               |
| ScTi  | 2.71               | 2.10               | 2.20               | 2.08               | 1.99               | 2.11               | 2.13               |
| ScV   | 2.63               | 2.07               | 2.23               | 2.07               | 1.93               | 2.06               | 2.08               |
| ScCr  | 2.74               | 2.08               | 2.15               | 2.09               | 1.95               | 2.01               | 1.98               |
| ScMn  | 2.60               | 2.21               | 2.14               | 2.09               | 1.96               | 1.99               | 1.99               |
| ScFe  | 2.45               | 2.22               | 2.16               | 2.09               | 1.90               | 1.97               | 1.98               |
| ScCo  | 2.35               | 2.28               | 2.14               | 2.10               | 1.86               | 1.97               | 1.93               |
| ScNi  | 2.32               | 2.25               | 2.11               | 2.10               | 1.90               | 1.91               | 1.97               |
| ScCu  | 2.55               | 2.10               | 2.11               | 2.08               | 1.90               | 1.92               | 1.94               |
| ScZn  | 2.71               | 2.31               | 2.10               | 2.07               | 2.26               | 2.90               | 2.19               |
| ScGa  | 2.74               | 2.19               | 2.13               | 2.05               | 2.03               | 2.73               | 1.99               |
| ScY   | 3.01               | 2.05               | 2.14               | 2.07               | 2.31               | 2.35               | 2.15               |
| ScZr  | 2.83               | 2.05               | 2.15               | 2.14               | 2.20               | 2.17               | 2.11               |
| ScNb  | 2.72               | 2.08               | 2.15               | 2.14               | 2.13               | 2.15               | 2.07               |

|      |      |      |      |      |      |      |      |
|------|------|------|------|------|------|------|------|
| ScMo | 2.53 | 2.23 | 2.20 | 2.10 | 1.98 | 2.12 | 2.15 |
| ScRu | 2.39 | 2.28 | 2.23 | 2.09 | 1.92 | 2.09 | 2.04 |
| ScRh | 2.44 | 2.23 | 2.18 | 2.07 | 1.92 | 2.08 | 2.03 |
| ScPd | 2.39 | 2.16 | 2.15 | 2.14 | 2.03 | 1.97 | 2.13 |
| ScAg | 2.62 | 2.01 | 2.12 | 2.16 | 2.06 | 2.00 | 2.14 |
| ScSn | 3.06 | 2.33 | 2.10 | 2.06 | 2.26 | 3.29 | 2.27 |
| ScHf | 2.84 | 2.05 | 2.16 | 2.14 | 2.14 | 2.12 | 2.06 |
| ScTa | 2.70 | 2.11 | 2.23 | 2.12 | 2.02 | 2.09 | 2.18 |
| ScW  | 2.57 | 2.19 | 2.23 | 2.11 | 1.97 | 2.09 | 2.13 |
| ScRe | 2.50 | 2.20 | 2.29 | 2.11 | 1.94 | 2.06 | 2.07 |
| ScOs | 2.45 | 2.25 | 2.27 | 2.09 | 1.93 | 2.08 | 2.02 |
| ScIr | 2.51 | 2.18 | 2.21 | 2.07 | 1.92 | 2.07 | 2.01 |
| ScPt | 2.42 | 2.17 | 2.15 | 2.17 | 2.02 | 1.97 | 2.15 |
| ScAu | 2.58 | 2.04 | 2.11 | 2.17 | 2.03 | 1.97 | 2.15 |
| ScBi | 3.06 | 2.36 | 2.10 | 2.07 | 2.29 | 3.34 | 2.38 |
| TiV  | 2.50 | 2.06 | 2.14 | 1.98 | 1.92 | 2.07 | 2.02 |
| TiCr | 2.73 | 1.97 | 2.07 | 2.06 | 1.94 | 2.00 | 1.96 |
| TiMn | 2.39 | 2.18 | 2.09 | 2.01 | 1.97 | 2.00 | 2.05 |
| TiFe | 2.10 | 2.28 | 2.05 | 2.08 | 1.94 | 1.93 | 2.07 |
| TiCo | 2.02 | 2.28 | 2.01 | 2.07 | 1.91 | 1.92 | 2.04 |
| TiNi | 2.24 | 2.19 | 2.04 | 2.02 | 1.88 | 1.93 | 1.96 |
| TiCu | 2.45 | 2.08 | 2.08 | 1.98 | 1.88 | 1.94 | 1.93 |
| TiZn | 2.60 | 2.24 | 2.07 | 2.01 | 2.11 | 2.71 | 2.11 |
| TiGa | 2.64 | 2.21 | 2.09 | 2.00 | 2.03 | 2.69 | 2.03 |
| TiY  | 2.85 | 1.98 | 2.08 | 2.09 | 2.26 | 2.28 | 2.21 |
| TiZr | 2.64 | 2.02 | 2.08 | 2.11 | 2.19 | 2.17 | 2.15 |
| TiNb | 2.23 | 2.11 | 2.03 | 2.16 | 2.17 | 2.06 | 2.14 |
| TiMo | 2.30 | 2.20 | 2.14 | 2.01 | 2.01 | 2.12 | 2.19 |
| TiRu | 2.11 | 2.26 | 2.06 | 2.06 | 1.98 | 2.04 | 2.10 |
| TiRh | 2.10 | 2.20 | 2.04 | 2.06 | 2.01 | 1.99 | 2.15 |
| TiPd | 2.31 | 2.09 | 2.07 | 2.04 | 2.01 | 1.98 | 2.11 |
| TiAg | 2.57 | 1.95 | 2.05 | 2.11 | 2.06 | 2.00 | 2.14 |
| TiSn | 2.94 | 2.30 | 2.05 | 2.00 | 2.24 | 3.02 | 2.32 |
| TiHf | 2.67 | 2.02 | 2.06 | 2.11 | 2.15 | 2.12 | 2.12 |
| TiTa | 2.42 | 2.10 | 2.04 | 2.14 | 2.14 | 2.06 | 2.13 |
| TiW  | 2.36 | 2.15 | 2.15 | 2.04 | 1.99 | 2.07 | 2.18 |
| TiRe | 2.27 | 2.20 | 2.17 | 2.03 | 1.97 | 2.07 | 2.14 |
| TiOs | 2.22 | 2.24 | 2.08 | 2.05 | 1.95 | 2.04 | 2.06 |
| TiIr | 2.18 | 2.18 | 2.05 | 2.09 | 2.00 | 1.97 | 2.14 |
| TiPt | 2.33 | 2.09 | 2.05 | 2.07 | 2.00 | 1.97 | 2.11 |
| TiAu | 2.54 | 1.97 | 2.02 | 2.13 | 2.03 | 1.96 | 2.14 |
| TiBi | 2.86 | 2.33 | 2.06 | 2.03 | 2.31 | 3.15 | 2.44 |
| VCr  | 2.63 | 1.99 | 2.07 | 1.94 | 1.94 | 2.04 | 1.95 |
| VMn  | 2.61 | 1.97 | 2.06 | 1.97 | 1.94 | 1.99 | 1.92 |
| VFe  | 2.24 | 2.10 | 2.05 | 1.92 | 1.83 | 2.04 | 1.93 |
| VCo  | 2.08 | 2.16 | 2.00 | 1.96 | 1.89 | 1.94 | 2.02 |
| VNi  | 2.23 | 2.11 | 2.03 | 1.93 | 1.86 | 1.97 | 1.94 |
| VCu  | 2.47 | 2.00 | 2.03 | 1.95 | 1.91 | 1.92 | 1.95 |

|      |      |      |      |      |      |      |      |
|------|------|------|------|------|------|------|------|
| VZn  | 2.58 | 2.13 | 2.05 | 1.94 | 2.05 | 2.51 | 2.07 |
| VGa  | 2.65 | 2.10 | 2.06 | 1.94 | 2.05 | 2.60 | 2.07 |
| VY   | 2.76 | 2.06 | 2.07 | 1.93 | 2.21 | 2.35 | 2.21 |
| VZr  | 2.50 | 2.11 | 2.09 | 1.93 | 2.12 | 2.24 | 2.29 |
| VNb  | 2.37 | 2.13 | 2.09 | 1.94 | 2.02 | 2.18 | 2.21 |
| VMo  | 2.38 | 2.00 | 2.12 | 1.95 | 2.00 | 2.12 | 2.10 |
| VRu  | 1.94 | 2.20 | 1.98 | 2.02 | 2.03 | 2.00 | 2.21 |
| VRh  | 2.09 | 2.11 | 2.02 | 1.97 | 2.00 | 2.00 | 2.15 |
| VPd  | 2.29 | 2.03 | 2.06 | 1.95 | 1.99 | 2.00 | 2.09 |
| VAg  | 2.78 | 2.09 | 2.05 | 1.94 | 2.30 | 2.64 | 2.36 |
| VSn  | 2.82 | 2.13 | 2.05 | 1.95 | 2.19 | 2.73 | 2.23 |
| VHf  | 2.67 | 2.04 | 2.07 | 1.93 | 2.09 | 2.18 | 2.09 |
| VTa  | 2.35 | 2.12 | 2.10 | 1.95 | 2.03 | 2.14 | 2.21 |
| VW   | 1.77 | 2.18 | 1.93 | 2.11 | 2.11 | 1.98 | 2.15 |
| VRe  | 1.92 | 2.19 | 1.95 | 2.05 | 2.04 | 1.98 | 2.14 |
| VOs  | 2.02 | 2.19 | 1.98 | 2.03 | 2.01 | 1.98 | 2.18 |
| VIr  | 2.14 | 2.11 | 2.00 | 1.99 | 1.98 | 1.99 | 2.12 |
| VPt  | 2.28 | 2.04 | 2.06 | 1.95 | 1.97 | 2.00 | 2.10 |
| VAu  | 2.48 | 1.97 | 2.06 | 2.01 | 2.02 | 1.97 | 2.15 |
| VBi  | 2.80 | 2.22 | 2.06 | 1.98 | 2.26 | 2.99 | 2.37 |
| CrMn | 2.55 | 1.94 | 2.00 | 1.94 | 1.93 | 1.99 | 1.91 |
| CrFe | 2.21 | 2.05 | 2.00 | 1.94 | 1.90 | 1.97 | 2.02 |
| CrCo | 2.25 | 2.05 | 2.01 | 1.92 | 1.86 | 1.97 | 1.96 |
| CrNi | 2.37 | 2.03 | 2.00 | 1.95 | 1.89 | 1.93 | 1.94 |
| CrCu | 2.43 | 1.98 | 1.99 | 1.94 | 1.91 | 1.92 | 1.94 |
| CrZn | 2.55 | 1.94 | 2.04 | 1.90 | 1.89 | 1.99 | 1.88 |
| CrGa | 2.91 | 2.04 | 2.03 | 1.92 | 2.12 | 2.67 | 2.13 |
| CrY  | 2.92 | 1.98 | 2.04 | 1.93 | 2.23 | 2.30 | 2.19 |
| CrZr | 2.54 | 2.01 | 2.08 | 1.91 | 2.12 | 2.23 | 2.29 |
| CrNb | 2.39 | 2.03 | 2.06 | 1.94 | 2.04 | 2.14 | 2.26 |
| CrMo | 2.34 | 2.04 | 2.04 | 1.95 | 1.99 | 2.10 | 2.16 |
| CrRu | 2.26 | 1.99 | 2.06 | 1.90 | 1.91 | 2.09 | 2.04 |
| CrRh | 2.45 | 1.99 | 2.06 | 1.94 | 1.92 | 2.06 | 2.01 |
| CrPd | 2.38 | 1.99 | 2.01 | 1.96 | 2.01 | 2.01 | 2.09 |
| CrAg | 2.75 | 2.02 | 2.03 | 1.93 | 2.26 | 2.43 | 2.31 |
| CrSn | 2.87 | 2.10 | 2.04 | 1.94 | 2.21 | 2.79 | 2.30 |
| CrHf | 2.57 | 1.97 | 2.07 | 1.95 | 2.09 | 2.14 | 2.25 |
| CrTa | 2.40 | 2.02 | 2.07 | 1.96 | 2.03 | 2.10 | 2.22 |
| CrW  | 2.39 | 2.02 | 2.06 | 1.96 | 1.98 | 2.07 | 2.14 |
| CrRe | 2.27 | 1.99 | 2.07 | 1.89 | 1.93 | 2.10 | 2.04 |
| CrOs | 2.30 | 1.99 | 2.08 | 1.89 | 1.91 | 2.09 | 2.00 |
| CrIr | 2.47 | 2.00 | 2.06 | 1.95 | 1.93 | 2.05 | 1.99 |
| CrPt | 2.37 | 2.00 | 2.01 | 1.98 | 1.99 | 1.98 | 2.09 |
| CrAu | 2.43 | 1.95 | 2.01 | 1.99 | 2.03 | 1.99 | 2.13 |
| CrBi | 2.84 | 2.11 | 2.03 | 1.94 | 2.29 | 2.96 | 2.52 |
| MnFe | 2.36 | 1.98 | 1.95 | 1.93 | 1.88 | 1.96 | 1.97 |
| MnCo | 2.24 | 2.07 | 1.93 | 1.97 | 1.91 | 1.90 | 1.97 |
| MnNi | 2.30 | 2.04 | 1.92 | 1.95 | 1.90 | 1.90 | 1.95 |



|      |      |      |      |      |      |      |      |
|------|------|------|------|------|------|------|------|
| MnCu | 2.43 | 1.93 | 1.97 | 1.91 | 1.91 | 1.91 | 1.95 |
| MnZn | 2.55 | 1.95 | 1.99 | 1.97 | 1.93 | 1.99 | 1.93 |
| MnGa | 2.66 | 2.09 | 1.98 | 1.99 | 2.11 | 2.54 | 2.10 |
| MnY  | 2.73 | 1.98 | 1.99 | 1.97 | 2.22 | 2.26 | 2.33 |
| MnZr | 2.53 | 2.02 | 2.01 | 1.97 | 2.12 | 2.17 | 2.28 |
| MnNb | 2.42 | 2.03 | 2.02 | 1.96 | 2.04 | 2.11 | 2.23 |
| MnMo | 1.78 | 2.19 | 1.94 | 2.00 | 2.14 | 2.02 | 2.37 |
| MnRu | 2.10 | 2.02 | 2.01 | 1.90 | 1.95 | 2.04 | 2.12 |
| MnRh | 2.37 | 1.97 | 1.96 | 1.94 | 1.94 | 2.02 | 2.01 |
| MnPd | 2.32 | 1.99 | 1.95 | 1.95 | 1.99 | 1.97 | 2.07 |
| MnAg | 2.42 | 1.89 | 1.99 | 1.92 | 2.02 | 1.98 | 2.09 |
| MnSn | 2.74 | 2.05 | 1.94 | 1.98 | 2.28 | 2.44 | 2.31 |
| MnHf | 2.51 | 2.00 | 2.02 | 1.96 | 2.09 | 2.14 | 2.26 |
| MnTa | 2.42 | 2.02 | 2.04 | 1.96 | 2.03 | 2.08 | 2.21 |
| MnW  | 1.92 | 2.15 | 1.92 | 1.99 | 2.10 | 2.00 | 2.31 |
| MnRe | 2.26 | 1.97 | 2.06 | 1.87 | 1.92 | 2.08 | 2.06 |
| MnOs | 2.13 | 2.04 | 2.00 | 1.90 | 1.94 | 2.02 | 2.08 |
| MnIr | 2.30 | 2.03 | 1.97 | 1.96 | 1.96 | 1.99 | 2.04 |
| MnPt | 2.32 | 1.99 | 1.94 | 1.96 | 1.98 | 1.97 | 2.07 |
| MnAu | 2.40 | 1.90 | 1.97 | 1.93 | 2.00 | 1.97 | 2.10 |
| MnBi | 2.68 | 1.98 | 1.95 | 1.96 | 2.33 | 2.42 | 2.41 |
| FeCo | 2.18 | 2.06 | 1.91 | 1.93 | 1.90 | 1.90 | 2.00 |
| FeNi | 2.32 | 1.99 | 1.93 | 1.91 | 1.90 | 1.90 | 1.96 |
| FeCu | 2.43 | 1.91 | 1.95 | 1.88 | 1.92 | 1.89 | 1.96 |
| FeZn | 2.49 | 1.91 | 2.01 | 1.85 | 1.93 | 2.03 | 1.96 |
| FeGa | 2.53 | 1.97 | 1.97 | 1.90 | 2.08 | 2.32 | 2.09 |
| FeY  | 2.59 | 1.98 | 1.98 | 1.90 | 2.22 | 2.28 | 2.34 |
| FeZr | 2.36 | 1.99 | 1.97 | 1.90 | 2.14 | 2.17 | 2.31 |
| FeNb | 2.11 | 2.03 | 1.94 | 1.92 | 2.11 | 2.07 | 2.32 |
| FeMo | 2.03 | 2.04 | 1.95 | 1.92 | 2.05 | 2.03 | 2.23 |
| FeRu | 2.18 | 1.97 | 2.01 | 1.86 | 1.94 | 2.03 | 2.10 |
| FeRh | 2.25 | 2.01 | 1.95 | 1.92 | 1.96 | 1.99 | 2.05 |
| FePd | 2.34 | 1.95 | 1.96 | 1.91 | 1.98 | 1.97 | 2.06 |
| FeAg | 2.42 | 1.87 | 1.98 | 1.89 | 2.03 | 1.98 | 2.11 |
| FeSn | 2.66 | 2.02 | 1.95 | 1.93 | 2.25 | 2.42 | 2.30 |
| FeHf | 2.34 | 1.99 | 1.97 | 1.90 | 2.11 | 2.13 | 2.28 |
| FeTa | 2.01 | 2.07 | 1.91 | 1.95 | 2.13 | 2.04 | 2.35 |
| FeW  | 2.03 | 2.06 | 1.93 | 1.93 | 2.04 | 2.00 | 2.22 |
| FeRe | 2.10 | 2.03 | 1.99 | 1.88 | 1.96 | 2.02 | 2.11 |
| FeOs | 2.17 | 1.98 | 2.01 | 1.85 | 1.94 | 2.03 | 2.07 |
| FeIr | 2.26 | 2.01 | 1.94 | 1.93 | 1.95 | 1.98 | 2.04 |
| FePt | 2.33 | 1.96 | 1.95 | 1.92 | 1.97 | 1.97 | 2.05 |
| FeAu | 2.39 | 1.88 | 1.95 | 1.91 | 2.01 | 1.96 | 2.11 |
| FeBi | 2.56 | 1.98 | 1.94 | 1.92 | 2.34 | 2.40 | 2.47 |
| CoNi | 2.34 | 1.95 | 1.88 | 1.90 | 1.91 | 1.86 | 1.98 |
| CoCu | 2.43 | 1.87 | 1.93 | 1.85 | 1.92 | 1.89 | 1.98 |
| CoZn | 2.49 | 1.88 | 2.00 | 1.83 | 1.91 | 1.97 | 1.95 |
| CoGa | 2.77 | 1.88 | 1.98 | 1.83 | 2.13 | 2.44 | 2.17 |

|      |      |      |      |      |      |      |      |
|------|------|------|------|------|------|------|------|
| CoY  | 2.51 | 1.92 | 1.97 | 1.86 | 2.23 | 2.27 | 2.39 |
| CoZr | 2.24 | 1.97 | 1.93 | 1.89 | 2.16 | 2.14 | 2.36 |
| CoNb | 2.18 | 1.96 | 1.94 | 1.88 | 2.07 | 2.06 | 2.27 |
| CoMo | 2.14 | 1.97 | 1.98 | 1.86 | 2.00 | 2.05 | 2.19 |
| CoRu | 2.26 | 1.92 | 2.02 | 1.83 | 1.93 | 2.05 | 2.08 |
| CoRh | 2.32 | 1.95 | 1.96 | 1.87 | 1.94 | 2.00 | 2.04 |
| CoPd | 2.37 | 1.92 | 1.92 | 1.90 | 1.99 | 1.96 | 2.07 |
| CoAg | 2.40 | 1.84 | 1.96 | 1.87 | 2.03 | 1.97 | 2.12 |
| CoSn | 2.63 | 1.95 | 1.93 | 1.89 | 2.28 | 2.36 | 2.37 |
| CoHf | 2.16 | 1.98 | 1.92 | 1.90 | 2.14 | 2.09 | 2.36 |
| CoTa | 2.15 | 1.98 | 1.93 | 1.90 | 2.07 | 2.04 | 2.26 |
| CoW  | 2.15 | 1.98 | 1.97 | 1.86 | 1.99 | 2.03 | 2.16 |
| CoRe | 2.19 | 1.95 | 2.01 | 1.84 | 1.94 | 2.04 | 2.08 |
| CoOs | 2.26 | 1.92 | 2.04 | 1.82 | 1.92 | 2.04 | 2.04 |
| CoIr | 2.31 | 1.97 | 1.95 | 1.89 | 1.94 | 2.00 | 2.02 |
| CoPt | 2.37 | 1.93 | 1.91 | 1.92 | 1.98 | 1.96 | 2.06 |
| CoAu | 2.39 | 1.85 | 1.93 | 1.89 | 2.01 | 1.95 | 2.13 |
| CoBi | 2.54 | 1.94 | 1.92 | 1.90 | 2.34 | 2.33 | 2.47 |
| NiCu | 2.41 | 1.91 | 1.92 | 1.88 | 1.92 | 1.90 | 1.98 |
| NiZn | 2.46 | 1.91 | 1.96 | 1.88 | 1.93 | 1.97 | 1.97 |
| NiGa | 2.30 | 1.94 | 1.89 | 1.93 | 2.01 | 2.03 | 2.05 |
| NiY  | 2.48 | 1.95 | 1.91 | 1.90 | 2.24 | 2.24 | 2.36 |
| NiZr | 2.37 | 1.93 | 1.93 | 1.88 | 2.14 | 2.13 | 2.27 |
| NiNb | 2.31 | 1.92 | 1.96 | 1.86 | 2.03 | 2.09 | 2.20 |
| NiMo | 2.32 | 1.91 | 1.98 | 1.85 | 1.99 | 2.07 | 2.14 |
| NiRu | 2.34 | 1.94 | 1.97 | 1.88 | 1.94 | 2.03 | 2.03 |
| NiRh | 2.41 | 1.91 | 1.97 | 1.86 | 1.92 | 2.02 | 2.01 |
| NiPd | 2.37 | 1.92 | 1.89 | 1.91 | 1.99 | 1.95 | 2.05 |
| NiAg | 2.39 | 1.87 | 1.95 | 1.89 | 2.02 | 1.96 | 2.10 |
| NiSn | 2.67 | 1.94 | 1.93 | 1.89 | 2.27 | 2.32 | 2.32 |
| NiHf | 2.33 | 1.94 | 1.92 | 1.88 | 2.10 | 2.10 | 2.25 |
| NiTa | 2.28 | 1.93 | 1.96 | 1.86 | 2.03 | 2.06 | 2.19 |
| NiW  | 2.26 | 1.90 | 2.01 | 1.84 | 1.96 | 2.05 | 2.12 |
| NiRe | 2.33 | 1.95 | 1.94 | 1.90 | 1.98 | 2.02 | 2.06 |
| NiOs | 2.34 | 1.95 | 1.96 | 1.88 | 1.92 | 2.02 | 2.01 |
| NiIr | 2.40 | 1.95 | 1.92 | 1.92 | 1.94 | 1.98 | 2.00 |
| NiPt | 2.38 | 1.92 | 1.88 | 1.92 | 1.97 | 1.95 | 2.05 |
| NiAu | 2.38 | 1.87 | 1.92 | 1.90 | 2.00 | 1.95 | 2.10 |
| NiBi | 2.50 | 1.93 | 1.90 | 1.93 | 2.32 | 2.29 | 2.43 |
| CuZn | 2.41 | 1.96 | 1.91 | 1.93 | 1.95 | 1.97 | 1.98 |
| CuGa | 2.48 | 2.00 | 1.92 | 1.95 | 2.12 | 2.23 | 2.13 |
| CuY  | 2.66 | 1.93 | 1.92 | 1.90 | 2.21 | 2.23 | 2.24 |
| CuZr | 2.56 | 1.92 | 1.94 | 1.89 | 2.11 | 2.15 | 2.17 |
| CuNb | 2.57 | 1.95 | 1.93 | 1.91 | 2.05 | 2.13 | 2.08 |
| CuMo | 2.48 | 1.93 | 1.96 | 1.90 | 2.02 | 2.08 | 2.07 |
| CuRu | 2.43 | 1.93 | 1.94 | 1.92 | 1.94 | 2.01 | 1.99 |
| CuRh | 2.43 | 1.95 | 1.92 | 1.92 | 1.93 | 1.99 | 1.98 |
| CuPd | 2.42 | 1.93 | 1.91 | 1.92 | 1.96 | 1.99 | 2.01 |

|      |      |      |      |      |      |      |      |
|------|------|------|------|------|------|------|------|
| CuAg | 2.57 | 1.98 | 1.95 | 1.93 | 2.25 | 2.24 | 2.33 |
| CuSn | 2.64 | 1.98 | 1.91 | 1.94 | 2.25 | 2.32 | 2.27 |
| CuHf | 2.53 | 1.92 | 1.95 | 1.89 | 2.08 | 2.12 | 2.14 |
| CuTa | 2.45 | 1.89 | 1.97 | 1.88 | 2.00 | 2.09 | 2.13 |
| CuW  | 2.47 | 1.92 | 1.96 | 1.91 | 1.99 | 2.05 | 2.05 |
| CuRe | 2.42 | 1.91 | 1.98 | 1.89 | 1.95 | 2.04 | 2.01 |
| CuOs | 2.44 | 1.93 | 1.94 | 1.93 | 1.92 | 2.01 | 1.96 |
| CuIr | 2.43 | 1.94 | 1.92 | 1.93 | 1.93 | 1.98 | 1.97 |
| CuPt | 2.42 | 1.93 | 1.91 | 1.93 | 1.96 | 1.99 | 2.00 |
| CuAu | 2.40 | 1.90 | 1.98 | 1.94 | 2.02 | 1.98 | 2.12 |
| CuBi | 2.65 | 1.95 | 1.92 | 1.94 | 2.28 | 2.30 | 2.29 |
| ZnGa | 2.78 | 2.01 | 1.96 | 1.94 | 2.13 | 2.50 | 2.11 |
| ZnY  | 2.88 | 2.21 | 3.13 | 2.45 | 2.22 | 2.22 | 2.42 |
| ZnZr | 2.74 | 2.14 | 2.94 | 2.27 | 2.12 | 2.13 | 2.34 |
| ZnNb | 2.62 | 2.08 | 2.75 | 2.10 | 2.03 | 2.09 | 2.26 |
| ZnMo | 2.55 | 2.02 | 2.58 | 2.01 | 2.01 | 2.09 | 2.18 |
| ZnRu | 2.47 | 1.97 | 2.20 | 1.94 | 1.93 | 2.07 | 2.03 |
| ZnRh | 2.45 | 1.92 | 2.03 | 1.90 | 1.91 | 2.07 | 1.99 |
| ZnPd | 2.41 | 1.93 | 2.02 | 1.93 | 1.98 | 2.01 | 2.05 |
| ZnAg | 2.57 | 1.96 | 1.98 | 1.94 | 2.20 | 2.18 | 2.27 |
| ZnSn | 2.97 | 1.94 | 1.95 | 1.91 | 2.21 | 2.41 | 2.16 |
| ZnHf | 2.71 | 2.13 | 2.90 | 2.23 | 2.08 | 2.09 | 2.32 |
| ZnTa | 2.62 | 2.06 | 2.73 | 2.10 | 2.02 | 2.07 | 2.23 |
| ZnW  | 2.55 | 2.03 | 2.60 | 2.02 | 2.00 | 2.07 | 2.16 |
| ZnRe | 2.50 | 1.98 | 2.45 | 1.96 | 1.97 | 2.08 | 2.10 |
| ZnOs | 2.48 | 1.99 | 2.27 | 1.96 | 1.92 | 2.04 | 2.01 |
| ZnIr | 2.46 | 1.91 | 2.05 | 1.89 | 1.92 | 2.06 | 1.98 |
| ZnPt | 2.42 | 1.96 | 2.09 | 1.97 | 1.98 | 2.00 | 2.05 |
| ZnAu | 2.41 | 1.95 | 2.09 | 1.99 | 2.07 | 2.01 | 2.17 |
| ZnBi | 2.69 | 2.02 | 2.10 | 2.03 | 2.34 | 2.49 | 2.47 |
| GaY  | 2.85 | 1.98 | 2.80 | 2.03 | 2.18 | 2.27 | 2.29 |
| GaZr | 2.75 | 1.98 | 2.78 | 2.02 | 2.11 | 2.18 | 2.26 |
| GaNb | 2.63 | 2.00 | 2.69 | 2.01 | 2.05 | 2.14 | 2.21 |
| GaMo | 2.71 | 2.12 | 2.75 | 2.08 | 2.01 | 2.08 | 2.18 |
| GaRu | 2.51 | 2.10 | 2.48 | 2.02 | 1.93 | 2.06 | 2.05 |
| GaRh | 2.73 | 2.23 | 2.57 | 2.15 | 1.92 | 2.04 | 2.01 |
| GaPd | 2.34 | 2.00 | 2.12 | 2.03 | 2.05 | 1.99 | 2.07 |
| GaAg | 2.47 | 2.09 | 2.34 | 2.11 | 2.34 | 2.42 | 2.37 |
| GaSn | 2.85 | 2.04 | 2.33 | 2.08 | 2.29 | 2.48 | 2.28 |
| GaHf | 2.78 | 1.99 | 2.79 | 2.04 | 2.07 | 2.13 | 2.21 |
| GaTa | 2.63 | 1.99 | 2.72 | 2.00 | 2.04 | 2.10 | 2.21 |
| GaW  | 2.55 | 1.98 | 2.61 | 1.97 | 2.00 | 2.09 | 2.15 |
| GaRe | 2.46 | 2.03 | 2.50 | 1.97 | 1.95 | 2.07 | 2.09 |
| GaOs | 2.54 | 2.09 | 2.51 | 2.02 | 1.93 | 2.06 | 2.02 |
| GaIr | 2.75 | 2.26 | 2.61 | 2.15 | 1.92 | 2.04 | 1.99 |
| GaPt | 2.34 | 2.00 | 2.13 | 2.04 | 2.03 | 1.99 | 2.07 |
| GaAu | 2.42 | 2.01 | 2.18 | 2.09 | 2.07 | 1.99 | 2.15 |
| GaBi | 2.79 | 2.06 | 2.10 | 2.02 | 2.31 | 2.97 | 2.51 |

|      |      |      |      |      |      |      |      |
|------|------|------|------|------|------|------|------|
| YZr  | 2.96 | 2.20 | 2.29 | 2.29 | 2.22 | 2.17 | 2.10 |
| YNb  | 2.85 | 2.22 | 2.29 | 2.28 | 2.14 | 2.13 | 2.06 |
| YMo  | 2.67 | 2.36 | 2.33 | 2.23 | 1.97 | 2.12 | 2.14 |
| YRu  | 2.54 | 2.39 | 2.36 | 2.24 | 1.92 | 2.09 | 2.02 |
| YRh  | 2.62 | 2.31 | 2.31 | 2.21 | 1.91 | 2.09 | 2.01 |
| YPd  | 2.53 | 2.29 | 2.29 | 2.29 | 2.04 | 1.99 | 2.14 |
| YAg  | 2.73 | 2.15 | 2.25 | 2.28 | 2.07 | 2.02 | 2.14 |
| YSn  | 3.20 | 2.40 | 2.23 | 2.21 | 2.27 | 3.51 | 2.25 |
| YTa  | 2.77 | 2.30 | 2.35 | 2.25 | 2.00 | 2.12 | 2.18 |
| YW   | 2.70 | 2.32 | 2.35 | 2.25 | 1.96 | 2.09 | 2.12 |
| YRe  | 2.65 | 2.34 | 2.41 | 2.24 | 1.94 | 2.08 | 2.05 |
| YOs  | 2.60 | 2.37 | 2.39 | 2.24 | 1.93 | 2.07 | 2.01 |
| YIr  | 2.66 | 2.29 | 2.33 | 2.22 | 1.92 | 2.07 | 2.00 |
| YPt  | 2.57 | 2.30 | 2.29 | 2.31 | 2.03 | 1.98 | 2.15 |
| YAu  | 2.70 | 2.18 | 2.25 | 2.30 | 2.04 | 1.99 | 2.16 |
| YBi  | 3.20 | 2.43 | 2.23 | 2.22 | 2.32 | 3.56 | 2.37 |
| ZrMo | 2.48 | 2.28 | 2.25 | 2.12 | 2.00 | 2.13 | 2.16 |
| ZrRu | 2.37 | 2.34 | 2.22 | 2.13 | 1.92 | 2.10 | 2.04 |
| ZrRh | 2.32 | 2.29 | 2.18 | 2.18 | 2.01 | 2.00 | 2.11 |
| ZrPd | 2.47 | 2.16 | 2.15 | 2.18 | 2.01 | 1.98 | 2.10 |
| ZrAg | 2.68 | 2.05 | 2.14 | 2.20 | 2.05 | 1.99 | 2.12 |
| ZrSn | 3.06 | 2.37 | 2.10 | 2.09 | 2.27 | 3.12 | 2.33 |
| ZrHf | 2.78 | 2.14 | 2.16 | 2.23 | 2.18 | 2.12 | 2.11 |
| ZrTa | 2.54 | 2.19 | 2.15 | 2.25 | 2.16 | 2.07 | 2.10 |
| ZrW  | 2.52 | 2.24 | 2.26 | 2.15 | 1.99 | 2.08 | 2.16 |
| ZrRe | 2.44 | 2.27 | 2.30 | 2.15 | 1.97 | 2.06 | 2.11 |
| ZrOs | 2.43 | 2.32 | 2.23 | 2.14 | 1.93 | 2.08 | 2.03 |
| ZrIr | 2.36 | 2.28 | 2.18 | 2.21 | 2.01 | 1.98 | 2.11 |
| ZrPt | 2.48 | 2.17 | 2.15 | 2.20 | 2.01 | 1.97 | 2.11 |
| ZrAu | 2.65 | 2.07 | 2.12 | 2.23 | 2.03 | 1.97 | 2.13 |
| ZrBi | 2.98 | 2.41 | 2.11 | 2.12 | 2.40 | 3.42 | 2.58 |
| NbMo | 2.36 | 2.23 | 2.19 | 2.03 | 2.00 | 2.14 | 2.16 |
| NbRu | 2.18 | 2.26 | 2.09 | 2.11 | 2.00 | 2.01 | 2.12 |
| NbRh | 2.26 | 2.17 | 2.08 | 2.07 | 1.99 | 2.00 | 2.08 |
| NbPd | 2.40 | 2.12 | 2.14 | 2.03 | 1.98 | 2.01 | 2.07 |
| NbAg | 2.65 | 2.35 | 2.05 | 2.04 | 4.16 | 3.58 | 4.69 |
| NbSn | 2.94 | 2.31 | 2.07 | 2.04 | 2.26 | 3.11 | 2.34 |
| NbHf | 2.62 | 2.09 | 2.08 | 2.17 | 2.18 | 2.11 | 2.15 |
| NbTa | 2.36 | 2.17 | 2.07 | 2.19 | 2.18 | 2.06 | 2.16 |
| NbW  | 2.36 | 2.19 | 2.19 | 2.10 | 2.02 | 2.07 | 2.22 |
| NbRe | 2.27 | 2.26 | 2.14 | 2.10 | 2.00 | 2.04 | 2.13 |
| NbOs | 2.22 | 2.25 | 2.10 | 2.13 | 2.01 | 1.99 | 2.13 |
| NbIr | 2.29 | 2.17 | 2.08 | 2.10 | 1.99 | 1.99 | 2.09 |
| NbPt | 2.40 | 2.12 | 2.14 | 2.06 | 1.98 | 2.00 | 2.08 |
| NbAu | 2.60 | 2.06 | 2.12 | 2.13 | 2.02 | 1.97 | 2.13 |
| NbBi | 2.83 | 2.35 | 2.08 | 2.05 | 2.37 | 3.20 | 2.54 |
| MoRu | 2.07 | 2.18 | 2.06 | 2.05 | 2.01 | 2.02 | 2.15 |
| MoRh | 2.20 | 2.11 | 2.10 | 1.99 | 1.96 | 2.04 | 2.08 |

|      |      |      |      |      |      |      |      |
|------|------|------|------|------|------|------|------|
| MoPd | 2.44 | 2.07 | 2.10 | 2.05 | 2.01 | 1.99 | 2.07 |
| MoAg | 2.54 | 2.04 | 2.13 | 2.06 | 2.04 | 2.04 | 2.11 |
| MoSn | 2.84 | 2.21 | 2.08 | 2.02 | 2.22 | 2.95 | 2.32 |
| MoHf | 2.43 | 2.17 | 2.13 | 2.01 | 2.09 | 2.21 | 2.24 |
| MoTa | 2.33 | 2.17 | 2.14 | 2.00 | 2.03 | 2.16 | 2.22 |
| MoW  | 2.10 | 2.24 | 2.09 | 2.09 | 2.08 | 2.03 | 2.26 |
| MoRe | 2.06 | 2.24 | 2.06 | 2.11 | 2.05 | 1.99 | 2.21 |
| MoOs | 2.13 | 2.19 | 2.05 | 2.08 | 2.00 | 1.99 | 2.12 |
| MoIr | 2.24 | 2.12 | 2.10 | 2.01 | 1.96 | 2.03 | 2.07 |
| MoPt | 2.44 | 2.07 | 2.09 | 2.07 | 1.99 | 1.98 | 2.08 |
| MoAu | 2.54 | 2.05 | 2.11 | 2.08 | 2.02 | 2.00 | 2.13 |
| MoBi | 2.75 | 2.24 | 2.09 | 2.03 | 2.31 | 3.06 | 2.51 |
| RuRh | 2.34 | 2.02 | 2.07 | 1.94 | 1.94 | 2.04 | 2.02 |
| RuPd | 2.47 | 1.98 | 2.05 | 1.96 | 2.00 | 1.99 | 2.05 |
| RuAg | 2.74 | 2.00 | 2.06 | 1.92 | 2.33 | 2.54 | 2.41 |
| RuSn | 2.68 | 2.06 | 2.06 | 1.94 | 2.25 | 2.64 | 2.39 |
| RuHf | 2.29 | 2.06 | 2.07 | 1.95 | 2.12 | 2.16 | 2.34 |
| RuTa | 2.09 | 2.16 | 2.00 | 2.04 | 2.13 | 2.06 | 2.29 |
| RuW  | 2.12 | 2.14 | 2.01 | 2.03 | 2.04 | 2.03 | 2.16 |
| RuRe | 2.16 | 2.11 | 2.04 | 1.96 | 1.96 | 2.05 | 2.07 |
| RuOs | 2.23 | 2.06 | 2.07 | 1.93 | 1.92 | 2.06 | 2.01 |
| RuIr | 2.30 | 2.01 | 2.09 | 1.91 | 1.91 | 2.07 | 1.99 |
| RuPt | 2.46 | 1.99 | 2.05 | 1.98 | 1.99 | 1.98 | 2.05 |
| RuAu | 2.49 | 1.97 | 2.04 | 1.98 | 2.02 | 2.00 | 2.14 |
| RuBi | 2.57 | 2.09 | 2.06 | 1.96 | 2.31 | 2.71 | 2.51 |
| RhPd | 2.46 | 1.98 | 2.03 | 1.96 | 2.00 | 2.02 | 2.05 |
| RhAg | 2.74 | 1.99 | 2.04 | 1.92 | 2.31 | 2.45 | 2.37 |
| RhSn | 2.71 | 2.03 | 2.06 | 1.93 | 2.24 | 2.51 | 2.32 |
| RhHf | 2.22 | 2.13 | 1.99 | 2.02 | 2.15 | 2.12 | 2.29 |
| RhTa | 2.22 | 2.10 | 1.99 | 2.01 | 2.07 | 2.05 | 2.17 |
| RhW  | 2.22 | 2.09 | 2.02 | 1.97 | 1.99 | 2.07 | 2.09 |
| RhRe | 2.24 | 2.05 | 2.07 | 1.94 | 1.92 | 2.08 | 2.01 |
| RhOs | 2.30 | 2.02 | 2.08 | 1.92 | 1.90 | 2.08 | 1.97 |
| RhIr | 2.44 | 2.01 | 2.02 | 1.98 | 1.96 | 2.00 | 1.99 |
| RhPt | 2.45 | 1.99 | 2.04 | 1.98 | 1.98 | 2.00 | 2.03 |
| RhAu | 2.45 | 1.96 | 2.00 | 1.97 | 2.02 | 1.98 | 2.11 |
| RhBi | 2.59 | 2.05 | 2.00 | 1.99 | 2.34 | 2.39 | 2.41 |
| PdAg | 2.43 | 1.97 | 2.01 | 1.97 | 2.02 | 1.99 | 2.05 |
| PdSn | 2.61 | 2.10 | 1.99 | 2.02 | 2.29 | 2.37 | 2.30 |
| PdHf | 2.41 | 2.11 | 1.98 | 2.03 | 2.13 | 2.13 | 2.15 |
| PdTa | 2.36 | 2.09 | 2.01 | 2.00 | 2.03 | 2.11 | 2.10 |
| PdW  | 2.43 | 2.09 | 1.98 | 2.01 | 2.03 | 2.07 | 2.04 |
| PdRe | 2.41 | 2.07 | 2.00 | 2.00 | 1.98 | 2.05 | 2.00 |
| PdOs | 2.46 | 2.07 | 1.99 | 2.01 | 1.95 | 2.03 | 1.97 |
| PdIr | 2.45 | 2.05 | 2.01 | 2.01 | 1.95 | 2.01 | 1.97 |
| PdPt | 2.41 | 2.02 | 1.96 | 1.99 | 1.97 | 1.96 | 2.02 |
| PdAu | 2.42 | 1.97 | 1.98 | 1.98 | 2.00 | 1.97 | 2.06 |
| PdBi | 2.57 | 2.08 | 1.98 | 2.04 | 2.34 | 2.35 | 2.38 |

|      |      |      |      |      |      |      |      |
|------|------|------|------|------|------|------|------|
| AgSn | 2.64 | 2.19 | 2.04 | 2.10 | 2.26 | 2.46 | 2.22 |
| AgHf | 2.64 | 2.13 | 2.00 | 2.06 | 2.16 | 2.12 | 2.03 |
| AgTa | 2.61 | 2.11 | 1.97 | 2.04 | 2.11 | 2.08 | 1.99 |
| AgW  | 2.53 | 2.09 | 2.03 | 2.04 | 2.03 | 2.09 | 2.01 |
| AgRe | 2.73 | 2.47 | 2.72 | 2.38 | 1.96 | 2.05 | 2.08 |
| AgOs | 2.75 | 2.42 | 2.57 | 2.34 | 1.91 | 2.05 | 1.97 |
| AgIr | 2.73 | 2.37 | 2.49 | 2.32 | 1.92 | 2.04 | 1.97 |
| AgPt | 2.44 | 2.04 | 1.98 | 2.02 | 1.96 | 2.00 | 1.97 |
| AgAu | 2.66 | 2.34 | 2.56 | 2.33 | 2.07 | 2.02 | 2.23 |
| AgBi | 2.68 | 2.15 | 2.05 | 2.09 | 2.31 | 2.42 | 2.28 |
| SnHf | 3.04 | 2.34 | 3.20 | 2.28 | 2.07 | 2.08 | 2.36 |
| SnTa | 2.95 | 2.33 | 3.12 | 2.26 | 2.03 | 2.05 | 2.28 |
| SnW  | 2.85 | 2.34 | 2.98 | 2.23 | 2.01 | 2.06 | 2.19 |
| SnRe | 2.80 | 2.35 | 2.85 | 2.22 | 1.97 | 2.06 | 2.13 |
| SnOs | 2.71 | 2.41 | 2.70 | 2.25 | 1.93 | 2.05 | 2.04 |
| SnIr | 2.73 | 2.35 | 2.58 | 2.24 | 1.93 | 2.05 | 2.01 |
| SnPt | 2.63 | 2.32 | 2.36 | 2.32 | 2.00 | 1.98 | 2.08 |
| SnAu | 2.65 | 2.28 | 2.41 | 2.31 | 2.06 | 1.98 | 2.19 |
| SnBi | 2.98 | 2.27 | 2.48 | 2.29 | 2.31 | 2.44 | 2.38 |
| HfTa | 2.65 | 2.14 | 2.11 | 2.18 | 2.14 | 2.07 | 2.09 |
| HfW  | 2.50 | 2.19 | 2.21 | 2.11 | 1.99 | 2.08 | 2.16 |
| HfRe | 2.40 | 2.24 | 2.23 | 2.11 | 1.97 | 2.06 | 2.12 |
| HfOs | 2.37 | 2.28 | 2.18 | 2.09 | 1.92 | 2.09 | 2.04 |
| HfIr | 2.30 | 2.26 | 2.13 | 2.18 | 2.01 | 1.98 | 2.12 |
| HfPt | 2.43 | 2.13 | 2.10 | 2.16 | 2.01 | 1.96 | 2.12 |
| HfAu | 2.61 | 2.05 | 2.09 | 2.18 | 2.03 | 1.97 | 2.14 |
| HfBi | 2.96 | 2.38 | 2.09 | 2.09 | 2.40 | 3.38 | 2.63 |
| TaW  | 2.35 | 2.18 | 2.16 | 2.07 | 2.02 | 2.08 | 2.21 |
| TaRe | 2.22 | 2.28 | 2.09 | 2.11 | 2.02 | 2.01 | 2.14 |
| TaOs | 2.18 | 2.26 | 2.08 | 2.13 | 2.03 | 1.99 | 2.15 |
| TaIr | 2.26 | 2.16 | 2.06 | 2.10 | 2.01 | 1.98 | 2.10 |
| TaPt | 2.38 | 2.10 | 2.10 | 2.06 | 1.99 | 1.99 | 2.10 |
| TaAu | 2.60 | 2.00 | 2.03 | 2.15 | 2.03 | 1.96 | 2.12 |
| TaBi | 2.80 | 2.34 | 2.07 | 2.05 | 2.40 | 3.24 | 2.71 |
| WRe  | 2.13 | 2.22 | 2.04 | 2.09 | 2.05 | 2.00 | 2.19 |
| WOs  | 2.17 | 2.16 | 2.03 | 2.07 | 2.03 | 1.99 | 2.13 |
| WIr  | 2.25 | 2.10 | 2.07 | 2.01 | 1.97 | 2.01 | 2.09 |
| WPt  | 2.44 | 2.05 | 2.07 | 2.04 | 2.00 | 1.98 | 2.08 |
| WAu  | 2.53 | 2.02 | 2.07 | 2.04 | 2.02 | 1.99 | 2.11 |
| WBi  | 2.75 | 2.22 | 2.07 | 2.02 | 2.32 | 3.08 | 2.54 |
| ReOs | 2.20 | 2.10 | 2.05 | 1.98 | 1.96 | 2.02 | 2.09 |
| ReIr | 2.27 | 2.03 | 2.08 | 1.93 | 1.93 | 2.05 | 2.04 |
| RePt | 2.42 | 2.01 | 2.05 | 2.00 | 1.98 | 1.99 | 2.06 |
| ReAu | 2.50 | 2.00 | 2.06 | 2.01 | 2.01 | 1.99 | 2.09 |
| ReBi | 2.62 | 2.14 | 2.07 | 1.98 | 2.35 | 2.89 | 2.55 |
| OsIr | 2.30 | 1.98 | 2.09 | 1.91 | 1.92 | 2.07 | 2.00 |
| OsPt | 2.45 | 1.98 | 2.03 | 1.97 | 1.99 | 1.98 | 2.06 |
| OsAu | 2.50 | 1.96 | 2.03 | 1.97 | 2.02 | 1.98 | 2.11 |

|      |      |      |      |      |      |      |      |
|------|------|------|------|------|------|------|------|
| OsBi | 2.60 | 2.07 | 2.06 | 1.96 | 2.33 | 2.81 | 2.53 |
| IrPt | 2.45 | 1.98 | 2.02 | 1.97 | 1.99 | 2.00 | 2.04 |
| IrAu | 2.46 | 1.95 | 1.98 | 1.96 | 2.03 | 1.99 | 2.10 |
| IrBi | 2.65 | 2.02 | 2.02 | 1.97 | 2.28 | 2.83 | 2.45 |
| PtAu | 2.44 | 1.98 | 1.98 | 1.97 | 2.00 | 1.97 | 2.05 |
| PtBi | 2.58 | 2.08 | 1.97 | 2.03 | 2.36 | 2.35 | 2.40 |
| AuBi | 2.67 | 2.12 | 1.99 | 2.05 | 2.31 | 2.37 | 2.28 |
| AlAl | 2.57 | 1.89 | 2.05 | 1.94 | 1.94 | 2.05 | 1.90 |
| SeSc | 2.87 | 2.02 | 2.18 | 2.11 | 2.11 | 2.18 | 2.02 |
| TiTi | 2.45 | 2.16 | 2.12 | 2.01 | 2.00 | 2.12 | 2.16 |
| VV   | 2.44 | 1.98 | 2.11 | 1.92 | 1.91 | 2.06 | 2.00 |
| CrCr | 2.56 | 1.95 | 2.01 | 1.96 | 1.96 | 2.01 | 1.95 |
| MnMn | 2.43 | 1.98 | 1.97 | 1.95 | 1.93 | 1.96 | 1.97 |
| FeFe | 2.22 | 2.02 | 1.92 | 1.92 | 1.92 | 1.91 | 2.02 |
| CoCo | 2.26 | 1.99 | 1.92 | 1.88 | 1.88 | 1.92 | 1.99 |
| NiNi | 2.37 | 1.95 | 1.87 | 1.90 | 1.90 | 1.87 | 1.95 |
| CuCu | 2.40 | 1.98 | 1.93 | 1.93 | 1.93 | 1.92 | 1.98 |
| ZnZn | 2.57 | 1.91 | 1.95 | 1.92 | 1.92 | 1.95 | 1.91 |
| GaGa | 2.53 | 1.98 | 2.14 | 2.03 | 2.03 | 2.15 | 1.99 |
| YY   | 3.23 | 2.17 | 2.31 | 2.30 | 2.30 | 2.32 | 2.17 |
| ZrZr | 2.75 | 2.14 | 2.16 | 2.22 | 2.22 | 2.16 | 2.14 |
| NbNb | 2.16 | 2.14 | 2.04 | 2.18 | 2.19 | 2.04 | 2.14 |
| MoMo | 1.78 | 2.19 | 2.00 | 2.15 | 2.15 | 2.00 | 2.19 |
| RuRu | 2.22 | 2.04 | 2.08 | 1.93 | 1.93 | 2.08 | 2.04 |
| RhRh | 2.46 | 2.00 | 2.03 | 1.96 | 1.96 | 2.02 | 1.99 |
| PdPd | 2.40 | 2.02 | 1.97 | 1.99 | 1.99 | 1.97 | 2.02 |
| AgAg | 2.62 | 2.27 | 2.45 | 2.29 | 2.15 | 2.13 | 2.24 |
| SnSn | 3.04 | 2.16 | 2.43 | 2.24 | 2.24 | 2.43 | 2.16 |
| HfHf | 2.83 | 2.09 | 2.10 | 2.17 | 2.18 | 2.10 | 2.09 |
| TaTa | 2.19 | 2.15 | 2.05 | 2.18 | 2.18 | 2.04 | 2.15 |
| WW   | 2.17 | 2.22 | 2.05 | 2.08 | 2.08 | 2.03 | 2.23 |
| ReRe | 2.15 | 2.14 | 2.00 | 2.04 | 2.03 | 1.99 | 2.14 |
| OsOs | 2.25 | 2.03 | 2.06 | 1.92 | 1.92 | 2.06 | 2.03 |
| IrIr | 2.44 | 2.01 | 2.00 | 1.97 | 1.97 | 2.00 | 2.01 |
| PtPt | 2.42 | 2.02 | 1.96 | 1.97 | 1.97 | 1.96 | 2.02 |
| AuAu | 2.45 | 2.01 | 1.98 | 1.99 | 2.00 | 1.98 | 2.01 |

**Table S2.** Computed formation energy ( $E_f$ ) and dissolution potential ( $U_{\text{diss}}$ ) of dual-metals, and  $N_e$  are the standard dissolution potential of bulk metal and the number of transferred electrons involved in the dissolution, respectively. The electrochemically unstable systems are depicted by **red** color.  $N_e = [N_e(\text{TM1}) + N_e(\text{TM2})]/2, = /2$ .

| MM2  | $E_{M1M2}$ | $N_e$ | $U_{\text{diss}}^0$ | $E_f$ | $U_{\text{diss}}$ |
|------|------------|-------|---------------------|-------|-------------------|
| AlSc | -633.69    | 3     | -1.87               | -2.61 | -1.00             |
| AlTi | -633.91    | 2.5   | -1.65               | -1.95 | -0.87             |
| AlV  | -634.52    | 2.5   | -1.42               | -1.65 | -0.76             |
| AlCr | -634.98    | 2.5   | -1.29               | -1.61 | -0.64             |
| AlMn | -634.71    | 2.5   | -1.42               | -1.71 | -0.74             |
| AlFe | -633.64    | 2.5   | -1.06               | -1.53 | -0.44             |
| AlCo | -632.50    | 2.5   | -0.97               | -1.64 | -0.32             |
| AlNi | -631.86    | 2.5   | -0.96               | -1.98 | -0.17             |
| AlCu | -629.70    | 2.5   | -0.66               | -1.74 | 0.04              |
| AlZn | -627.27    | 2.5   | -1.21               | -1.94 | -0.43             |
| AlGa | -628.91    | 3     | -1.11               | -1.87 | -0.48             |
| AlY  | -633.67    | 3     | -2.02               | -2.54 | -1.17             |
| AlZr | -634.36    | 3.5   | -1.56               | -1.85 | -1.03             |
| AlNb | -634.77    | 3     | -1.38               | -1.27 | -0.96             |
| AlMo | -634.64    | 3     | -0.93               | -0.83 | -0.65             |
| AlRu | -633.36    | 2.5   | -0.60               | -0.98 | -0.21             |
| AlRh | -632.18    | 2.5   | -0.53               | -1.35 | 0.01              |
| AlPd | -630.93    | 2.5   | -0.36               | -1.82 | 0.37              |
| AlAg | -627.64    | 2     | -0.43               | -1.34 | 0.24              |
| AlSn | -629.35    | 2.5   | -0.90               | -1.61 | -0.26             |
| AlHf | -635.78    | 3.5   | -1.61               | -1.86 | -1.07             |
| AlTa | -636.04    | 3     | -1.13               | -1.03 | -0.79             |
| AlW  | -636.03    | 3     | -0.78               | -0.47 | -0.62             |
| AlRe | -635.37    | 3     | -0.68               | -0.40 | -0.55             |
| AlOs | -634.55    | 5.5   | -0.41               | -0.60 | -0.30             |
| AlIr | -633.17    | 3     | -0.25               | -1.09 | 0.11              |
| AlPt | -631.92    | 2.5   | -0.24               | -1.87 | 0.51              |
| AlAu | -628.16    | 3     | -0.08               | -1.07 | 0.28              |
| AlBi | -628.65    | 2     | -0.58               | -1.31 | 0.08              |
| ScTi | -637.00    | 2.5   | -1.86               | -2.19 | -0.98             |
| ScV  | -637.58    | 2.5   | -1.63               | -1.89 | -0.87             |
| ScCr | -638.04    | 2.5   | -1.50               | -1.84 | -0.76             |
| ScMn | -637.82    | 2.5   | -1.64               | -1.98 | -0.84             |
| ScFe | -636.87    | 2.5   | -1.27               | -1.85 | -0.52             |
| ScCo | -635.96    | 2.5   | -1.18               | -2.07 | -0.35             |
| ScNi | -634.98    | 2.5   | -1.17               | -2.25 | -0.27             |
| ScCu | -632.73    | 2.5   | -0.87               | -1.96 | -0.09             |
| ScZn | -630.65    | 2.5   | -1.42               | -2.33 | -0.49             |
| ScGa | -632.66    | 3     | -1.32               | -2.46 | -0.50             |
| ScY  | -635.93    | 3     | -2.23               | -2.37 | -1.43             |
| ScZr | -636.72    | 3.5   | -1.77               | -1.73 | -1.27             |
| ScNb | -637.17    | 3     | -1.59               | -1.18 | -1.20             |
| ScMo | -637.88    | 3     | -1.14               | -1.16 | -0.75             |
| ScRu | -637.14    | 2.5   | -0.81               | -1.58 | -0.18             |
| ScRh | -635.73    | 2.5   | -0.74               | -1.83 | -0.01             |
| ScPd | -633.84    | 2.5   | -0.57               | -1.98 | 0.23              |
| ScAg | -630.38    | 2     | -0.64               | -1.42 | 0.07              |
| ScSn | -632.94    | 2.5   | -1.11               | -2.11 | -0.27             |
| ScHf | -637.97    | 3.5   | -1.82               | -1.66 | -1.34             |
| ScTa | -639.06    | 3     | -1.34               | -1.24 | -0.93             |
| ScW  | -639.24    | 3     | -0.99               | -0.79 | -0.73             |
| ScRe | -638.75    | 3     | -0.89               | -0.80 | -0.62             |
| ScOs | -638.17    | 5.5   | -0.62               | -1.12 | -0.42             |
| ScIr | -636.69    | 3     | -0.46               | -1.56 | 0.06              |
| ScPt | -634.79    | 2.5   | -0.45               | -2.01 | 0.35              |
| ScAu | -631.01    | 3     | -0.29               | -1.20 | 0.11              |
| ScBi | -632.65    | 2     | -0.79               | -2.02 | 0.22              |



|      |         |     |       |       |       |
|------|---------|-----|-------|-------|-------|
| TiV  | -637.77 | 2   | -1.40 | -1.21 | -0.80 |
| TiCr | -638.31 | 2   | -1.27 | -1.20 | -0.67 |
| TiMn | -638.34 | 2   | -1.41 | -1.45 | -0.68 |
| TiFe | -637.48 | 2   | -1.04 | -1.38 | -0.35 |
| TiCo | -636.76 | 2   | -0.96 | -1.69 | -0.11 |
| TiNi | -635.38 | 2   | -0.95 | -1.66 | -0.11 |
| TiCu | -632.90 | 2   | -0.64 | -1.27 | -0.01 |
| TiZn | -630.68 | 2   | -1.19 | -1.57 | -0.41 |
| TiGa | -632.87 | 2.5 | -1.09 | -1.78 | -0.38 |
| TiY  | -636.41 | 2.5 | -2.00 | -1.84 | -1.27 |
| TiZr | -637.34 | 3   | -1.54 | -1.26 | -1.12 |
| TiNb | -637.93 | 2.5 | -1.37 | -0.77 | -1.06 |
| TiMo | -638.54 | 2.5 | -0.91 | -0.71 | -0.63 |
| TiRu | -637.69 | 2   | -0.59 | -1.07 | -0.05 |
| TiRh | -636.50 | 2   | -0.51 | -1.44 | 0.20  |
| TiPd | -634.19 | 2   | -0.34 | -1.37 | 0.35  |
| TiAg | -630.57 | 1.5 | -0.41 | -0.73 | 0.07  |
| TiSn | -633.23 | 2   | -0.89 | -1.47 | -0.15 |
| TiHf | -638.60 | 3   | -1.59 | -1.19 | -1.19 |
| TiTa | -639.01 | 2.5 | -1.12 | -0.44 | -0.94 |
| TiW  | -639.84 | 2.5 | -0.76 | -0.31 | -0.64 |
| TiRe | -639.42 | 2.5 | -0.66 | -0.36 | -0.52 |
| TiOs | -638.70 | 5   | -0.39 | -0.60 | -0.27 |
| TiIr | -637.62 | 2.5 | -0.24 | -1.24 | 0.26  |
| TiPt | -635.23 | 2   | -0.22 | -1.45 | 0.50  |
| TiAu | -631.18 | 2.5 | -0.06 | -0.51 | 0.14  |
| TiBi | -632.87 | 1.5 | -0.57 | -1.35 | 0.34  |
| VCr  | -638.90 | 2   | -1.05 | -0.90 | -0.60 |
| VMn  | -638.16 | 2   | -1.19 | -0.77 | -0.80 |
| VFe  | -637.48 | 2   | -0.82 | -0.78 | -0.42 |
| VCo  | -637.06 | 2   | -0.73 | -1.25 | -0.11 |
| VNi  | -635.78 | 2   | -0.72 | -1.27 | -0.08 |
| VCu  | -633.52 | 2   | -0.42 | -0.98 | 0.07  |
| VZn  | -631.13 | 2   | -0.97 | -1.20 | -0.37 |
| VGa  | -633.42 | 2.5 | -0.87 | -1.46 | -0.28 |
| VY   | -637.61 | 2.5 | -1.78 | -1.84 | -1.04 |
| VZr  | -638.51 | 3   | -1.32 | -1.25 | -0.90 |
| VNb  | -638.95 | 2.5 | -1.14 | -0.69 | -0.86 |
| VMo  | -638.06 | 2.5 | -0.69 | 0.13  | -0.74 |
| VRu  | -638.27 | 2   | -0.36 | -0.76 | 0.02  |
| VRh  | -636.67 | 2   | -0.29 | -0.92 | 0.17  |
| VPd  | -634.50 | 2   | -0.11 | -0.93 | 0.35  |
| VAg  | -631.65 | 1.5 | -0.19 | -0.68 | 0.26  |
| VSn  | -633.80 | 2   | -0.66 | -1.16 | -0.08 |
| VHf  | -639.39 | 3   | -1.37 | -0.99 | -1.04 |
| VTa  | -640.14 | 2.5 | -0.89 | -0.41 | -0.73 |
| VW   | -640.70 | 2.5 | -0.54 | -0.14 | -0.48 |
| VRe  | -639.94 | 2.5 | -0.44 | -0.02 | -0.43 |
| VOs  | -639.46 | 5   | -0.17 | -0.39 | -0.09 |
| VIr  | -637.81 | 2.5 | -0.01 | -0.75 | 0.29  |
| VPt  | -635.50 | 2   | 0.00  | -0.99 | 0.49  |
| VAu  | -631.74 | 2.5 | 0.16  | -0.19 | 0.24  |
| VBi  | -633.26 | 1.5 | -0.34 | -0.95 | 0.29  |
| CrMn | -639.08 | 2   | -1.05 | -0.95 | -0.57 |
| CrFe | -638.53 | 2   | -0.68 | -1.03 | -0.16 |
| CrCo | -637.36 | 2   | -0.60 | -1.12 | -0.04 |
| CrNi | -636.26 | 2   | -0.59 | -1.24 | 0.03  |
| CrCu | -634.48 | 2   | -0.29 | -1.18 | 0.31  |
| CrZn | -631.59 | 2   | -0.84 | -1.16 | -0.26 |
| CrGa | -634.10 | 2.5 | -0.73 | -1.52 | -0.12 |
| CrY  | -638.02 | 2.5 | -1.64 | -1.77 | -0.93 |
| CrZr | -639.00 | 3   | -1.18 | -1.22 | -0.77 |
| CrNb | -639.41 | 2.5 | -1.01 | -0.64 | -0.75 |
| CrMo | -639.08 | 2.5 | -0.56 | -0.11 | -0.51 |
| CrRu | -638.12 | 2   | -0.23 | -0.41 | -0.02 |
| CrRh | -636.98 | 2   | -0.16 | -0.81 | 0.25  |
| CrPd | -635.12 | 2   | 0.02  | -0.96 | 0.50  |
| CrAg | -632.33 | 1.5 | -0.05 | -0.74 | 0.44  |

|      |         |     |       |       |       |
|------|---------|-----|-------|-------|-------|
| CrSn | -634.33 | 2   | -0.53 | -1.15 | 0.05  |
| CrHf | -640.25 | 3   | -1.23 | -1.14 | -0.85 |
| CrTa | -640.69 | 2.5 | -0.76 | -0.41 | -0.59 |
| CrW  | -640.53 | 2.5 | -0.41 | 0.22  | -0.49 |
| CrRe | -640.09 | 2.5 | -0.31 | 0.18  | -0.38 |
| CrOs | -639.28 | 5   | -0.04 | -0.02 | -0.03 |
| CrIr | -637.93 | 2.5 | 0.12  | -0.53 | 0.34  |
| CrPt | -636.07 | 2   | 0.13  | -1.00 | 0.63  |
| CrAu | -632.62 | 2.5 | 0.30  | -0.36 | 0.44  |
| CrBi | -633.49 | 1.5 | -0.21 | -0.79 | 0.32  |
| MnFe | -637.84 | 2   | -0.82 | -0.92 | -0.36 |
| MnCo | -636.91 | 2   | -0.74 | -1.13 | -0.17 |
| MnNi | -636.17 | 2   | -0.73 | -1.43 | -0.01 |
| MnCu | -633.73 | 2   | -0.42 | -1.05 | 0.10  |
| MnZn | -631.21 | 2   | -0.98 | -1.20 | -0.37 |
| MnGa | -633.35 | 2.5 | -0.87 | -1.39 | -0.31 |
| MnY  | -637.85 | 2.5 | -1.78 | -1.92 | -1.01 |
| MnZr | -638.85 | 3   | -1.32 | -1.39 | -0.86 |
| MnNb | -639.10 | 2.5 | -1.15 | -0.73 | -0.85 |
| MnMo | -639.47 | 2.5 | -0.70 | -0.54 | -0.48 |
| MnRu | -637.80 | 2   | -0.37 | -0.49 | -0.12 |
| MnRh | -636.54 | 2   | -0.30 | -0.83 | 0.12  |
| MnPd | -635.02 | 2   | -0.12 | -1.15 | 0.46  |
| MnAg | -631.37 | 1.5 | -0.19 | -0.50 | 0.14  |
| MnSn | -633.83 | 2   | -0.67 | -1.14 | -0.09 |
| MnHf | -640.18 | 3   | -1.37 | -1.35 | -0.92 |
| MnTa | -640.43 | 2.5 | -0.90 | -0.52 | -0.69 |
| MnW  | -640.67 | 2.5 | -0.54 | -0.09 | -0.51 |
| MnRe | -639.65 | 2.5 | -0.44 | 0.16  | -0.51 |
| MnOs | -639.15 | 5   | -0.18 | -0.20 | -0.14 |
| MnIr | -637.80 | 2.5 | -0.02 | -0.71 | 0.27  |
| MnPt | -636.04 | 2   | -0.01 | -1.22 | 0.61  |
| MnAu | -632.10 | 2.5 | 0.16  | -0.33 | 0.29  |
| MnBi | -632.98 | 1.5 | -0.35 | -0.77 | 0.17  |
| FeCo | -636.09 | 2   | -0.37 | -1.07 | 0.17  |
| FeNi | -634.75 | 2   | -0.36 | -1.07 | 0.18  |
| FeCu | -632.59 | 2   | -0.05 | -0.83 | 0.36  |
| FeZn | -629.95 | 2   | -0.61 | -0.92 | -0.14 |
| FeGa | -631.99 | 2.5 | -0.50 | -1.06 | -0.08 |
| FeY  | -636.87 | 2.5 | -1.41 | -1.79 | -0.70 |
| FeZr | -637.89 | 3   | -0.95 | -1.26 | -0.53 |
| FeNb | -638.49 | 2.5 | -0.78 | -0.78 | -0.46 |
| FeMo | -638.38 | 2.5 | -0.33 | -0.35 | -0.19 |
| FeRu | -636.84 | 2   | 0.01  | -0.36 | 0.19  |
| FeRh | -635.64 | 2   | 0.07  | -0.72 | 0.44  |
| FePd | -633.65 | 2   | 0.25  | -0.82 | 0.66  |
| FeAg | -630.23 | 1.5 | 0.18  | -0.29 | 0.37  |
| FeSn | -632.68 | 2   | -0.30 | -0.92 | 0.16  |
| FeHf | -639.25 | 3   | -1.00 | -1.23 | -0.59 |
| FeTa | -639.97 | 2.5 | -0.53 | -0.64 | -0.27 |
| FeW  | -639.82 | 2.5 | -0.18 | -0.02 | -0.17 |
| FeRe | -639.21 | 2.5 | -0.08 | 0.03  | -0.09 |
| FeOs | -637.91 | 5   | 0.19  | 0.07  | 0.18  |
| FeIr | -636.77 | 2.5 | 0.36  | -0.54 | 0.57  |
| FePt | -634.66 | 2   | 0.37  | -0.89 | 0.81  |
| FeAu | -630.89 | 2.5 | 0.53  | -0.08 | 0.56  |
| FeBi | -632.01 | 1.5 | 0.02  | -0.64 | 0.45  |
| CoNi | -633.56 | 2   | -0.27 | -1.15 | 0.31  |
| CoCu | -631.58 | 2   | 0.03  | -1.00 | 0.53  |
| CoZn | -628.96 | 2   | -0.52 | -1.10 | 0.03  |
| CoGa | -630.83 | 2.5 | -0.42 | -1.16 | 0.05  |
| CoY  | -635.94 | 2.5 | -1.33 | -2.00 | -0.53 |
| CoZr | -637.09 | 3   | -0.87 | -1.53 | -0.35 |
| CoNb | -637.49 | 2.5 | -0.69 | -0.95 | -0.31 |
| CoMo | -637.21 | 2.5 | -0.24 | -0.44 | -0.07 |
| CoRu | -635.43 | 2   | 0.09  | -0.34 | 0.26  |
| CoRh | -634.30 | 2   | 0.16  | -0.73 | 0.53  |
| CoPd | -632.46 | 2   | 0.33  | -0.90 | 0.78  |

|      |         |     |       |       |       |
|------|---------|-----|-------|-------|-------|
| CoAg | -629.26 | 1.5 | 0.26  | -0.47 | 0.58  |
| CoSn | -631.65 | 2   | -0.21 | -1.08 | 0.33  |
| CoHf | -638.53 | 3   | -0.92 | -1.55 | -0.40 |
| CoTa | -638.91 | 2.5 | -0.44 | -0.79 | -0.13 |
| CoW  | -638.75 | 2.5 | -0.09 | -0.16 | -0.03 |
| CoRe | -637.83 | 2.5 | 0.01  | 0.04  | -0.01 |
| CoOs | -636.64 | 5   | 0.28  | 0.03  | 0.27  |
| CoIr | -635.40 | 2.5 | 0.44  | -0.53 | 0.65  |
| CoPt | -633.46 | 2   | 0.45  | -0.96 | 0.93  |
| CoAu | -629.91 | 2.5 | 0.61  | -0.27 | 0.72  |
| CoBi | -630.96 | 1.5 | 0.11  | -0.79 | 0.64  |
| NiCu | -630.42 | 2   | 0.04  | -1.08 | 0.58  |
| NiZn | -628.13 | 2   | -0.51 | -1.36 | 0.17  |
| NiGa | -629.89 | 2.5 | -0.41 | -1.35 | 0.14  |
| NiY  | -634.86 | 2.5 | -1.32 | -2.12 | -0.47 |
| NiZr | -635.88 | 3   | -0.86 | -1.59 | -0.32 |
| NiNb | -636.09 | 2.5 | -0.68 | -0.92 | -0.31 |
| NiMo | -635.62 | 2.5 | -0.23 | -0.30 | -0.11 |
| NiRu | -634.08 | 2   | 0.10  | -0.33 | 0.26  |
| NiRh | -633.05 | 2   | 0.17  | -0.77 | 0.56  |
| NiPd | -631.53 | 2   | 0.35  | -1.10 | 0.89  |
| NiAg | -628.14 | 1.5 | 0.27  | -0.58 | 0.66  |
| NiSn | -630.62 | 2   | -0.20 | -1.23 | 0.41  |
| NiHf | -637.27 | 3   | -0.91 | -1.58 | -0.38 |
| NiTa | -637.50 | 2.5 | -0.43 | -0.75 | -0.13 |
| NiW  | -637.05 | 2.5 | -0.08 | 0.03  | -0.09 |
| NiRe | -636.20 | 2.5 | 0.02  | 0.20  | -0.06 |
| NiOs | -635.31 | 5   | 0.29  | 0.03  | 0.28  |
| NiIr | -634.18 | 2.5 | 0.45  | -0.59 | 0.68  |
| NiPt | -632.52 | 2   | 0.46  | -1.15 | 1.04  |
| NiAu | -628.92 | 2.5 | 0.62  | -0.44 | 0.79  |
| NiBi | -629.99 | 1.5 | 0.12  | -0.97 | 0.77  |
| CuZn | -626.44 | 2   | -0.21 | -1.35 | 0.47  |
| CuGa | -627.84 | 2.5 | -0.11 | -1.16 | 0.36  |
| CuY  | -632.73 | 2.5 | -1.02 | -1.90 | -0.26 |
| CuZr | -633.32 | 3   | -0.55 | -1.15 | -0.17 |
| CuNb | -633.44 | 2.5 | -0.38 | -0.43 | -0.21 |
| CuMo | -633.32 | 2.5 | 0.07  | 0.01  | 0.07  |
| CuRu | -631.98 | 2   | 0.40  | -0.12 | 0.46  |
| CuRh | -631.30 | 2   | 0.47  | -0.73 | 0.84  |
| CuPd | -629.48 | 2   | 0.65  | -0.92 | 1.10  |
| CuAg | -626.13 | 1.5 | 0.57  | -0.42 | 0.85  |
| CuSn | -628.80 | 2   | 0.10  | -1.16 | 0.68  |
| CuHf | -634.75 | 3   | -0.61 | -1.17 | -0.22 |
| CuTa | -634.58 | 2.5 | -0.13 | -0.13 | -0.08 |
| CuW  | -634.50 | 2.5 | 0.22  | 0.47  | 0.03  |
| CuRe | -633.78 | 2.5 | 0.32  | 0.56  | 0.09  |
| CuOs | -633.11 | 5   | 0.59  | 0.29  | 0.53  |
| CuIr | -632.32 | 2.5 | 0.75  | -0.49 | 0.95  |
| CuPt | -630.47 | 2   | 0.76  | -0.97 | 1.24  |
| CuAu | -626.34 | 2.5 | 0.92  | 0.02  | 0.91  |
| CuBi | -627.34 | 1.5 | 0.42  | -0.48 | 0.74  |
| ZnGa | -625.95 | 2.5 | -0.66 | -1.64 | 0.00  |
| ZnY  | -630.71 | 2.5 | -1.57 | -2.30 | -0.64 |
| ZnZr | -631.29 | 3   | -1.11 | -1.55 | -0.59 |
| ZnNb | -631.44 | 2.5 | -0.93 | -0.84 | -0.59 |
| ZnMo | -631.35 | 2.5 | -0.48 | -0.42 | -0.31 |
| ZnRu | -629.93 | 2   | -0.15 | -0.50 | 0.10  |
| ZnRh | -629.01 | 2   | -0.08 | -1.00 | 0.42  |
| ZnPd | -626.88 | 2   | 0.09  | -1.03 | 0.61  |
| ZnAg | -624.32 | 1.5 | 0.02  | -0.92 | 0.64  |
| ZnSn | -626.10 | 2   | -0.45 | -1.23 | 0.16  |
| ZnHf | -632.85 | 3   | -1.16 | -1.63 | -0.61 |
| ZnTa | -632.88 | 2.5 | -0.68 | -0.69 | -0.40 |
| ZnW  | -632.71 | 2.5 | -0.33 | -0.06 | -0.31 |
| ZnRe | -631.87 | 2.5 | -0.23 | 0.10  | -0.27 |
| ZnOs | -631.09 | 5   | 0.04  | -0.12 | 0.06  |
| ZnIr | -629.91 | 2.5 | 0.20  | -0.71 | 0.48  |

|      |         |     |       |       |       |
|------|---------|-----|-------|-------|-------|
| ZnPt | -627.68 | 2   | 0.21  | -0.99 | 0.71  |
| ZnAu | -624.59 | 2.5 | 0.37  | -0.53 | 0.58  |
| ZnBi | -625.24 | 1.5 | -0.13 | -0.85 | 0.44  |
| GaY  | -632.66 | 3   | -1.46 | -2.39 | -0.66 |
| GaZr | -633.31 | 3.5 | -1.00 | -1.67 | -0.52 |
| GaNb | -633.66 | 3   | -0.83 | -1.07 | -0.47 |
| GaMo | -633.39 | 3   | -0.38 | -0.56 | -0.19 |
| GaRu | -631.73 | 2.5 | -0.05 | -0.52 | 0.16  |
| GaRh | -630.91 | 2.5 | 0.02  | -1.07 | 0.45  |
| GaPd | -629.05 | 2.5 | 0.20  | -1.23 | 0.69  |
| GaAg | -626.04 | 2   | 0.13  | -0.90 | 0.58  |
| GaSn | -627.90 | 2.5 | -0.35 | -1.24 | 0.15  |
| GaHf | -634.75 | 3.5 | -1.05 | -1.69 | -0.57 |
| GaTa | -634.91 | 3   | -0.58 | -0.82 | -0.30 |
| GaW  | -634.71 | 3   | -0.23 | -0.17 | -0.17 |
| GaRe | -633.89 | 3   | -0.13 | -0.02 | -0.12 |
| GaOs | -632.97 | 5.5 | 0.14  | -0.17 | 0.18  |
| GaIr | -631.85 | 3   | 0.30  | -0.79 | 0.57  |
| GaPt | -629.98 | 2.5 | 0.31  | -1.25 | 0.82  |
| GaAu | -626.05 | 3   | 0.48  | -0.37 | 0.60  |
| GaBi | -626.72 | 2   | -0.03 | -0.71 | 0.33  |
| YZr  | -636.57 | 3.5 | -1.91 | -1.59 | -1.46 |
| YNb  | -637.03 | 3   | -1.74 | -1.04 | -1.39 |
| YMo  | -637.88 | 3   | -1.29 | -1.09 | -0.92 |
| YRu  | -637.19 | 2.5 | -0.96 | -1.53 | -0.34 |
| YRh  | -635.84 | 2.5 | -0.89 | -1.82 | -0.16 |
| YPd  | -633.79 | 2.5 | -0.71 | -1.89 | 0.04  |
| YAg  | -630.37 | 2   | -0.79 | -1.35 | -0.11 |
| YSn  | -632.83 | 2.5 | -1.26 | -1.99 | -0.46 |
| YHf  | -638.76 | 3.5 | -1.96 | -1.98 | -1.39 |
| YTa  | -639.12 | 3   | -1.49 | -1.21 | -1.08 |
| YW   | -639.23 | 3   | -1.14 | -0.72 | -0.90 |
| YRe  | -638.84 | 3   | -1.04 | -0.78 | -0.77 |
| YOs  | -638.22 | 5.5 | -0.77 | -1.08 | -0.57 |
| YIr  | -636.81 | 3   | -0.61 | -1.56 | -0.09 |
| YPt  | -634.68 | 2.5 | -0.60 | -1.89 | 0.16  |
| YAu  | -631.00 | 3   | -0.44 | -1.13 | -0.06 |
| YBi  | -632.58 | 2   | -0.94 | -1.92 | 0.03  |
| ZrNb | -638.46 | 3.5 | -1.28 | -0.72 | -1.07 |
| ZrMo | -639.05 | 3.5 | -0.83 | -0.64 | -0.64 |
| ZrRu | -638.02 | 3   | -0.50 | -0.91 | -0.19 |
| ZrRh | -636.86 | 3   | -0.43 | -1.29 | 0.00  |
| ZrPd | -634.68 | 3   | -0.25 | -1.29 | 0.18  |
| ZrAg | -630.94 | 2.5 | -0.32 | -0.59 | -0.09 |
| ZrSn | -633.79 | 3   | -0.79 | -1.43 | -0.32 |
| ZrHf | -638.91 | 4   | -1.50 | -1.02 | -1.25 |
| ZrTa | -639.48 | 3.5 | -1.03 | -0.35 | -0.93 |
| ZrW  | -640.36 | 3.5 | -0.67 | -0.24 | -0.61 |
| ZrRe | -639.89 | 3.5 | -0.58 | -0.27 | -0.50 |
| ZrOs | -639.12 | 6   | -0.31 | -0.49 | -0.22 |
| ZrIr | -638.00 | 3.5 | -0.15 | -1.11 | 0.17  |
| ZrPt | -635.76 | 3   | -0.14 | -1.39 | 0.33  |
| ZrAu | -631.65 | 3.5 | 0.03  | -0.42 | 0.14  |
| ZrBi | -633.48 | 2.5 | -0.48 | -1.33 | 0.06  |
| NbMo | -639.40 | 3   | -0.65 | -0.03 | -0.64 |
| NbRu | -638.58 | 2.5 | -0.32 | -0.41 | -0.16 |
| NbRh | -637.14 | 2.5 | -0.25 | -0.65 | 0.01  |
| NbPd | -634.81 | 2.5 | -0.08 | -0.58 | 0.16  |
| NbAg | -632.43 | 2   | -0.15 | -0.56 | 0.13  |
| NbSn | -634.09 | 2.5 | -0.62 | -0.80 | -0.30 |
| NbHf | -639.30 | 3.5 | -1.33 | -0.43 | -1.20 |
| NbTa | -640.36 | 3   | -0.85 | -0.01 | -0.85 |
| NbW  | -640.83 | 3   | -0.50 | 0.30  | -0.60 |
| NbRe | -640.32 | 3   | -0.40 | 0.30  | -0.50 |
| NbOs | -639.96 | 5.5 | -0.13 | -0.13 | -0.11 |
| NbIr | -638.43 | 3   | 0.03  | -0.55 | 0.21  |
| NbPt | -635.92 | 2.5 | 0.04  | -0.69 | 0.32  |
| NbAu | -631.79 | 3   | 0.20  | 0.30  | 0.10  |

|      |         |     |       |       |       |
|------|---------|-----|-------|-------|-------|
| NbBi | -633.74 | 2   | -0.30 | -0.68 | 0.04  |
| MoRu | -638.58 | 2.5 | 0.13  | -0.03 | 0.14  |
| MoRh | -636.87 | 2.5 | 0.20  | -0.14 | 0.26  |
| MoPd | -634.58 | 2.5 | 0.38  | -0.09 | 0.41  |
| MoAg | -630.92 | 2   | 0.30  | 0.57  | 0.02  |
| MoSn | -634.06 | 2.5 | -0.17 | -0.41 | -0.01 |
| MoHf | -640.30 | 3.5 | -0.88 | -0.56 | -0.71 |
| MoTa | -640.77 | 3   | -0.40 | 0.16  | -0.45 |
| MoW  | -641.07 | 3   | -0.05 | 0.56  | -0.24 |
| MoRe | -641.03 | 3   | 0.05  | 0.32  | -0.06 |
| MoOs | -639.96 | 5.5 | 0.32  | 0.24  | 0.28  |
| MoIr | -638.15 | 3   | 0.48  | -0.03 | 0.49  |
| MoPt | -635.72 | 2.5 | 0.49  | -0.22 | 0.58  |
| MoAu | -631.53 | 3   | 0.65  | 0.80  | 0.38  |
| MoBi | -633.59 | 2   | 0.15  | -0.23 | 0.27  |
| RuRh | -635.11 | 2   | 0.53  | -0.05 | 0.56  |
| RuPd | -632.99 | 2   | 0.71  | -0.08 | 0.75  |
| RuAg | -630.11 | 1.5 | 0.63  | 0.19  | 0.51  |
| RuSn | -632.78 | 2   | 0.16  | -0.56 | 0.44  |
| RuHf | -639.45 | 3   | -0.55 | -0.93 | -0.24 |
| RuTa | -640.35 | 2.5 | -0.07 | -0.42 | 0.10  |
| RuW  | -640.19 | 2.5 | 0.28  | 0.21  | 0.20  |
| RuRe | -639.25 | 2.5 | 0.38  | 0.42  | 0.21  |
| RuOs | -637.97 | 5   | 0.65  | 0.45  | 0.56  |
| RuIr | -636.16 | 2.5 | 0.81  | 0.17  | 0.74  |
| RuPt | -634.08 | 2   | 0.82  | -0.18 | 0.91  |
| RuAu | -630.08 | 2.5 | 0.98  | 0.73  | 0.69  |
| RuBi | -632.13 | 1.5 | 0.48  | -0.29 | 0.67  |
| RhPd | -631.88 | 2   | 0.77  | -0.48 | 1.02  |
| RhAg | -629.26 | 1.5 | 0.70  | -0.35 | 0.93  |
| RhSn | -631.79 | 2   | 0.23  | -1.03 | 0.74  |
| RhHf | -638.47 | 3   | -0.48 | -1.40 | -0.01 |
| RhTa | -638.72 | 2.5 | 0.00  | -0.56 | 0.23  |
| RhW  | -638.44 | 2.5 | 0.35  | 0.12  | 0.30  |
| RhRe | -637.46 | 2.5 | 0.45  | 0.36  | 0.31  |
| RhOs | -636.35 | 5   | 0.72  | 0.30  | 0.66  |
| RhIr | -635.16 | 2.5 | 0.88  | -0.28 | 0.99  |
| RhPt | -632.88 | 2   | 0.89  | -0.55 | 1.16  |
| RhAu | -629.28 | 2.5 | 1.05  | 0.18  | 0.98  |
| RuBi | -630.69 | 1.5 | 0.55  | -0.53 | 0.90  |
| PdAg | -627.02 | 1.5 | 0.88  | -0.32 | 1.09  |
| PdSn | -629.55 | 2   | 0.40  | -1.00 | 0.90  |
| PdHf | -636.17 | 3   | -0.30 | -1.34 | 0.15  |
| PdTa | -636.29 | 2.5 | 0.18  | -0.44 | 0.35  |
| PdW  | -635.99 | 2.5 | 0.53  | 0.26  | 0.42  |
| PdRe | -635.07 | 2.5 | 0.63  | 0.46  | 0.44  |
| PdOs | -634.28 | 5   | 0.90  | 0.25  | 0.85  |
| PdIr | -632.93 | 2.5 | 1.06  | -0.26 | 1.16  |
| PdPt | -631.14 | 2   | 1.07  | -0.77 | 1.45  |
| PdAu | -627.69 | 2.5 | 1.23  | -0.12 | 1.27  |
| PdBi | -629.07 | 1.5 | 0.73  | -0.81 | 1.27  |
| AgSn | -626.68 | 1.5 | 0.33  | -0.74 | 0.82  |
| AgHf | -632.38 | 2.5 | -0.38 | -0.61 | -0.13 |
| AgTa | -632.14 | 2   | 0.10  | 0.46  | -0.13 |
| AgW  | -632.08 | 2   | 0.45  | 1.04  | -0.07 |
| AgRe | -632.25 | 2   | 0.55  | 0.70  | 0.20  |
| AgOs | -631.28 | 4.5 | 0.82  | 0.57  | 0.69  |
| AgIr | -630.23 | 2   | 0.98  | -0.09 | 1.02  |
| AgPt | -627.96 | 1.5 | 0.99  | -0.35 | 1.22  |
| AgAu | -624.21 | 2   | 1.15  | 0.45  | 0.93  |
| AgBi | -625.15 | 1   | 0.65  | -0.03 | 0.68  |
| SnHf | -635.43 | 3   | -0.85 | -1.55 | -0.33 |
| SnTa | -635.54 | 2.5 | -0.37 | -0.65 | -0.11 |
| SnW  | -635.40 | 2.5 | -0.02 | -0.03 | -0.01 |
| SnRe | -634.68 | 2.5 | 0.08  | 0.07  | 0.05  |
| SnOs | -633.96 | 5   | 0.35  | -0.18 | 0.39  |
| SnIr | -632.78 | 2.5 | 0.51  | -0.77 | 0.82  |
| SnPt | -630.35 | 2   | 0.52  | -0.95 | 1.00  |

|      |         |     |       |       |       |
|------|---------|-----|-------|-------|-------|
| SnAu | -627.11 | 2.5 | 0.68  | -0.41 | 0.85  |
| SnBi | -627.11 | 1.5 | 0.18  | -0.42 | 0.46  |
| HfTa | -640.67 | 3.5 | -1.08 | -0.25 | -1.00 |
| HfW  | -641.59 | 3.5 | -0.73 | -0.16 | -0.68 |
| HfRe | -641.18 | 3.5 | -0.63 | -0.21 | -0.57 |
| HfOs | -640.42 | 6   | -0.36 | -0.44 | -0.28 |
| HfIr | -639.50 | 3.5 | -0.20 | -1.16 | 0.14  |
| HfPt | -637.22 | 3   | -0.19 | -1.42 | 0.29  |
| HfAu | -633.09 | 3.5 | -0.03 | -0.44 | 0.10  |
| HfBi | -635.04 | 2.5 | -0.53 | -1.41 | 0.04  |
| TaW  | -642.12 | 3   | -0.25 | 0.54  | -0.43 |
| TaRe | -641.71 | 3   | -0.15 | 0.48  | -0.31 |
| TaOs | -641.51 | 5.5 | 0.12  | -0.03 | 0.13  |
| TaIr | -639.95 | 3   | 0.28  | -0.43 | 0.42  |
| TaPt | -637.43 | 2.5 | 0.29  | -0.57 | 0.52  |
| TaAu | -632.94 | 3   | 0.45  | 0.59  | 0.25  |
| TaBi | -635.19 | 2   | -0.05 | -0.53 | 0.22  |
| WRe  | -642.44 | 3   | 0.20  | 0.67  | -0.02 |
| WOs  | -641.56 | 5.5 | 0.47  | 0.49  | 0.38  |
| WIr  | -639.76 | 3   | 0.63  | 0.22  | 0.56  |
| WPt  | -637.16 | 2.5 | 0.64  | 0.12  | 0.59  |
| WAu  | -632.77 | 3   | 0.80  | 1.23  | 0.39  |
| WBi  | -635.03 | 2   | 0.30  | 0.10  | 0.25  |
| ReOs | -640.65 | 5.5 | 0.57  | 0.69  | 0.44  |
| ReIr | -638.72 | 3   | 0.73  | 0.48  | 0.57  |
| RePt | -636.22 | 2.5 | 0.74  | 0.32  | 0.61  |
| ReAu | -631.98 | 3   | 0.90  | 1.37  | 0.44  |
| ReBi | -634.38 | 2   | 0.40  | 0.17  | 0.32  |
| OsIr | -637.54 | 5.5 | 1.00  | 0.45  | 0.92  |
| OsPt | -635.39 | 5   | 1.01  | 0.13  | 0.98  |
| OsAu | -631.24 | 5.5 | 1.17  | 1.12  | 0.97  |
| OsBi | -633.41 | 4.5 | 0.67  | 0.04  | 0.66  |
| IrPt | -634.02 | 2.5 | 1.17  | -0.36 | 1.32  |
| IrAu | -630.36 | 3   | 1.33  | 0.38  | 1.20  |
| IrBi | -631.69 | 2   | 0.83  | -0.28 | 0.97  |
| PtAu | -628.66 | 2.5 | 1.34  | -0.16 | 1.41  |
| PtBi | -630.02 | 1.5 | 0.84  | -0.85 | 1.40  |
| AuBi | -625.78 | 2   | 1.00  | 0.19  | 0.90  |
| AlAl | -630.43 | 3   | -1.66 | -2.28 | -0.90 |
| ScSc | -636.02 | 3   | -2.08 | -2.48 | -1.25 |
| TiTi | -637.47 | 2   | -1.63 | -1.65 | -0.81 |
| VV   | -638.34 | 2   | -1.18 | -0.90 | -0.73 |
| CrCr | -639.50 | 2   | -0.91 | -0.92 | -0.45 |
| MnMn | -638.71 | 2   | -1.19 | -1.01 | -0.68 |
| FeFe | -637.00 | 2   | -0.45 | -0.86 | -0.02 |
| CoCo | -634.71 | 2   | -0.28 | -1.06 | 0.25  |
| NiNi | -632.63 | 2   | -0.26 | -1.35 | 0.41  |
| CuCu | -628.32 | 2   | 0.34  | -0.88 | 0.78  |
| ZnZn | -623.81 | 2   | -0.76 | -1.45 | -0.03 |
| GaGa | -626.92 | 3   | -0.55 | -1.24 | -0.14 |
| YY   | -635.75 | 3   | -2.37 | -2.22 | -1.63 |
| ZrZr | -637.64 | 4   | -1.45 | -1.08 | -1.18 |
| NbNb | -639.39 | 3   | -1.10 | -0.40 | -0.97 |
| MoMo | -640.90 | 3   | -0.20 | -0.40 | -0.07 |
| RuRu | -636.62 | 2   | 0.46  | 0.16  | 0.38  |
| RhRh | -634.02 | 2   | 0.60  | -0.47 | 0.83  |
| PdPd | -630.20 | 2   | 0.95  | -0.73 | 1.32  |
| AgAg | -624.09 | 1   | 0.80  | -0.03 | 0.83  |
| SnSn | -628.05 | 2   | -0.14 | -0.83 | 0.27  |
| HfHf | -640.17 | 4   | -1.55 | -0.95 | -1.31 |
| TaTa | -641.57 | 3   | -0.60 | 0.26  | -0.69 |
| WW   | -642.34 | 3   | 0.10  | 0.97  | -0.22 |
| ReRe | -641.82 | 3   | 0.30  | 0.72  | 0.06  |
| OsOs | -639.40 | 8   | 0.84  | 0.70  | 0.75  |
| IrIr | -636.38 | 3   | 1.16  | -0.15 | 1.21  |
| PtPt | -632.11 | 2   | 1.18  | -0.81 | 1.59  |
| AuAu | -624.28 | 3   | 1.50  | 0.94  | 1.19  |
| BiBi | -626.18 | 1   | 0.50  | 0.00  | 0.50  |

Table S3. Parameter values for machine learning analysis of catalyst stability: AtomNumber (Z), valence-electron number (VP)r, electronegativity ( $\chi$ ), electron affinity (EA), atomic radius (r), First ionization energy (IE), s electron number (Ns)d electron number (Nd), p electron number (Np) of dual-atom.

| Metal | Z1 | Z2 | VP1 | VP2 | $\chi^1$ | $\chi^2$ | EA1  | EA2   | r1  | r2  | IE1  | IE2  | Ns1 | Ns2 | Nd1 | Nd2 | Np1 | Np2 |
|-------|----|----|-----|-----|----------|----------|------|-------|-----|-----|------|------|-----|-----|-----|-----|-----|-----|
| AlSc  | 13 | 21 | 3   | 3   | 1.61     | 1.36     | 0.44 | 0.19  | 118 | 144 | 5.99 | 6.54 | 1   | 2   | 0   | 1   | 2   | 6   |
| AlTi  | 13 | 22 | 3   | 4   | 1.61     | 1.54     | 0.44 | 0.08  | 118 | 132 | 5.99 | 6.82 | 1   | 2   | 0   | 2   | 2   | 0   |
| AlV   | 13 | 23 | 3   | 5   | 1.61     | 1.63     | 0.44 | 0.53  | 118 | 122 | 5.99 | 6.74 | 1   | 1   | 0   | 4   | 2   | 6   |
| AlCr  | 13 | 24 | 3   | 6   | 1.61     | 1.66     | 0.44 | 0.68  | 118 | 118 | 5.99 | 6.77 | 1   | 1   | 0   | 5   | 2   | 0   |
| AlMn  | 13 | 25 | 3   | 7   | 1.61     | 1.55     | 0.44 | -0.50 | 118 | 117 | 5.99 | 7.44 | 1   | 1   | 0   | 6   | 2   | 0   |
| AlFe  | 13 | 26 | 3   | 8   | 1.61     | 1.83     | 0.44 | 0.15  | 118 | 117 | 5.99 | 7.87 | 1   | 1   | 0   | 7   | 2   | 0   |
| AlCo  | 13 | 27 | 3   | 9   | 1.61     | 1.88     | 0.44 | 0.66  | 118 | 116 | 5.99 | 7.86 | 1   | 1   | 0   | 8   | 2   | 0   |
| AlNi  | 13 | 28 | 3   | 10  | 1.61     | 1.91     | 0.44 | 1.16  | 118 | 115 | 5.99 | 7.64 | 1   | 2   | 0   | 8   | 2   | 0   |
| AlCu  | 13 | 29 | 3   | 11  | 1.61     | 1.9      | 0.44 | 1.24  | 118 | 117 | 5.99 | 7.73 | 1   | 1   | 0   | 10  | 2   | 0   |
| AlZn  | 13 | 30 | 3   | 12  | 1.61     | 1.65     | 0.44 | 0.09  | 118 | 125 | 5.99 | 9.40 | 1   | 2   | 0   | 10  | 2   | 0   |
| AlGa  | 13 | 31 | 3   | 3   | 1.61     | 1.81     | 0.44 | 0.30  | 118 | 126 | 5.99 | 6.00 | 1   | 2   | 0   | 0   | 2   | 1   |
| AlY   | 13 | 39 | 3   | 11  | 1.61     | 1.22     | 0.44 | 0.75  | 118 | 162 | 5.99 | 6.39 | 1   | 4   | 0   | 1   | 2   | 6   |
| AlZr  | 13 | 40 | 3   | 4   | 1.61     | 1.33     | 0.44 | 0.43  | 118 | 145 | 5.99 | 6.84 | 1   | 4   | 0   | 2   | 2   | 6   |
| AlNb  | 13 | 41 | 3   | 11  | 1.61     | 1.6      | 0.44 | 0.92  | 118 | 134 | 5.99 | 6.89 | 1   | 1   | 0   | 4   | 2   | 6   |
| AlMo  | 13 | 42 | 3   | 6   | 1.61     | 2.16     | 0.44 | 0.75  | 118 | 130 | 5.99 | 7.10 | 1   | 1   | 0   | 5   | 2   | 6   |
| AlRu  | 13 | 44 | 3   | 8   | 1.61     | 2.2      | 0.44 | 1.05  | 118 | 125 | 5.99 | 7.37 | 1   | 1   | 0   | 7   | 2   | 0   |
| AlRh  | 13 | 45 | 3   | 9   | 1.61     | 2.28     | 0.44 | 1.14  | 118 | 125 | 5.99 | 7.47 | 1   | 1   | 0   | 8   | 2   | 0   |
| AlPd  | 13 | 46 | 3   | 10  | 1.61     | 2.2      | 0.44 | 0.56  | 118 | 128 | 5.99 | 8.35 | 1   | 1   | 0   | 9   | 2   | 0   |
| AlAg  | 13 | 47 | 3   | 11  | 1.61     | 1.93     | 0.44 | 1.30  | 118 | 134 | 5.99 | 7.58 | 1   | 1   | 0   | 10  | 2   | 0   |
| AlSn  | 13 | 50 | 3   | 4   | 1.61     | 1.96     | 0.44 | 1.20  | 118 | 140 | 5.99 | 7.35 | 1   | 2   | 0   | 0   | 2   | 2   |
| AlHF  | 13 | 72 | 3   | 4   | 1.61     | 1.3      | 0.44 | 0.18  | 118 | 144 | 5.99 | 7.00 | 1   | 2   | 0   | 2   | 2   | 0   |
| AlTa  | 13 | 73 | 3   | 11  | 1.61     | 1.5      | 0.44 | 0.32  | 118 | 134 | 5.99 | 7.89 | 1   | 2   | 0   | 3   | 2   | 0   |
| AlW   | 13 | 74 | 3   | 6   | 1.61     | 2.38     | 0.44 | 0.82  | 118 | 130 | 5.99 | 7.98 | 1   | 2   | 0   | 4   | 2   | 0   |
| AlRe  | 13 | 75 | 3   | 7   | 1.61     | 1.9      | 0.44 | 0.06  | 118 | 128 | 5.99 | 7.88 | 1   | 2   | 0   | 5   | 2   | 6   |
| AlOs  | 13 | 76 | 3   | 8   | 1.61     | 2.2      | 0.44 | 1.08  | 118 | 126 | 5.99 | 8.71 | 1   | 2   | 0   | 6   | 2   | 0   |
| AlIr  | 13 | 77 | 3   | 9   | 1.61     | 2.2      | 0.44 | 1.57  | 118 | 127 | 5.99 | 9.12 | 1   | 1   | 0   | 8   | 2   | 0   |
| AlPt  | 13 | 78 | 3   | 10  | 1.61     | 2.28     | 0.44 | 2.13  | 118 | 130 | 5.99 | 9.02 | 1   | 1   | 0   | 9   | 2   | 0   |
| AlAu  | 13 | 79 | 3   | 11  | 1.61     | 2.54     | 0.44 | 2.31  | 118 | 134 | 5.99 | 9.23 | 1   | 1   | 0   | 10  | 2   | 0   |
| AlBi  | 13 | 83 | 3   | 5   | 1.61     | 2.02     | 0.44 | 0.95  | 118 | 146 | 5.99 | 7.29 | 1   | 2   | 0   | 0   | 2   | 3   |
| ScTi  | 21 | 22 | 3   | 4   | 1.36     | 1.54     | 0.19 | 0.08  | 144 | 132 | 6.54 | 6.82 | 2   | 2   | 1   | 2   | 6   | 0   |
| ScV   | 21 | 23 | 3   | 5   | 1.36     | 1.63     | 0.19 | 0.53  | 144 | 122 | 6.54 | 6.74 | 2   | 1   | 1   | 4   | 6   | 6   |
| ScCr  | 21 | 24 | 3   | 6   | 1.36     | 1.66     | 0.19 | 0.68  | 144 | 118 | 6.54 | 6.77 | 2   | 1   | 1   | 5   | 6   | 0   |
| ScMn  | 21 | 25 | 3   | 7   | 1.36     | 1.55     | 0.19 | -0.50 | 144 | 117 | 6.54 | 7.44 | 2   | 1   | 1   | 6   | 6   | 0   |
| ScFe  | 21 | 26 | 3   | 8   | 1.36     | 1.83     | 0.19 | 0.15  | 144 | 117 | 6.54 | 7.87 | 2   | 1   | 1   | 7   | 6   | 0   |
| ScCo  | 21 | 27 | 3   | 9   | 1.36     | 1.88     | 0.19 | 0.66  | 144 | 116 | 6.54 | 7.86 | 2   | 1   | 1   | 8   | 6   | 0   |
| ScNi  | 21 | 28 | 3   | 10  | 1.36     | 1.91     | 0.19 | 1.16  | 144 | 115 | 6.54 | 7.64 | 2   | 2   | 1   | 8   | 6   | 0   |
| ScCu  | 21 | 29 | 3   | 11  | 1.36     | 1.9      | 0.19 | 1.24  | 144 | 117 | 6.54 | 7.73 | 2   | 1   | 1   | 10  | 6   | 0   |
| ScZn  | 21 | 30 | 3   | 12  | 1.36     | 1.65     | 0.19 | 0.09  | 144 | 125 | 6.54 | 9.40 | 2   | 2   | 1   | 10  | 6   | 0   |
| ScGa  | 21 | 31 | 3   | 3   | 1.36     | 1.81     | 0.19 | 0.30  | 144 | 126 | 6.54 | 6.00 | 2   | 2   | 1   | 0   | 6   | 1   |

|      |    |    |   |    |      |      |      |       |     |     |      |      |   |   |   |    |   |   |
|------|----|----|---|----|------|------|------|-------|-----|-----|------|------|---|---|---|----|---|---|
| ScY  | 21 | 39 | 3 | 11 | 1.36 | 1.22 | 0.19 | 0.75  | 144 | 162 | 6.54 | 6.39 | 2 | 4 | 1 | 1  | 6 | 6 |
| ScZr | 21 | 40 | 3 | 4  | 1.36 | 1.33 | 0.19 | 0.43  | 144 | 145 | 6.54 | 6.84 | 2 | 4 | 1 | 2  | 6 | 6 |
| ScNb | 21 | 41 | 3 | 11 | 1.36 | 1.6  | 0.19 | 0.92  | 144 | 134 | 6.54 | 6.89 | 2 | 1 | 1 | 4  | 6 | 6 |
| ScMo | 21 | 42 | 3 | 6  | 1.36 | 2.16 | 0.19 | 0.75  | 144 | 130 | 6.54 | 7.10 | 2 | 1 | 1 | 5  | 6 | 6 |
| ScRu | 21 | 44 | 3 | 8  | 1.36 | 2.2  | 0.19 | 1.05  | 144 | 125 | 6.54 | 7.37 | 2 | 1 | 1 | 7  | 6 | 0 |
| ScRh | 21 | 45 | 3 | 9  | 1.36 | 2.28 | 0.19 | 1.14  | 144 | 125 | 6.54 | 7.47 | 2 | 1 | 1 | 8  | 6 | 0 |
| ScPd | 21 | 46 | 3 | 10 | 1.36 | 2.2  | 0.19 | 0.56  | 144 | 128 | 6.54 | 8.35 | 2 | 1 | 1 | 9  | 6 | 0 |
| ScAg | 21 | 47 | 3 | 11 | 1.36 | 1.93 | 0.19 | 1.30  | 144 | 134 | 6.54 | 7.58 | 2 | 1 | 1 | 10 | 6 | 0 |
| ScSn | 21 | 50 | 3 | 4  | 1.36 | 1.96 | 0.19 | 1.20  | 144 | 140 | 6.54 | 7.35 | 2 | 2 | 1 | 0  | 6 | 2 |
| ScHf | 21 | 72 | 3 | 4  | 1.36 | 1.3  | 0.19 | 0.18  | 144 | 144 | 6.54 | 7.00 | 2 | 2 | 1 | 2  | 6 | 0 |
| ScTa | 21 | 73 | 3 | 11 | 1.36 | 1.5  | 0.19 | 0.32  | 144 | 134 | 6.54 | 7.89 | 2 | 2 | 1 | 3  | 6 | 0 |
| ScW  | 21 | 74 | 3 | 6  | 1.36 | 2.38 | 0.19 | 0.82  | 144 | 130 | 6.54 | 7.98 | 2 | 2 | 1 | 4  | 6 | 0 |
| ScRe | 21 | 75 | 3 | 7  | 1.36 | 1.9  | 0.19 | 0.06  | 144 | 128 | 6.54 | 7.88 | 2 | 2 | 1 | 5  | 6 | 6 |
| ScOs | 21 | 76 | 3 | 8  | 1.36 | 2.2  | 0.19 | 1.08  | 144 | 126 | 6.54 | 8.71 | 2 | 2 | 1 | 6  | 6 | 0 |
| ScIr | 21 | 77 | 3 | 9  | 1.36 | 2.2  | 0.19 | 1.57  | 144 | 127 | 6.54 | 9.12 | 2 | 1 | 1 | 8  | 6 | 0 |
| ScPt | 21 | 78 | 3 | 10 | 1.36 | 2.28 | 0.19 | 2.13  | 144 | 130 | 6.54 | 9.02 | 2 | 1 | 1 | 9  | 6 | 0 |
| ScAu | 21 | 79 | 3 | 11 | 1.36 | 2.54 | 0.19 | 2.31  | 144 | 134 | 6.54 | 9.23 | 2 | 1 | 1 | 10 | 6 | 0 |
| ScBi | 21 | 83 | 3 | 5  | 1.36 | 2.02 | 0.19 | 0.95  | 144 | 146 | 6.54 | 7.29 | 2 | 2 | 1 | 0  | 6 | 3 |
| TiV  | 22 | 23 | 4 | 5  | 1.54 | 1.63 | 0.08 | 0.53  | 132 | 122 | 6.82 | 6.74 | 2 | 1 | 2 | 4  | 0 | 6 |
| TiCr | 22 | 24 | 4 | 6  | 1.54 | 1.66 | 0.08 | 0.68  | 132 | 118 | 6.82 | 6.77 | 2 | 1 | 2 | 5  | 0 | 0 |
| TiMn | 22 | 25 | 4 | 7  | 1.54 | 1.55 | 0.08 | -0.50 | 132 | 117 | 6.82 | 7.44 | 2 | 1 | 2 | 6  | 0 | 0 |
| TiFe | 22 | 26 | 4 | 8  | 1.54 | 1.83 | 0.08 | 0.15  | 132 | 117 | 6.82 | 7.87 | 2 | 1 | 2 | 7  | 0 | 0 |
| TiCo | 22 | 27 | 4 | 9  | 1.54 | 1.88 | 0.08 | 0.66  | 132 | 116 | 6.82 | 7.86 | 2 | 1 | 2 | 8  | 0 | 0 |
| TiNi | 22 | 28 | 4 | 10 | 1.54 | 1.91 | 0.08 | 1.16  | 132 | 115 | 6.82 | 7.64 | 2 | 2 | 2 | 8  | 0 | 0 |
| TiCu | 22 | 29 | 4 | 11 | 1.54 | 1.9  | 0.08 | 1.24  | 132 | 117 | 6.82 | 7.73 | 2 | 1 | 2 | 10 | 0 | 0 |
| TiZn | 22 | 30 | 4 | 12 | 1.54 | 1.65 | 0.08 | 0.09  | 132 | 125 | 6.82 | 9.40 | 2 | 2 | 2 | 10 | 0 | 0 |
| TiGa | 22 | 31 | 4 | 3  | 1.54 | 1.81 | 0.08 | 0.30  | 132 | 126 | 6.82 | 6.00 | 2 | 2 | 2 | 0  | 0 | 1 |
| TiY  | 22 | 39 | 4 | 11 | 1.54 | 1.22 | 0.08 | 0.75  | 132 | 162 | 6.82 | 6.39 | 2 | 4 | 2 | 1  | 0 | 6 |
| TiZr | 22 | 40 | 4 | 4  | 1.54 | 1.33 | 0.08 | 0.43  | 132 | 145 | 6.82 | 6.84 | 2 | 4 | 2 | 2  | 0 | 6 |
| TiNb | 22 | 41 | 4 | 11 | 1.54 | 1.6  | 0.08 | 0.92  | 132 | 134 | 6.82 | 6.89 | 2 | 1 | 2 | 4  | 0 | 6 |
| TiMo | 22 | 42 | 4 | 6  | 1.54 | 2.16 | 0.08 | 0.75  | 132 | 130 | 6.82 | 7.10 | 2 | 1 | 2 | 5  | 0 | 6 |
| TiRu | 22 | 44 | 4 | 8  | 1.54 | 2.2  | 0.08 | 1.05  | 132 | 125 | 6.82 | 7.37 | 2 | 1 | 2 | 7  | 0 | 0 |
| TiRh | 22 | 45 | 4 | 9  | 1.54 | 2.28 | 0.08 | 1.14  | 132 | 125 | 6.82 | 7.47 | 2 | 1 | 2 | 8  | 0 | 0 |
| TiPd | 22 | 46 | 4 | 10 | 1.54 | 2.2  | 0.08 | 0.56  | 132 | 128 | 6.82 | 8.35 | 2 | 1 | 2 | 9  | 0 | 0 |
| TiAg | 22 | 47 | 4 | 11 | 1.54 | 1.93 | 0.08 | 1.30  | 132 | 134 | 6.82 | 7.58 | 2 | 1 | 2 | 10 | 0 | 0 |
| TiSn | 22 | 50 | 4 | 4  | 1.54 | 1.96 | 0.08 | 1.20  | 132 | 140 | 6.82 | 7.35 | 2 | 2 | 2 | 0  | 0 | 2 |
| TiHf | 22 | 72 | 4 | 4  | 1.54 | 1.3  | 0.08 | 0.18  | 132 | 144 | 6.82 | 7.00 | 2 | 2 | 2 | 2  | 0 | 0 |
| TiTa | 22 | 73 | 4 | 11 | 1.54 | 1.5  | 0.08 | 0.32  | 132 | 134 | 6.82 | 7.89 | 2 | 2 | 2 | 3  | 0 | 0 |
| TiW  | 22 | 74 | 4 | 6  | 1.54 | 2.38 | 0.08 | 0.82  | 132 | 130 | 6.82 | 7.98 | 2 | 2 | 2 | 4  | 0 | 0 |
| TiRe | 22 | 75 | 4 | 7  | 1.54 | 1.9  | 0.08 | 0.06  | 132 | 128 | 6.82 | 7.88 | 2 | 2 | 2 | 5  | 0 | 6 |
| TiOs | 22 | 76 | 4 | 8  | 1.54 | 2.2  | 0.08 | 1.08  | 132 | 126 | 6.82 | 8.71 | 2 | 2 | 2 | 6  | 0 | 0 |
| TiIr | 22 | 77 | 4 | 9  | 1.54 | 2.2  | 0.08 | 1.57  | 132 | 127 | 6.82 | 9.12 | 2 | 1 | 2 | 8  | 0 | 0 |
| TiPt | 22 | 78 | 4 | 10 | 1.54 | 2.28 | 0.08 | 2.13  | 132 | 130 | 6.82 | 9.02 | 2 | 1 | 2 | 9  | 0 | 0 |
| TiAu | 22 | 79 | 4 | 11 | 1.54 | 2.54 | 0.08 | 2.31  | 132 | 134 | 6.82 | 9.23 | 2 | 1 | 2 | 10 | 0 | 0 |
| TiBi | 22 | 83 | 4 | 5  | 1.54 | 2.02 | 0.08 | 0.95  | 132 | 146 | 6.82 | 7.29 | 2 | 2 | 2 | 0  | 0 | 3 |
| VCr  | 23 | 24 | 5 | 6  | 1.63 | 1.66 | 0.53 | 0.68  | 122 | 118 | 6.74 | 6.77 | 1 | 1 | 4 | 5  | 6 | 0 |
| VMn  | 23 | 25 | 5 | 7  | 1.63 | 1.55 | 0.53 | -0.50 | 122 | 117 | 6.74 | 7.44 | 1 | 1 | 4 | 6  | 6 | 0 |



|      |    |    |   |    |      |      |      |       |     |     |      |      |   |   |   |    |   |   |
|------|----|----|---|----|------|------|------|-------|-----|-----|------|------|---|---|---|----|---|---|
| VFe  | 23 | 26 | 5 | 8  | 1.63 | 1.83 | 0.53 | 0.15  | 122 | 117 | 6.74 | 7.87 | 1 | 1 | 4 | 7  | 6 | 0 |
| VCo  | 23 | 27 | 5 | 9  | 1.63 | 1.88 | 0.53 | 0.66  | 122 | 116 | 6.74 | 7.86 | 1 | 1 | 4 | 8  | 6 | 0 |
| VNi  | 23 | 28 | 5 | 10 | 1.63 | 1.91 | 0.53 | 1.16  | 122 | 115 | 6.74 | 7.64 | 1 | 2 | 4 | 8  | 6 | 0 |
| VCu  | 23 | 29 | 5 | 11 | 1.63 | 1.9  | 0.53 | 1.24  | 122 | 117 | 6.74 | 7.73 | 1 | 1 | 4 | 10 | 6 | 0 |
| VZn  | 23 | 30 | 5 | 12 | 1.63 | 1.65 | 0.53 | 0.09  | 122 | 125 | 6.74 | 9.40 | 1 | 2 | 4 | 10 | 6 | 0 |
| VGa  | 23 | 31 | 5 | 3  | 1.63 | 1.81 | 0.53 | 0.30  | 122 | 126 | 6.74 | 6.00 | 1 | 2 | 4 | 0  | 6 | 1 |
| VY   | 23 | 39 | 5 | 11 | 1.63 | 1.22 | 0.53 | 0.75  | 122 | 162 | 6.74 | 6.39 | 1 | 4 | 4 | 1  | 6 | 6 |
| VZr  | 23 | 40 | 5 | 4  | 1.63 | 1.33 | 0.53 | 0.43  | 122 | 145 | 6.74 | 6.84 | 1 | 4 | 4 | 2  | 6 | 6 |
| VNb  | 23 | 41 | 5 | 11 | 1.63 | 1.6  | 0.53 | 0.92  | 122 | 134 | 6.74 | 6.89 | 1 | 1 | 4 | 4  | 6 | 6 |
| VMo  | 23 | 42 | 5 | 6  | 1.63 | 2.16 | 0.53 | 0.75  | 122 | 130 | 6.74 | 7.10 | 1 | 1 | 4 | 5  | 6 | 6 |
| VRu  | 23 | 44 | 5 | 8  | 1.63 | 2.2  | 0.53 | 1.05  | 122 | 125 | 6.74 | 7.37 | 1 | 1 | 4 | 7  | 6 | 0 |
| VRh  | 23 | 45 | 5 | 9  | 1.63 | 2.28 | 0.53 | 1.14  | 122 | 125 | 6.74 | 7.47 | 1 | 1 | 4 | 8  | 6 | 0 |
| VPd  | 23 | 46 | 5 | 10 | 1.63 | 2.2  | 0.53 | 0.56  | 122 | 128 | 6.74 | 8.35 | 1 | 1 | 4 | 9  | 6 | 0 |
| VAg  | 23 | 47 | 5 | 11 | 1.63 | 1.93 | 0.53 | 1.30  | 122 | 134 | 6.74 | 7.58 | 1 | 1 | 4 | 10 | 6 | 0 |
| VSn  | 23 | 50 | 5 | 4  | 1.63 | 1.96 | 0.53 | 1.20  | 122 | 140 | 6.74 | 7.35 | 1 | 2 | 4 | 0  | 6 | 2 |
| VHf  | 23 | 72 | 5 | 4  | 1.63 | 1.3  | 0.53 | 0.18  | 122 | 144 | 6.74 | 7.00 | 1 | 2 | 4 | 2  | 6 | 0 |
| VTa  | 23 | 73 | 5 | 11 | 1.63 | 1.5  | 0.53 | 0.32  | 122 | 134 | 6.74 | 7.89 | 1 | 2 | 4 | 3  | 6 | 0 |
| VW   | 23 | 74 | 5 | 6  | 1.63 | 2.38 | 0.53 | 0.82  | 122 | 130 | 6.74 | 7.98 | 1 | 2 | 4 | 4  | 6 | 0 |
| VRe  | 23 | 75 | 5 | 7  | 1.63 | 1.9  | 0.53 | 0.06  | 122 | 128 | 6.74 | 7.88 | 1 | 2 | 4 | 5  | 6 | 6 |
| VOs  | 23 | 76 | 5 | 8  | 1.63 | 2.2  | 0.53 | 1.08  | 122 | 126 | 6.74 | 8.71 | 1 | 2 | 4 | 6  | 6 | 0 |
| VIr  | 23 | 77 | 5 | 9  | 1.63 | 2.2  | 0.53 | 1.57  | 122 | 127 | 6.74 | 9.12 | 1 | 1 | 4 | 8  | 6 | 0 |
| VPt  | 23 | 78 | 5 | 10 | 1.63 | 2.28 | 0.53 | 2.13  | 122 | 130 | 6.74 | 9.02 | 1 | 1 | 4 | 9  | 6 | 0 |
| VAu  | 23 | 79 | 5 | 11 | 1.63 | 2.54 | 0.53 | 2.31  | 122 | 134 | 6.74 | 9.23 | 1 | 1 | 4 | 10 | 6 | 0 |
| VBi  | 23 | 83 | 5 | 5  | 1.63 | 2.02 | 0.53 | 0.95  | 122 | 146 | 6.74 | 7.29 | 1 | 2 | 4 | 0  | 6 | 3 |
| CrMn | 24 | 25 | 6 | 7  | 1.66 | 1.55 | 0.68 | -0.50 | 118 | 117 | 6.77 | 7.44 | 1 | 1 | 5 | 6  | 0 | 0 |
| CrFe | 24 | 26 | 6 | 8  | 1.66 | 1.83 | 0.68 | 0.15  | 118 | 117 | 6.77 | 7.87 | 1 | 1 | 5 | 7  | 0 | 0 |
| CrCo | 24 | 27 | 6 | 9  | 1.66 | 1.88 | 0.68 | 0.66  | 118 | 116 | 6.77 | 7.86 | 1 | 1 | 5 | 8  | 0 | 0 |
| CrNi | 24 | 28 | 6 | 10 | 1.66 | 1.91 | 0.68 | 1.16  | 118 | 115 | 6.77 | 7.64 | 1 | 2 | 5 | 8  | 0 | 0 |
| CrCu | 24 | 29 | 6 | 11 | 1.66 | 1.9  | 0.68 | 1.24  | 118 | 117 | 6.77 | 7.73 | 1 | 1 | 5 | 10 | 0 | 0 |
| CrZn | 24 | 30 | 6 | 12 | 1.66 | 1.65 | 0.68 | 0.09  | 118 | 125 | 6.77 | 9.40 | 1 | 2 | 5 | 10 | 0 | 0 |
| CrGa | 24 | 31 | 6 | 3  | 1.66 | 1.81 | 0.68 | 0.30  | 118 | 126 | 6.77 | 6.00 | 1 | 2 | 5 | 0  | 0 | 1 |
| CrY  | 24 | 39 | 6 | 11 | 1.66 | 1.22 | 0.68 | 0.75  | 118 | 162 | 6.77 | 6.39 | 1 | 4 | 5 | 1  | 0 | 6 |
| CrZr | 24 | 40 | 6 | 4  | 1.66 | 1.33 | 0.68 | 0.43  | 118 | 145 | 6.77 | 6.84 | 1 | 4 | 5 | 2  | 0 | 6 |
| CrNb | 24 | 41 | 6 | 11 | 1.66 | 1.6  | 0.68 | 0.92  | 118 | 134 | 6.77 | 6.89 | 1 | 1 | 5 | 4  | 0 | 6 |
| CrMo | 24 | 42 | 6 | 6  | 1.66 | 2.16 | 0.68 | 0.75  | 118 | 130 | 6.77 | 7.10 | 1 | 1 | 5 | 5  | 0 | 6 |
| CrRu | 24 | 44 | 6 | 8  | 1.66 | 2.2  | 0.68 | 1.05  | 118 | 125 | 6.77 | 7.37 | 1 | 1 | 5 | 7  | 0 | 0 |
| CrRh | 24 | 45 | 6 | 9  | 1.66 | 2.28 | 0.68 | 1.14  | 118 | 125 | 6.77 | 7.47 | 1 | 1 | 5 | 8  | 0 | 0 |
| CrPd | 24 | 46 | 6 | 10 | 1.66 | 2.2  | 0.68 | 0.56  | 118 | 128 | 6.77 | 8.35 | 1 | 1 | 5 | 9  | 0 | 0 |
| CrAg | 24 | 47 | 6 | 11 | 1.66 | 1.93 | 0.68 | 1.30  | 118 | 134 | 6.77 | 7.58 | 1 | 1 | 5 | 10 | 0 | 0 |
| CrSn | 24 | 50 | 6 | 4  | 1.66 | 1.96 | 0.68 | 1.20  | 118 | 140 | 6.77 | 7.35 | 1 | 2 | 5 | 0  | 0 | 2 |
| CrHf | 24 | 72 | 6 | 4  | 1.66 | 1.3  | 0.68 | 0.18  | 118 | 144 | 6.77 | 7.00 | 1 | 2 | 5 | 2  | 0 | 0 |
| CrTa | 24 | 73 | 6 | 11 | 1.66 | 1.5  | 0.68 | 0.32  | 118 | 134 | 6.77 | 7.89 | 1 | 2 | 5 | 3  | 0 | 0 |
| CrW  | 24 | 74 | 6 | 6  | 1.66 | 2.38 | 0.68 | 0.82  | 118 | 130 | 6.77 | 7.98 | 1 | 2 | 5 | 4  | 0 | 0 |
| CrRe | 24 | 75 | 6 | 7  | 1.66 | 1.9  | 0.68 | 0.06  | 118 | 128 | 6.77 | 7.88 | 1 | 2 | 5 | 5  | 0 | 6 |
| CrOs | 24 | 76 | 6 | 8  | 1.66 | 2.2  | 0.68 | 1.08  | 118 | 126 | 6.77 | 8.71 | 1 | 2 | 5 | 6  | 0 | 0 |
| CrIr | 24 | 77 | 6 | 9  | 1.66 | 2.2  | 0.68 | 1.57  | 118 | 127 | 6.77 | 9.12 | 1 | 1 | 5 | 8  | 0 | 0 |
| CrPt | 24 | 78 | 6 | 10 | 1.66 | 2.28 | 0.68 | 2.13  | 118 | 130 | 6.77 | 9.02 | 1 | 1 | 5 | 9  | 0 | 0 |

|      |    |    |   |    |      |      |        |      |     |     |      |      |   |   |   |    |   |   |
|------|----|----|---|----|------|------|--------|------|-----|-----|------|------|---|---|---|----|---|---|
| CrAu | 24 | 79 | 6 | 11 | 1.66 | 2.54 | 0.68   | 2.31 | 118 | 134 | 6.77 | 9.23 | 1 | 1 | 5 | 10 | 0 | 0 |
| CrBi | 24 | 83 | 6 | 5  | 1.66 | 2.02 | 0.68   | 0.95 | 118 | 146 | 6.77 | 7.29 | 1 | 2 | 5 | 0  | 0 | 3 |
| MnFe | 25 | 26 | 7 | 8  | 1.55 | 1.83 | - 0.50 | 0.15 | 117 | 117 | 7.44 | 7.87 | 1 | 1 | 6 | 7  | 0 | 0 |
| MnCo | 25 | 27 | 7 | 9  | 1.55 | 1.88 | - 0.50 | 0.66 | 117 | 116 | 7.44 | 7.86 | 1 | 1 | 6 | 8  | 0 | 0 |
| MnNi | 25 | 28 | 7 | 10 | 1.55 | 1.91 | - 0.50 | 1.16 | 117 | 115 | 7.44 | 7.64 | 1 | 2 | 6 | 8  | 0 | 0 |
| MnCu | 25 | 29 | 7 | 11 | 1.55 | 1.9  | - 0.50 | 1.24 | 117 | 117 | 7.44 | 7.73 | 1 | 1 | 6 | 10 | 0 | 0 |
| MnZn | 25 | 30 | 7 | 12 | 1.55 | 1.65 | - 0.50 | 0.09 | 117 | 125 | 7.44 | 9.40 | 1 | 2 | 6 | 10 | 0 | 0 |
| MnGa | 25 | 31 | 7 | 3  | 1.55 | 1.81 | - 0.50 | 0.30 | 117 | 126 | 7.44 | 6.00 | 1 | 2 | 6 | 0  | 0 | 1 |
| MnY  | 25 | 39 | 7 | 11 | 1.55 | 1.22 | - 0.50 | 0.75 | 117 | 162 | 7.44 | 6.39 | 1 | 4 | 6 | 1  | 0 | 6 |
| MnZr | 25 | 40 | 7 | 4  | 1.55 | 1.33 | - 0.50 | 0.43 | 117 | 145 | 7.44 | 6.84 | 1 | 4 | 6 | 2  | 0 | 6 |
| MnNb | 25 | 41 | 7 | 11 | 1.55 | 1.6  | - 0.50 | 0.92 | 117 | 134 | 7.44 | 6.89 | 1 | 1 | 6 | 4  | 0 | 6 |
| MnMo | 25 | 42 | 7 | 6  | 1.55 | 2.16 | - 0.50 | 0.75 | 117 | 130 | 7.44 | 7.10 | 1 | 1 | 6 | 5  | 0 | 6 |
| MnRu | 25 | 44 | 7 | 8  | 1.55 | 2.2  | - 0.50 | 1.05 | 117 | 125 | 7.44 | 7.37 | 1 | 1 | 6 | 7  | 0 | 0 |
| MnRh | 25 | 45 | 7 | 9  | 1.55 | 2.28 | - 0.50 | 1.14 | 117 | 125 | 7.44 | 7.47 | 1 | 1 | 6 | 8  | 0 | 0 |
| MnPd | 25 | 46 | 7 | 10 | 1.55 | 2.2  | - 0.50 | 0.56 | 117 | 128 | 7.44 | 8.35 | 1 | 1 | 6 | 9  | 0 | 0 |
| MnAg | 25 | 47 | 7 | 11 | 1.55 | 1.93 | - 0.50 | 1.30 | 117 | 134 | 7.44 | 7.58 | 1 | 1 | 6 | 10 | 0 | 0 |
| MnSn | 25 | 50 | 7 | 4  | 1.55 | 1.96 | - 0.50 | 1.20 | 117 | 140 | 7.44 | 7.35 | 1 | 2 | 6 | 0  | 0 | 2 |
| MnHf | 25 | 72 | 7 | 4  | 1.55 | 1.3  | - 0.50 | 0.18 | 117 | 144 | 7.44 | 7.00 | 1 | 2 | 6 | 2  | 0 | 0 |
| MnTa | 25 | 73 | 7 | 11 | 1.55 | 1.5  | - 0.50 | 0.32 | 117 | 134 | 7.44 | 7.89 | 1 | 2 | 6 | 3  | 0 | 0 |
| MnW  | 25 | 74 | 7 | 6  | 1.55 | 2.38 | - 0.50 | 0.82 | 117 | 130 | 7.44 | 7.98 | 1 | 2 | 6 | 4  | 0 | 0 |
| MnRe | 25 | 75 | 7 | 7  | 1.55 | 1.9  | - 0.50 | 0.06 | 117 | 128 | 7.44 | 7.88 | 1 | 2 | 6 | 5  | 0 | 6 |
| MnOs | 25 | 76 | 7 | 8  | 1.55 | 2.2  | - 0.50 | 1.08 | 117 | 126 | 7.44 | 8.71 | 1 | 2 | 6 | 6  | 0 | 0 |
| MnIr | 25 | 77 | 7 | 9  | 1.55 | 2.2  | - 0.50 | 1.57 | 117 | 127 | 7.44 | 9.12 | 1 | 1 | 6 | 8  | 0 | 0 |
| MnPt | 25 | 78 | 7 | 10 | 1.55 | 2.28 | - 0.50 | 2.13 | 117 | 130 | 7.44 | 9.02 | 1 | 1 | 6 | 9  | 0 | 0 |
| MnAu | 25 | 79 | 7 | 11 | 1.55 | 2.54 | - 0.50 | 2.31 | 117 | 134 | 7.44 | 9.23 | 1 | 1 | 6 | 10 | 0 | 0 |
| MnBi | 25 | 83 | 7 | 5  | 1.55 | 2.02 | - 0.50 | 0.95 | 117 | 146 | 7.44 | 7.29 | 1 | 2 | 6 | 0  | 0 | 3 |
| FeCo | 26 | 27 | 8 | 9  | 1.83 | 1.88 | 0.15   | 0.66 | 117 | 116 | 7.87 | 7.86 | 1 | 1 | 7 | 8  | 0 | 0 |
| FeNi | 26 | 28 | 8 | 10 | 1.83 | 1.91 | 0.15   | 1.16 | 117 | 115 | 7.87 | 7.64 | 1 | 2 | 7 | 8  | 0 | 0 |
| FeCu | 26 | 29 | 8 | 11 | 1.83 | 1.9  | 0.15   | 1.24 | 117 | 117 | 7.87 | 7.73 | 1 | 1 | 7 | 10 | 0 | 0 |
| FeZn | 26 | 30 | 8 | 12 | 1.83 | 1.65 | 0.15   | 0.09 | 117 | 125 | 7.87 | 9.40 | 1 | 2 | 7 | 10 | 0 | 0 |
| FeGa | 26 | 31 | 8 | 3  | 1.83 | 1.81 | 0.15   | 0.30 | 117 | 126 | 7.87 | 6.00 | 1 | 2 | 7 | 0  | 0 | 1 |
| FeY  | 26 | 39 | 8 | 11 | 1.83 | 1.22 | 0.15   | 0.75 | 117 | 162 | 7.87 | 6.39 | 1 | 4 | 7 | 1  | 0 | 6 |
| FeZr | 26 | 40 | 8 | 4  | 1.83 | 1.33 | 0.15   | 0.43 | 117 | 145 | 7.87 | 6.84 | 1 | 4 | 7 | 2  | 0 | 6 |
| FeNb | 26 | 41 | 8 | 11 | 1.83 | 1.6  | 0.15   | 0.92 | 117 | 134 | 7.87 | 6.89 | 1 | 1 | 7 | 4  | 0 | 6 |
| FeMo | 26 | 42 | 8 | 6  | 1.83 | 2.16 | 0.15   | 0.75 | 117 | 130 | 7.87 | 7.10 | 1 | 1 | 7 | 5  | 0 | 6 |
| FeRu | 26 | 44 | 8 | 8  | 1.83 | 2.2  | 0.15   | 1.05 | 117 | 125 | 7.87 | 7.37 | 1 | 1 | 7 | 7  | 0 | 0 |
| FeRh | 26 | 45 | 8 | 9  | 1.83 | 2.28 | 0.15   | 1.14 | 117 | 125 | 7.87 | 7.47 | 1 | 1 | 7 | 8  | 0 | 0 |
| FePd | 26 | 46 | 8 | 10 | 1.83 | 2.2  | 0.15   | 0.56 | 117 | 128 | 7.87 | 8.35 | 1 | 1 | 7 | 9  | 0 | 0 |
| FeAg | 26 | 47 | 8 | 11 | 1.83 | 1.93 | 0.15   | 1.30 | 117 | 134 | 7.87 | 7.58 | 1 | 1 | 7 | 10 | 0 | 0 |
| FeSn | 26 | 50 | 8 | 4  | 1.83 | 1.96 | 0.15   | 1.20 | 117 | 140 | 7.87 | 7.35 | 1 | 2 | 7 | 0  | 0 | 2 |
| FeHf | 26 | 72 | 8 | 4  | 1.83 | 1.3  | 0.15   | 0.18 | 117 | 144 | 7.87 | 7.00 | 1 | 2 | 7 | 2  | 0 | 0 |
| FeTa | 26 | 73 | 8 | 11 | 1.83 | 1.5  | 0.15   | 0.32 | 117 | 134 | 7.87 | 7.89 | 1 | 2 | 7 | 3  | 0 | 0 |
| FeW  | 26 | 74 | 8 | 6  | 1.83 | 2.38 | 0.15   | 0.82 | 117 | 130 | 7.87 | 7.98 | 1 | 2 | 7 | 4  | 0 | 0 |
| FeRe | 26 | 75 | 8 | 7  | 1.83 | 1.9  | 0.15   | 0.06 | 117 | 128 | 7.87 | 7.88 | 1 | 2 | 7 | 5  | 0 | 6 |
| FeOs | 26 | 76 | 8 | 8  | 1.83 | 2.2  | 0.15   | 1.08 | 117 | 126 | 7.87 | 8.71 | 1 | 2 | 7 | 6  | 0 | 0 |
| FeIr | 26 | 77 | 8 | 9  | 1.83 | 2.2  | 0.15   | 1.57 | 117 | 127 | 7.87 | 9.12 | 1 | 1 | 7 | 8  | 0 | 0 |
| FePt | 26 | 78 | 8 | 10 | 1.83 | 2.28 | 0.15   | 2.13 | 117 | 130 | 7.87 | 9.02 | 1 | 1 | 7 | 9  | 0 | 0 |

|      |    |    |    |    |      |      |      |      |     |     |      |      |   |   |    |    |   |   |
|------|----|----|----|----|------|------|------|------|-----|-----|------|------|---|---|----|----|---|---|
| FeAu | 26 | 79 | 8  | 11 | 1.83 | 2.54 | 0.15 | 2.31 | 117 | 134 | 7.87 | 9.23 | 1 | 1 | 7  | 10 | 0 | 0 |
| FeBi | 26 | 83 | 8  | 5  | 1.83 | 2.02 | 0.15 | 0.95 | 117 | 146 | 7.87 | 7.29 | 1 | 2 | 7  | 0  | 0 | 3 |
| CoNi | 27 | 28 | 9  | 10 | 1.88 | 1.91 | 0.66 | 1.16 | 116 | 115 | 7.86 | 7.64 | 1 | 2 | 8  | 8  | 0 | 0 |
| CoCu | 27 | 29 | 9  | 11 | 1.88 | 1.9  | 0.66 | 1.24 | 116 | 117 | 7.86 | 7.73 | 1 | 1 | 8  | 10 | 0 | 0 |
| CoZn | 27 | 30 | 9  | 12 | 1.88 | 1.65 | 0.66 | 0.09 | 116 | 125 | 7.86 | 9.40 | 1 | 2 | 8  | 10 | 0 | 0 |
| CoGa | 27 | 31 | 9  | 3  | 1.88 | 1.81 | 0.66 | 0.30 | 116 | 126 | 7.86 | 6.00 | 1 | 2 | 8  | 0  | 0 | 1 |
| CoY  | 27 | 39 | 9  | 11 | 1.88 | 1.22 | 0.66 | 0.75 | 116 | 162 | 7.86 | 6.39 | 1 | 4 | 8  | 1  | 0 | 6 |
| CoZr | 27 | 40 | 9  | 4  | 1.88 | 1.33 | 0.66 | 0.43 | 116 | 145 | 7.86 | 6.84 | 1 | 4 | 8  | 2  | 0 | 6 |
| CoNb | 27 | 41 | 9  | 11 | 1.88 | 1.6  | 0.66 | 0.92 | 116 | 134 | 7.86 | 6.89 | 1 | 1 | 8  | 4  | 0 | 6 |
| CoMo | 27 | 42 | 9  | 6  | 1.88 | 2.16 | 0.66 | 0.75 | 116 | 130 | 7.86 | 7.10 | 1 | 1 | 8  | 5  | 0 | 6 |
| CoRu | 27 | 44 | 9  | 8  | 1.88 | 2.2  | 0.66 | 1.05 | 116 | 125 | 7.86 | 7.37 | 1 | 1 | 8  | 7  | 0 | 0 |
| CoRh | 27 | 45 | 9  | 9  | 1.88 | 2.28 | 0.66 | 1.14 | 116 | 125 | 7.86 | 7.47 | 1 | 1 | 8  | 8  | 0 | 0 |
| CoPd | 27 | 46 | 9  | 10 | 1.88 | 2.2  | 0.66 | 0.56 | 116 | 128 | 7.86 | 8.35 | 1 | 1 | 8  | 9  | 0 | 0 |
| CoAg | 27 | 47 | 9  | 11 | 1.88 | 1.93 | 0.66 | 1.30 | 116 | 134 | 7.86 | 7.58 | 1 | 1 | 8  | 10 | 0 | 0 |
| CoSn | 27 | 50 | 9  | 4  | 1.88 | 1.96 | 0.66 | 1.20 | 116 | 140 | 7.86 | 7.35 | 1 | 2 | 8  | 0  | 0 | 2 |
| CoHf | 27 | 72 | 9  | 4  | 1.88 | 1.3  | 0.66 | 0.18 | 116 | 144 | 7.86 | 7.00 | 1 | 2 | 8  | 2  | 0 | 0 |
| CoTa | 27 | 73 | 9  | 11 | 1.88 | 1.5  | 0.66 | 0.32 | 116 | 134 | 7.86 | 7.89 | 1 | 2 | 8  | 3  | 0 | 0 |
| CoW  | 27 | 74 | 9  | 6  | 1.88 | 2.38 | 0.66 | 0.82 | 116 | 130 | 7.86 | 7.98 | 1 | 2 | 8  | 4  | 0 | 0 |
| CoRe | 27 | 75 | 9  | 7  | 1.88 | 1.9  | 0.66 | 0.06 | 116 | 128 | 7.86 | 7.88 | 1 | 2 | 8  | 5  | 0 | 6 |
| CoOs | 27 | 76 | 9  | 8  | 1.88 | 2.2  | 0.66 | 1.08 | 116 | 126 | 7.86 | 8.71 | 1 | 2 | 8  | 6  | 0 | 0 |
| CoIr | 27 | 77 | 9  | 9  | 1.88 | 2.2  | 0.66 | 1.57 | 116 | 127 | 7.86 | 9.12 | 1 | 1 | 8  | 8  | 0 | 0 |
| CoPt | 27 | 78 | 9  | 10 | 1.88 | 2.28 | 0.66 | 2.13 | 116 | 130 | 7.86 | 9.02 | 1 | 1 | 8  | 9  | 0 | 0 |
| CoAu | 27 | 79 | 9  | 11 | 1.88 | 2.54 | 0.66 | 2.31 | 116 | 134 | 7.86 | 9.23 | 1 | 1 | 8  | 10 | 0 | 0 |
| CoBi | 27 | 83 | 9  | 5  | 1.88 | 2.02 | 0.66 | 0.95 | 116 | 146 | 7.86 | 7.29 | 1 | 2 | 8  | 0  | 0 | 3 |
| NiCu | 28 | 29 | 10 | 11 | 1.91 | 1.9  | 1.16 | 1.24 | 115 | 117 | 7.64 | 7.73 | 2 | 1 | 8  | 10 | 0 | 0 |
| NiZn | 28 | 30 | 10 | 12 | 1.91 | 1.65 | 1.16 | 0.09 | 115 | 125 | 7.64 | 9.40 | 2 | 2 | 8  | 10 | 0 | 0 |
| NiGa | 28 | 31 | 10 | 3  | 1.91 | 1.81 | 1.16 | 0.30 | 115 | 126 | 7.64 | 6.00 | 2 | 2 | 8  | 0  | 0 | 1 |
| NiY  | 28 | 39 | 10 | 11 | 1.91 | 1.22 | 1.16 | 0.75 | 115 | 162 | 7.64 | 6.39 | 2 | 4 | 8  | 1  | 0 | 6 |
| NiZr | 28 | 40 | 10 | 4  | 1.91 | 1.33 | 1.16 | 0.43 | 115 | 145 | 7.64 | 6.84 | 2 | 4 | 8  | 2  | 0 | 6 |
| NiNb | 28 | 41 | 10 | 11 | 1.91 | 1.6  | 1.16 | 0.92 | 115 | 134 | 7.64 | 6.89 | 2 | 1 | 8  | 4  | 0 | 6 |
| NiMo | 28 | 42 | 10 | 6  | 1.91 | 2.16 | 1.16 | 0.75 | 115 | 130 | 7.64 | 7.10 | 2 | 1 | 8  | 5  | 0 | 6 |
| NiRu | 28 | 44 | 10 | 8  | 1.91 | 2.2  | 1.16 | 1.05 | 115 | 125 | 7.64 | 7.37 | 2 | 1 | 8  | 7  | 0 | 0 |
| NiRh | 28 | 45 | 10 | 9  | 1.91 | 2.28 | 1.16 | 1.14 | 115 | 125 | 7.64 | 7.47 | 2 | 1 | 8  | 8  | 0 | 0 |
| NiPd | 28 | 46 | 10 | 10 | 1.91 | 2.2  | 1.16 | 0.56 | 115 | 128 | 7.64 | 8.35 | 2 | 1 | 8  | 9  | 0 | 0 |
| NiAg | 28 | 47 | 10 | 11 | 1.91 | 1.93 | 1.16 | 1.30 | 115 | 134 | 7.64 | 7.58 | 2 | 1 | 8  | 10 | 0 | 0 |
| NiSn | 28 | 50 | 10 | 4  | 1.91 | 1.96 | 1.16 | 1.20 | 115 | 140 | 7.64 | 7.35 | 2 | 2 | 8  | 0  | 0 | 2 |
| NiHf | 28 | 72 | 10 | 4  | 1.91 | 1.3  | 1.16 | 0.18 | 115 | 144 | 7.64 | 7.00 | 2 | 2 | 8  | 2  | 0 | 0 |
| NiTa | 28 | 73 | 10 | 11 | 1.91 | 1.5  | 1.16 | 0.32 | 115 | 134 | 7.64 | 7.89 | 2 | 2 | 8  | 3  | 0 | 0 |
| NiW  | 28 | 74 | 10 | 6  | 1.91 | 2.38 | 1.16 | 0.82 | 115 | 130 | 7.64 | 7.98 | 2 | 2 | 8  | 4  | 0 | 0 |
| NiRe | 28 | 75 | 10 | 7  | 1.91 | 1.9  | 1.16 | 0.06 | 115 | 128 | 7.64 | 7.88 | 2 | 2 | 8  | 5  | 0 | 6 |
| NiOs | 28 | 76 | 10 | 8  | 1.91 | 2.2  | 1.16 | 1.08 | 115 | 126 | 7.64 | 8.71 | 2 | 2 | 8  | 6  | 0 | 0 |
| NiIr | 28 | 77 | 10 | 9  | 1.91 | 2.2  | 1.16 | 1.57 | 115 | 127 | 7.64 | 9.12 | 2 | 1 | 8  | 8  | 0 | 0 |
| NiPt | 28 | 78 | 10 | 10 | 1.91 | 2.28 | 1.16 | 2.13 | 115 | 130 | 7.64 | 9.02 | 2 | 1 | 8  | 9  | 0 | 0 |
| NiAu | 28 | 79 | 10 | 11 | 1.91 | 2.54 | 1.16 | 2.31 | 115 | 134 | 7.64 | 9.23 | 2 | 1 | 8  | 10 | 0 | 0 |
| NiBi | 28 | 83 | 10 | 5  | 1.91 | 2.02 | 1.16 | 0.95 | 115 | 146 | 7.64 | 7.29 | 2 | 2 | 8  | 0  | 0 | 3 |
| CuZn | 29 | 30 | 11 | 12 | 1.9  | 1.65 | 1.24 | 0.09 | 117 | 125 | 7.73 | 9.40 | 1 | 2 | 10 | 10 | 0 | 0 |
| CuGa | 29 | 31 | 11 | 3  | 1.9  | 1.81 | 1.24 | 0.30 | 117 | 126 | 7.73 | 6.00 | 1 | 2 | 10 | 0  | 0 | 1 |

|      |    |    |    |    |      |      |      |      |     |     |      |      |   |   |    |    |   |   |
|------|----|----|----|----|------|------|------|------|-----|-----|------|------|---|---|----|----|---|---|
| CuY  | 29 | 39 | 11 | 11 | 1.9  | 1.22 | 1.24 | 0.75 | 117 | 162 | 7.73 | 6.39 | 1 | 4 | 10 | 1  | 0 | 6 |
| CuZr | 29 | 40 | 11 | 4  | 1.9  | 1.33 | 1.24 | 0.43 | 117 | 145 | 7.73 | 6.84 | 1 | 4 | 10 | 2  | 0 | 6 |
| CuNb | 29 | 41 | 11 | 11 | 1.9  | 1.6  | 1.24 | 0.92 | 117 | 134 | 7.73 | 6.89 | 1 | 1 | 10 | 4  | 0 | 6 |
| CuMo | 29 | 42 | 11 | 6  | 1.9  | 2.16 | 1.24 | 0.75 | 117 | 130 | 7.73 | 7.10 | 1 | 1 | 10 | 5  | 0 | 6 |
| CuRu | 29 | 44 | 11 | 8  | 1.9  | 2.2  | 1.24 | 1.05 | 117 | 125 | 7.73 | 7.37 | 1 | 1 | 10 | 7  | 0 | 0 |
| CuRh | 29 | 45 | 11 | 9  | 1.9  | 2.28 | 1.24 | 1.14 | 117 | 125 | 7.73 | 7.47 | 1 | 1 | 10 | 8  | 0 | 0 |
| CuPd | 29 | 46 | 11 | 10 | 1.9  | 2.2  | 1.24 | 0.56 | 117 | 128 | 7.73 | 8.35 | 1 | 1 | 10 | 9  | 0 | 0 |
| CuAg | 29 | 47 | 11 | 11 | 1.9  | 1.93 | 1.24 | 1.30 | 117 | 134 | 7.73 | 7.58 | 1 | 1 | 10 | 10 | 0 | 0 |
| CuSn | 29 | 50 | 11 | 4  | 1.9  | 1.96 | 1.24 | 1.20 | 117 | 140 | 7.73 | 7.35 | 1 | 2 | 10 | 0  | 0 | 2 |
| CuHf | 29 | 72 | 11 | 4  | 1.9  | 1.3  | 1.24 | 0.18 | 117 | 144 | 7.73 | 7.00 | 1 | 2 | 10 | 2  | 0 | 0 |
| CuTa | 29 | 73 | 11 | 11 | 1.9  | 1.5  | 1.24 | 0.32 | 117 | 134 | 7.73 | 7.89 | 1 | 2 | 10 | 3  | 0 | 0 |
| CuW  | 29 | 74 | 11 | 6  | 1.9  | 2.38 | 1.24 | 0.82 | 117 | 130 | 7.73 | 7.98 | 1 | 2 | 10 | 4  | 0 | 0 |
| CuRe | 29 | 75 | 11 | 7  | 1.9  | 1.9  | 1.24 | 0.06 | 117 | 128 | 7.73 | 7.88 | 1 | 2 | 10 | 5  | 0 | 6 |
| CuOs | 29 | 76 | 11 | 8  | 1.9  | 2.2  | 1.24 | 1.08 | 117 | 126 | 7.73 | 8.71 | 1 | 2 | 10 | 6  | 0 | 0 |
| CuIr | 29 | 77 | 11 | 9  | 1.9  | 2.2  | 1.24 | 1.57 | 117 | 127 | 7.73 | 9.12 | 1 | 1 | 10 | 8  | 0 | 0 |
| CuPt | 29 | 78 | 11 | 10 | 1.9  | 2.28 | 1.24 | 2.13 | 117 | 130 | 7.73 | 9.02 | 1 | 1 | 10 | 9  | 0 | 0 |
| CuAu | 29 | 79 | 11 | 11 | 1.9  | 2.54 | 1.24 | 2.31 | 117 | 134 | 7.73 | 9.23 | 1 | 1 | 10 | 10 | 0 | 0 |
| CuBi | 29 | 83 | 11 | 5  | 1.9  | 2.02 | 1.24 | 0.95 | 117 | 146 | 7.73 | 7.29 | 1 | 2 | 10 | 0  | 0 | 3 |
| ZnGa | 30 | 31 | 12 | 3  | 1.65 | 1.81 | 0.09 | 0.30 | 125 | 126 | 9.40 | 6.00 | 2 | 2 | 10 | 0  | 0 | 1 |
| ZnY  | 30 | 39 | 12 | 11 | 1.65 | 1.22 | 0.09 | 0.75 | 125 | 162 | 9.40 | 6.39 | 2 | 4 | 10 | 1  | 0 | 6 |
| ZnZr | 30 | 40 | 12 | 4  | 1.65 | 1.33 | 0.09 | 0.43 | 125 | 145 | 9.40 | 6.84 | 2 | 4 | 10 | 2  | 0 | 6 |
| ZnNb | 30 | 41 | 12 | 11 | 1.65 | 1.6  | 0.09 | 0.92 | 125 | 134 | 9.40 | 6.89 | 2 | 1 | 10 | 4  | 0 | 6 |
| ZnMo | 30 | 42 | 12 | 6  | 1.65 | 2.16 | 0.09 | 0.75 | 125 | 130 | 9.40 | 7.10 | 2 | 1 | 10 | 5  | 0 | 6 |
| ZnRu | 30 | 44 | 12 | 8  | 1.65 | 2.2  | 0.09 | 1.05 | 125 | 125 | 9.40 | 7.37 | 2 | 1 | 10 | 7  | 0 | 0 |
| ZnRh | 30 | 45 | 12 | 9  | 1.65 | 2.28 | 0.09 | 1.14 | 125 | 125 | 9.40 | 7.47 | 2 | 1 | 10 | 8  | 0 | 0 |
| ZnPd | 30 | 46 | 12 | 10 | 1.65 | 2.2  | 0.09 | 0.56 | 125 | 128 | 9.40 | 8.35 | 2 | 1 | 10 | 9  | 0 | 0 |
| ZnAg | 30 | 47 | 12 | 11 | 1.65 | 1.93 | 0.09 | 1.30 | 125 | 134 | 9.40 | 7.58 | 2 | 1 | 10 | 10 | 0 | 0 |
| ZnSn | 30 | 50 | 12 | 4  | 1.65 | 1.96 | 0.09 | 1.20 | 125 | 140 | 9.40 | 7.35 | 2 | 2 | 10 | 0  | 0 | 2 |
| ZnHf | 30 | 72 | 12 | 4  | 1.65 | 1.3  | 0.09 | 0.18 | 125 | 144 | 9.40 | 7.00 | 2 | 2 | 10 | 2  | 0 | 0 |
| ZnTa | 30 | 73 | 12 | 11 | 1.65 | 1.5  | 0.09 | 0.32 | 125 | 134 | 9.40 | 7.89 | 2 | 2 | 10 | 3  | 0 | 0 |
| ZnW  | 30 | 74 | 12 | 6  | 1.65 | 2.38 | 0.09 | 0.82 | 125 | 130 | 9.40 | 7.98 | 2 | 2 | 10 | 4  | 0 | 0 |
| ZnRe | 30 | 75 | 12 | 7  | 1.65 | 1.9  | 0.09 | 0.06 | 125 | 128 | 9.40 | 7.88 | 2 | 2 | 10 | 5  | 0 | 6 |
| ZnOs | 30 | 76 | 12 | 8  | 1.65 | 2.2  | 0.09 | 1.08 | 125 | 126 | 9.40 | 8.71 | 2 | 2 | 10 | 6  | 0 | 0 |
| ZnIr | 30 | 77 | 12 | 9  | 1.65 | 2.2  | 0.09 | 1.57 | 125 | 127 | 9.40 | 9.12 | 2 | 1 | 10 | 8  | 0 | 0 |
| ZnPt | 30 | 78 | 12 | 10 | 1.65 | 2.28 | 0.09 | 2.13 | 125 | 130 | 9.40 | 9.02 | 2 | 1 | 10 | 9  | 0 | 0 |
| ZnAu | 30 | 79 | 12 | 11 | 1.65 | 2.54 | 0.09 | 2.31 | 125 | 134 | 9.40 | 9.23 | 2 | 1 | 10 | 10 | 0 | 0 |
| ZnBi | 30 | 83 | 12 | 5  | 1.65 | 2.02 | 0.09 | 0.95 | 125 | 146 | 9.40 | 7.29 | 2 | 2 | 10 | 0  | 0 | 3 |
| GaY  | 31 | 39 | 3  | 11 | 1.81 | 1.22 | 0.30 | 0.75 | 126 | 162 | 6.00 | 6.39 | 2 | 4 | 0  | 1  | 1 | 6 |
| GaZr | 31 | 40 | 3  | 4  | 1.81 | 1.33 | 0.30 | 0.43 | 126 | 145 | 6.00 | 6.84 | 2 | 4 | 0  | 2  | 1 | 6 |
| GaNb | 31 | 41 | 3  | 11 | 1.81 | 1.6  | 0.30 | 0.92 | 126 | 134 | 6.00 | 6.89 | 2 | 1 | 0  | 4  | 1 | 6 |
| GaMo | 31 | 42 | 3  | 6  | 1.81 | 2.16 | 0.30 | 0.75 | 126 | 130 | 6.00 | 7.10 | 2 | 1 | 0  | 5  | 1 | 6 |
| GaRu | 31 | 44 | 3  | 8  | 1.81 | 2.2  | 0.30 | 1.05 | 126 | 125 | 6.00 | 7.37 | 2 | 1 | 0  | 7  | 1 | 0 |
| GaRh | 31 | 45 | 3  | 9  | 1.81 | 2.28 | 0.30 | 1.14 | 126 | 125 | 6.00 | 7.47 | 2 | 1 | 0  | 8  | 1 | 0 |
| GaPd | 31 | 46 | 3  | 10 | 1.81 | 2.2  | 0.30 | 0.56 | 126 | 128 | 6.00 | 8.35 | 2 | 1 | 0  | 9  | 1 | 0 |
| GaAg | 31 | 47 | 3  | 11 | 1.81 | 1.93 | 0.30 | 1.30 | 126 | 134 | 6.00 | 7.58 | 2 | 1 | 0  | 10 | 1 | 0 |
| GaSn | 31 | 50 | 3  | 4  | 1.81 | 1.96 | 0.30 | 1.20 | 126 | 140 | 6.00 | 7.35 | 2 | 2 | 0  | 0  | 1 | 2 |
| GaHf | 31 | 72 | 3  | 4  | 1.81 | 1.3  | 0.30 | 0.18 | 126 | 144 | 6.00 | 7.00 | 2 | 2 | 0  | 2  | 1 | 0 |

|      |    |    |    |    |      |      |      |      |     |     |      |      |   |   |   |    |   |   |
|------|----|----|----|----|------|------|------|------|-----|-----|------|------|---|---|---|----|---|---|
| GaTa | 31 | 73 | 3  | 11 | 1.81 | 1.5  | 0.30 | 0.32 | 126 | 134 | 6.00 | 7.89 | 2 | 2 | 0 | 3  | 1 | 0 |
| GaW  | 31 | 74 | 3  | 6  | 1.81 | 2.38 | 0.30 | 0.82 | 126 | 130 | 6.00 | 7.98 | 2 | 2 | 0 | 4  | 1 | 0 |
| GaRe | 31 | 75 | 3  | 7  | 1.81 | 1.9  | 0.30 | 0.06 | 126 | 128 | 6.00 | 7.88 | 2 | 2 | 0 | 5  | 1 | 6 |
| GaOs | 31 | 76 | 3  | 8  | 1.81 | 2.2  | 0.30 | 1.08 | 126 | 126 | 6.00 | 8.71 | 2 | 2 | 0 | 6  | 1 | 0 |
| GaIr | 31 | 77 | 3  | 9  | 1.81 | 2.2  | 0.30 | 1.57 | 126 | 127 | 6.00 | 9.12 | 2 | 1 | 0 | 8  | 1 | 0 |
| GaPt | 31 | 78 | 3  | 10 | 1.81 | 2.28 | 0.30 | 2.13 | 126 | 130 | 6.00 | 9.02 | 2 | 1 | 0 | 9  | 1 | 0 |
| GaAu | 31 | 79 | 3  | 11 | 1.81 | 2.54 | 0.30 | 2.31 | 126 | 134 | 6.00 | 9.23 | 2 | 1 | 0 | 10 | 1 | 0 |
| GaBi | 31 | 83 | 3  | 5  | 1.81 | 2.02 | 0.30 | 0.95 | 126 | 146 | 6.00 | 7.29 | 2 | 2 | 0 | 0  | 1 | 3 |
| YZr  | 39 | 40 | 11 | 4  | 1.22 | 1.33 | 0.75 | 0.43 | 162 | 145 | 6.39 | 6.84 | 4 | 4 | 1 | 2  | 6 | 6 |
| YNb  | 39 | 41 | 11 | 11 | 1.22 | 1.6  | 0.75 | 0.92 | 162 | 134 | 6.39 | 6.89 | 4 | 1 | 1 | 4  | 6 | 6 |
| YMo  | 39 | 42 | 11 | 6  | 1.22 | 2.16 | 0.75 | 0.75 | 162 | 130 | 6.39 | 7.10 | 4 | 1 | 1 | 5  | 6 | 6 |
| YRu  | 39 | 44 | 11 | 8  | 1.22 | 2.2  | 0.75 | 1.05 | 162 | 125 | 6.39 | 7.37 | 4 | 1 | 1 | 7  | 6 | 0 |
| YRh  | 39 | 45 | 11 | 9  | 1.22 | 2.28 | 0.75 | 1.14 | 162 | 125 | 6.39 | 7.47 | 4 | 1 | 1 | 8  | 6 | 0 |
| YPd  | 39 | 46 | 11 | 10 | 1.22 | 2.2  | 0.75 | 0.56 | 162 | 128 | 6.39 | 8.35 | 4 | 1 | 1 | 9  | 6 | 0 |
| YAg  | 39 | 47 | 11 | 11 | 1.22 | 1.93 | 0.75 | 1.30 | 162 | 134 | 6.39 | 7.58 | 4 | 1 | 1 | 10 | 6 | 0 |
| YSn  | 39 | 50 | 11 | 4  | 1.22 | 1.96 | 0.75 | 1.20 | 162 | 140 | 6.39 | 7.35 | 4 | 2 | 1 | 0  | 6 | 2 |
| YTa  | 39 | 73 | 11 | 11 | 1.22 | 1.5  | 0.75 | 0.32 | 162 | 134 | 6.39 | 7.89 | 4 | 2 | 1 | 3  | 6 | 0 |
| YW   | 39 | 74 | 11 | 6  | 1.22 | 2.38 | 0.75 | 0.82 | 162 | 130 | 6.39 | 7.98 | 4 | 2 | 1 | 4  | 6 | 0 |
| YRe  | 39 | 75 | 11 | 7  | 1.22 | 1.9  | 0.75 | 0.06 | 162 | 128 | 6.39 | 7.88 | 4 | 2 | 1 | 5  | 6 | 6 |
| YOs  | 39 | 76 | 11 | 8  | 1.22 | 2.2  | 0.75 | 1.08 | 162 | 126 | 6.39 | 8.71 | 4 | 2 | 1 | 6  | 6 | 0 |
| YIr  | 39 | 77 | 11 | 9  | 1.22 | 2.2  | 0.75 | 1.57 | 162 | 127 | 6.39 | 9.12 | 4 | 1 | 1 | 8  | 6 | 0 |
| YPt  | 39 | 78 | 11 | 10 | 1.22 | 2.28 | 0.75 | 2.13 | 162 | 130 | 6.39 | 9.02 | 4 | 1 | 1 | 9  | 6 | 0 |
| YAu  | 39 | 79 | 11 | 11 | 1.22 | 2.54 | 0.75 | 2.31 | 162 | 134 | 6.39 | 9.23 | 4 | 1 | 1 | 10 | 6 | 0 |
| YBi  | 39 | 83 | 11 | 5  | 1.22 | 2.02 | 0.75 | 0.95 | 162 | 146 | 6.39 | 7.29 | 4 | 2 | 1 | 0  | 6 | 3 |
| ZrMo | 40 | 42 | 4  | 6  | 1.33 | 2.16 | 0.43 | 0.75 | 145 | 130 | 6.84 | 7.10 | 4 | 1 | 2 | 5  | 6 | 6 |
| ZrRu | 40 | 44 | 4  | 8  | 1.33 | 2.2  | 0.43 | 1.05 | 145 | 125 | 6.84 | 7.37 | 4 | 1 | 2 | 7  | 6 | 0 |
| ZrRh | 40 | 45 | 4  | 9  | 1.33 | 2.28 | 0.43 | 1.14 | 145 | 125 | 6.84 | 7.47 | 4 | 1 | 2 | 8  | 6 | 0 |
| ZrPd | 40 | 46 | 4  | 10 | 1.33 | 2.2  | 0.43 | 0.56 | 145 | 128 | 6.84 | 8.35 | 4 | 1 | 2 | 9  | 6 | 0 |
| ZrAg | 40 | 47 | 4  | 11 | 1.33 | 1.93 | 0.43 | 1.30 | 145 | 134 | 6.84 | 7.58 | 4 | 1 | 2 | 10 | 6 | 0 |
| ZrSn | 40 | 50 | 4  | 4  | 1.33 | 1.96 | 0.43 | 1.20 | 145 | 140 | 6.84 | 7.35 | 4 | 2 | 2 | 0  | 6 | 2 |
| ZrHf | 40 | 72 | 4  | 4  | 1.33 | 1.3  | 0.43 | 0.18 | 145 | 144 | 6.84 | 7.00 | 4 | 2 | 2 | 2  | 6 | 0 |
| ZrTa | 40 | 73 | 4  | 11 | 1.33 | 1.5  | 0.43 | 0.32 | 145 | 134 | 6.84 | 7.89 | 4 | 2 | 2 | 3  | 6 | 0 |
| ZrW  | 40 | 74 | 4  | 6  | 1.33 | 2.38 | 0.43 | 0.82 | 145 | 130 | 6.84 | 7.98 | 4 | 2 | 2 | 4  | 6 | 0 |
| ZrRe | 40 | 75 | 4  | 7  | 1.33 | 1.9  | 0.43 | 0.06 | 145 | 128 | 6.84 | 7.88 | 4 | 2 | 2 | 5  | 6 | 6 |
| ZrOs | 40 | 76 | 4  | 8  | 1.33 | 2.2  | 0.43 | 1.08 | 145 | 126 | 6.84 | 8.71 | 4 | 2 | 2 | 6  | 6 | 0 |
| ZrIr | 40 | 77 | 4  | 9  | 1.33 | 2.2  | 0.43 | 1.57 | 145 | 127 | 6.84 | 9.12 | 4 | 1 | 2 | 8  | 6 | 0 |
| ZrPt | 40 | 78 | 4  | 10 | 1.33 | 2.28 | 0.43 | 2.13 | 145 | 130 | 6.84 | 9.02 | 4 | 1 | 2 | 9  | 6 | 0 |
| ZrAu | 40 | 79 | 4  | 11 | 1.33 | 2.54 | 0.43 | 2.31 | 145 | 134 | 6.84 | 9.23 | 4 | 1 | 2 | 10 | 6 | 0 |
| ZrBi | 40 | 83 | 4  | 5  | 1.33 | 2.02 | 0.43 | 0.95 | 145 | 146 | 6.84 | 7.29 | 4 | 2 | 2 | 0  | 6 | 3 |
| NbMo | 41 | 42 | 11 | 6  | 1.6  | 2.16 | 0.92 | 0.75 | 134 | 130 | 6.89 | 7.10 | 1 | 1 | 4 | 5  | 6 | 6 |
| NbRu | 41 | 44 | 11 | 8  | 1.6  | 2.2  | 0.92 | 1.05 | 134 | 125 | 6.89 | 7.37 | 1 | 1 | 4 | 7  | 6 | 0 |
| NbRh | 41 | 45 | 11 | 9  | 1.6  | 2.28 | 0.92 | 1.14 | 134 | 125 | 6.89 | 7.47 | 1 | 1 | 4 | 8  | 6 | 0 |
| NbPd | 41 | 46 | 11 | 10 | 1.6  | 2.2  | 0.92 | 0.56 | 134 | 128 | 6.89 | 8.35 | 1 | 1 | 4 | 9  | 6 | 0 |
| NbAg | 41 | 47 | 11 | 11 | 1.6  | 1.93 | 0.92 | 1.30 | 134 | 134 | 6.89 | 7.58 | 1 | 1 | 4 | 10 | 6 | 0 |
| NbSn | 41 | 50 | 11 | 4  | 1.6  | 1.96 | 0.92 | 1.20 | 134 | 140 | 6.89 | 7.35 | 1 | 2 | 4 | 0  | 6 | 2 |
| NbHf | 41 | 72 | 11 | 4  | 1.6  | 1.3  | 0.92 | 0.18 | 134 | 144 | 6.89 | 7.00 | 1 | 2 | 4 | 2  | 6 | 0 |
| NbTa | 41 | 73 | 11 | 11 | 1.6  | 1.5  | 0.92 | 0.32 | 134 | 134 | 6.89 | 7.89 | 1 | 2 | 4 | 3  | 6 | 0 |

|      |    |    |    |    |      |      |      |      |     |     |      |      |   |   |   |    |   |   |
|------|----|----|----|----|------|------|------|------|-----|-----|------|------|---|---|---|----|---|---|
| NbW  | 41 | 74 | 11 | 6  | 1.6  | 2.38 | 0.92 | 0.82 | 134 | 130 | 6.89 | 7.98 | 1 | 2 | 4 | 4  | 6 | 0 |
| NbRe | 41 | 75 | 11 | 7  | 1.6  | 1.9  | 0.92 | 0.06 | 134 | 128 | 6.89 | 7.88 | 1 | 2 | 4 | 5  | 6 | 6 |
| NbOs | 41 | 76 | 11 | 8  | 1.6  | 2.2  | 0.92 | 1.08 | 134 | 126 | 6.89 | 8.71 | 1 | 2 | 4 | 6  | 6 | 0 |
| NbIr | 41 | 77 | 11 | 9  | 1.6  | 2.2  | 0.92 | 1.57 | 134 | 127 | 6.89 | 9.12 | 1 | 1 | 4 | 8  | 6 | 0 |
| NbPt | 41 | 78 | 11 | 10 | 1.6  | 2.28 | 0.92 | 2.13 | 134 | 130 | 6.89 | 9.02 | 1 | 1 | 4 | 9  | 6 | 0 |
| NbAu | 41 | 79 | 11 | 11 | 1.6  | 2.54 | 0.92 | 2.31 | 134 | 134 | 6.89 | 9.23 | 1 | 1 | 4 | 10 | 6 | 0 |
| NbBi | 41 | 83 | 11 | 5  | 1.6  | 2.02 | 0.92 | 0.95 | 134 | 146 | 6.89 | 7.29 | 1 | 2 | 4 | 0  | 6 | 3 |
| MoRu | 42 | 44 | 6  | 8  | 2.16 | 2.2  | 0.75 | 1.05 | 130 | 125 | 7.10 | 7.37 | 1 | 1 | 5 | 7  | 6 | 0 |
| MoRh | 42 | 45 | 6  | 9  | 2.16 | 2.28 | 0.75 | 1.14 | 130 | 125 | 7.10 | 7.47 | 1 | 1 | 5 | 8  | 6 | 0 |
| MoPd | 42 | 46 | 6  | 10 | 2.16 | 2.2  | 0.75 | 0.56 | 130 | 128 | 7.10 | 8.35 | 1 | 1 | 5 | 9  | 6 | 0 |
| MoAg | 42 | 47 | 6  | 11 | 2.16 | 1.93 | 0.75 | 1.30 | 130 | 134 | 7.10 | 7.58 | 1 | 1 | 5 | 10 | 6 | 0 |
| MoSn | 42 | 50 | 6  | 4  | 2.16 | 1.96 | 0.75 | 1.20 | 130 | 140 | 7.10 | 7.35 | 1 | 2 | 5 | 0  | 6 | 2 |
| MoHf | 42 | 72 | 6  | 4  | 2.16 | 1.3  | 0.75 | 0.18 | 130 | 144 | 7.10 | 7.00 | 1 | 2 | 5 | 2  | 6 | 0 |
| MoTa | 42 | 73 | 6  | 11 | 2.16 | 1.5  | 0.75 | 0.32 | 130 | 134 | 7.10 | 7.89 | 1 | 2 | 5 | 3  | 6 | 0 |
| MoW  | 42 | 74 | 6  | 6  | 2.16 | 2.38 | 0.75 | 0.82 | 130 | 130 | 7.10 | 7.98 | 1 | 2 | 5 | 4  | 6 | 0 |
| MoRe | 42 | 75 | 6  | 7  | 2.16 | 1.9  | 0.75 | 0.06 | 130 | 128 | 7.10 | 7.88 | 1 | 2 | 5 | 5  | 6 | 6 |
| MoOs | 42 | 76 | 6  | 8  | 2.16 | 2.2  | 0.75 | 1.08 | 130 | 126 | 7.10 | 8.71 | 1 | 2 | 5 | 6  | 6 | 0 |
| MoIr | 42 | 77 | 6  | 9  | 2.16 | 2.2  | 0.75 | 1.57 | 130 | 127 | 7.10 | 9.12 | 1 | 1 | 5 | 8  | 6 | 0 |
| MoPt | 42 | 78 | 6  | 10 | 2.16 | 2.28 | 0.75 | 2.13 | 130 | 130 | 7.10 | 9.02 | 1 | 1 | 5 | 9  | 6 | 0 |
| MoAu | 42 | 79 | 6  | 11 | 2.16 | 2.54 | 0.75 | 2.31 | 130 | 134 | 7.10 | 9.23 | 1 | 1 | 5 | 10 | 6 | 0 |
| MoBi | 42 | 83 | 6  | 5  | 2.16 | 2.02 | 0.75 | 0.95 | 130 | 146 | 7.10 | 7.29 | 1 | 2 | 5 | 0  | 6 | 3 |
| RuRh | 44 | 45 | 8  | 9  | 2.2  | 2.28 | 1.05 | 1.14 | 125 | 125 | 7.37 | 7.47 | 1 | 1 | 7 | 8  | 0 | 0 |
| RuPd | 44 | 46 | 8  | 10 | 2.2  | 2.2  | 1.05 | 0.56 | 125 | 128 | 7.37 | 8.35 | 1 | 1 | 7 | 9  | 0 | 0 |
| RuAg | 44 | 47 | 8  | 11 | 2.2  | 1.93 | 1.05 | 1.30 | 125 | 134 | 7.37 | 7.58 | 1 | 1 | 7 | 10 | 0 | 0 |
| RuSn | 44 | 50 | 8  | 4  | 2.2  | 1.96 | 1.05 | 1.20 | 125 | 140 | 7.37 | 7.35 | 1 | 2 | 7 | 0  | 0 | 2 |
| RuHf | 44 | 72 | 8  | 4  | 2.2  | 1.3  | 1.05 | 0.18 | 125 | 144 | 7.37 | 7.00 | 1 | 2 | 7 | 2  | 0 | 0 |
| RuTa | 44 | 73 | 8  | 11 | 2.2  | 1.5  | 1.05 | 0.32 | 125 | 134 | 7.37 | 7.89 | 1 | 2 | 7 | 3  | 0 | 0 |
| RuW  | 44 | 74 | 8  | 6  | 2.2  | 2.38 | 1.05 | 0.82 | 125 | 130 | 7.37 | 7.98 | 1 | 2 | 7 | 4  | 0 | 0 |
| RuRe | 44 | 75 | 8  | 7  | 2.2  | 1.9  | 1.05 | 0.06 | 125 | 128 | 7.37 | 7.88 | 1 | 2 | 7 | 5  | 0 | 6 |
| RuOs | 44 | 76 | 8  | 8  | 2.2  | 2.2  | 1.05 | 1.08 | 125 | 126 | 7.37 | 8.71 | 1 | 2 | 7 | 6  | 0 | 0 |
| RuIr | 44 | 77 | 8  | 9  | 2.2  | 2.2  | 1.05 | 1.57 | 125 | 127 | 7.37 | 9.12 | 1 | 1 | 7 | 8  | 0 | 0 |
| RuPt | 44 | 78 | 8  | 10 | 2.2  | 2.28 | 1.05 | 2.13 | 125 | 130 | 7.37 | 9.02 | 1 | 1 | 7 | 9  | 0 | 0 |
| RuAu | 44 | 79 | 8  | 11 | 2.2  | 2.54 | 1.05 | 2.31 | 125 | 134 | 7.37 | 9.23 | 1 | 1 | 7 | 10 | 0 | 0 |
| RuBi | 44 | 83 | 8  | 5  | 2.2  | 2.02 | 1.05 | 0.95 | 125 | 146 | 7.37 | 7.29 | 1 | 2 | 7 | 0  | 0 | 3 |
| RhPd | 45 | 46 | 9  | 10 | 2.28 | 2.2  | 1.14 | 0.56 | 125 | 128 | 7.47 | 8.35 | 1 | 1 | 8 | 9  | 0 | 0 |
| RhAg | 45 | 47 | 9  | 11 | 2.28 | 1.93 | 1.14 | 1.30 | 125 | 134 | 7.47 | 7.58 | 1 | 1 | 8 | 10 | 0 | 0 |
| RhSn | 45 | 50 | 9  | 4  | 2.28 | 1.96 | 1.14 | 1.20 | 125 | 140 | 7.47 | 7.35 | 1 | 2 | 8 | 0  | 0 | 2 |
| RhHf | 45 | 72 | 9  | 4  | 2.28 | 1.3  | 1.14 | 0.18 | 125 | 144 | 7.47 | 7.00 | 1 | 2 | 8 | 2  | 0 | 0 |
| RhTa | 45 | 73 | 9  | 11 | 2.28 | 1.5  | 1.14 | 0.32 | 125 | 134 | 7.47 | 7.89 | 1 | 2 | 8 | 3  | 0 | 0 |
| RhW  | 45 | 74 | 9  | 6  | 2.28 | 2.38 | 1.14 | 0.82 | 125 | 130 | 7.47 | 7.98 | 1 | 2 | 8 | 4  | 0 | 0 |
| RhRe | 45 | 75 | 9  | 7  | 2.28 | 1.9  | 1.14 | 0.06 | 125 | 128 | 7.47 | 7.88 | 1 | 2 | 8 | 5  | 0 | 6 |
| RhOs | 45 | 76 | 9  | 8  | 2.28 | 2.2  | 1.14 | 1.08 | 125 | 126 | 7.47 | 8.71 | 1 | 2 | 8 | 6  | 0 | 0 |
| RhIr | 45 | 77 | 9  | 9  | 2.28 | 2.2  | 1.14 | 1.57 | 125 | 127 | 7.47 | 9.12 | 1 | 1 | 8 | 8  | 0 | 0 |
| RhPt | 45 | 78 | 9  | 10 | 2.28 | 2.28 | 1.14 | 2.13 | 125 | 130 | 7.47 | 9.02 | 1 | 1 | 8 | 9  | 0 | 0 |
| RhAu | 45 | 79 | 9  | 11 | 2.28 | 2.54 | 1.14 | 2.31 | 125 | 134 | 7.47 | 9.23 | 1 | 1 | 8 | 10 | 0 | 0 |
| RhBi | 45 | 83 | 9  | 5  | 2.28 | 2.02 | 1.14 | 0.95 | 125 | 146 | 7.47 | 7.29 | 1 | 2 | 8 | 0  | 0 | 3 |
| PdAg | 46 | 47 | 10 | 11 | 2.2  | 1.93 | 0.56 | 1.30 | 128 | 134 | 8.35 | 7.58 | 1 | 1 | 9 | 10 | 0 | 0 |

|      |    |    |    |    |      |      |      |      |     |     |      |      |   |   |    |    |   |   |
|------|----|----|----|----|------|------|------|------|-----|-----|------|------|---|---|----|----|---|---|
| PdSn | 46 | 50 | 10 | 4  | 2.2  | 1.96 | 0.56 | 1.20 | 128 | 140 | 8.35 | 7.35 | 1 | 2 | 9  | 0  | 0 | 2 |
| PdHf | 46 | 72 | 10 | 4  | 2.2  | 1.3  | 0.56 | 0.18 | 128 | 144 | 8.35 | 7.00 | 1 | 2 | 9  | 2  | 0 | 0 |
| PdTa | 46 | 73 | 10 | 11 | 2.2  | 1.5  | 0.56 | 0.32 | 128 | 134 | 8.35 | 7.89 | 1 | 2 | 9  | 3  | 0 | 0 |
| PdW  | 46 | 74 | 10 | 6  | 2.2  | 2.38 | 0.56 | 0.82 | 128 | 130 | 8.35 | 7.98 | 1 | 2 | 9  | 4  | 0 | 0 |
| PdRe | 46 | 75 | 10 | 7  | 2.2  | 1.9  | 0.56 | 0.06 | 128 | 128 | 8.35 | 7.88 | 1 | 2 | 9  | 5  | 0 | 6 |
| PdOs | 46 | 76 | 10 | 8  | 2.2  | 2.2  | 0.56 | 1.08 | 128 | 126 | 8.35 | 8.71 | 1 | 2 | 9  | 6  | 0 | 0 |
| PdIr | 46 | 77 | 10 | 9  | 2.2  | 2.2  | 0.56 | 1.57 | 128 | 127 | 8.35 | 9.12 | 1 | 1 | 9  | 8  | 0 | 0 |
| PdPt | 46 | 78 | 10 | 10 | 2.2  | 2.28 | 0.56 | 2.13 | 128 | 130 | 8.35 | 9.02 | 1 | 1 | 9  | 9  | 0 | 0 |
| PdAu | 46 | 79 | 10 | 11 | 2.2  | 2.54 | 0.56 | 2.31 | 128 | 134 | 8.35 | 9.23 | 1 | 1 | 9  | 10 | 0 | 0 |
| PdBi | 46 | 83 | 10 | 5  | 2.2  | 2.02 | 0.56 | 0.95 | 128 | 146 | 8.35 | 7.29 | 1 | 2 | 9  | 0  | 0 | 3 |
| AgSn | 47 | 50 | 11 | 4  | 1.93 | 1.96 | 1.30 | 1.20 | 134 | 140 | 7.58 | 7.35 | 1 | 2 | 10 | 0  | 0 | 2 |
| AgHf | 47 | 72 | 11 | 4  | 1.93 | 1.3  | 1.30 | 0.18 | 134 | 144 | 7.58 | 7.00 | 1 | 2 | 10 | 2  | 0 | 0 |
| AgTa | 47 | 73 | 11 | 11 | 1.93 | 1.5  | 1.30 | 0.32 | 134 | 134 | 7.58 | 7.89 | 1 | 2 | 10 | 3  | 0 | 0 |
| AgW  | 47 | 74 | 11 | 6  | 1.93 | 2.38 | 1.30 | 0.82 | 134 | 130 | 7.58 | 7.98 | 1 | 2 | 10 | 4  | 0 | 0 |
| AgRe | 47 | 75 | 11 | 7  | 1.93 | 1.9  | 1.30 | 0.06 | 134 | 128 | 7.58 | 7.88 | 1 | 2 | 10 | 5  | 0 | 6 |
| AgOs | 47 | 76 | 11 | 8  | 1.93 | 2.2  | 1.30 | 1.08 | 134 | 126 | 7.58 | 8.71 | 1 | 2 | 10 | 6  | 0 | 0 |
| AgIr | 47 | 77 | 11 | 9  | 1.93 | 2.2  | 1.30 | 1.57 | 134 | 127 | 7.58 | 9.12 | 1 | 1 | 10 | 8  | 0 | 0 |
| AgPt | 47 | 78 | 11 | 10 | 1.93 | 2.28 | 1.30 | 2.13 | 134 | 130 | 7.58 | 9.02 | 1 | 1 | 10 | 9  | 0 | 0 |
| AgAu | 47 | 79 | 11 | 11 | 1.93 | 2.54 | 1.30 | 2.31 | 134 | 134 | 7.58 | 9.23 | 1 | 1 | 10 | 10 | 0 | 0 |
| AgBi | 47 | 83 | 11 | 5  | 1.93 | 2.02 | 1.30 | 0.95 | 134 | 146 | 7.58 | 7.29 | 1 | 2 | 10 | 0  | 0 | 3 |
| SnHf | 50 | 72 | 4  | 4  | 1.96 | 1.3  | 1.20 | 0.18 | 140 | 144 | 7.35 | 7.00 | 2 | 2 | 0  | 2  | 2 | 0 |
| SnTa | 50 | 73 | 4  | 11 | 1.96 | 1.5  | 1.20 | 0.32 | 140 | 134 | 7.35 | 7.89 | 2 | 2 | 0  | 3  | 2 | 0 |
| SnW  | 50 | 74 | 4  | 6  | 1.96 | 2.38 | 1.20 | 0.82 | 140 | 130 | 7.35 | 7.98 | 2 | 2 | 0  | 4  | 2 | 0 |
| SnRe | 50 | 75 | 4  | 7  | 1.96 | 1.9  | 1.20 | 0.06 | 140 | 128 | 7.35 | 7.88 | 2 | 2 | 0  | 5  | 2 | 6 |
| SnOs | 50 | 76 | 4  | 8  | 1.96 | 2.2  | 1.20 | 1.08 | 140 | 126 | 7.35 | 8.71 | 2 | 2 | 0  | 6  | 2 | 0 |
| SnIr | 50 | 77 | 4  | 9  | 1.96 | 2.2  | 1.20 | 1.57 | 140 | 127 | 7.35 | 9.12 | 2 | 1 | 0  | 8  | 2 | 0 |
| SnPt | 50 | 78 | 4  | 10 | 1.96 | 2.28 | 1.20 | 2.13 | 140 | 130 | 7.35 | 9.02 | 2 | 1 | 0  | 9  | 2 | 0 |
| SnAu | 50 | 79 | 4  | 11 | 1.96 | 2.54 | 1.20 | 2.31 | 140 | 134 | 7.35 | 9.23 | 2 | 1 | 0  | 10 | 2 | 0 |
| SnBi | 50 | 83 | 4  | 5  | 1.96 | 2.02 | 1.20 | 0.95 | 140 | 146 | 7.35 | 7.29 | 2 | 2 | 0  | 0  | 2 | 3 |
| HfTa | 72 | 73 | 4  | 11 | 1.3  | 1.5  | 0.18 | 0.32 | 144 | 134 | 7.00 | 7.89 | 2 | 2 | 2  | 3  | 0 | 0 |
| HfW  | 72 | 74 | 4  | 6  | 1.3  | 2.38 | 0.18 | 0.82 | 144 | 130 | 7.00 | 7.98 | 2 | 2 | 2  | 4  | 0 | 0 |
| HfRe | 72 | 75 | 4  | 7  | 1.3  | 1.9  | 0.18 | 0.06 | 144 | 128 | 7.00 | 7.88 | 2 | 2 | 2  | 5  | 0 | 6 |
| HfOs | 72 | 76 | 4  | 8  | 1.3  | 2.2  | 0.18 | 1.08 | 144 | 126 | 7.00 | 8.71 | 2 | 2 | 2  | 6  | 0 | 0 |
| HfIr | 72 | 77 | 4  | 9  | 1.3  | 2.2  | 0.18 | 1.57 | 144 | 127 | 7.00 | 9.12 | 2 | 1 | 2  | 8  | 0 | 0 |
| HfPt | 72 | 78 | 4  | 10 | 1.3  | 2.28 | 0.18 | 2.13 | 144 | 130 | 7.00 | 9.02 | 2 | 1 | 2  | 9  | 0 | 0 |
| HfAu | 72 | 79 | 4  | 11 | 1.3  | 2.54 | 0.18 | 2.31 | 144 | 134 | 7.00 | 9.23 | 2 | 1 | 2  | 10 | 0 | 0 |
| HfBi | 72 | 83 | 4  | 5  | 1.3  | 2.02 | 0.18 | 0.95 | 144 | 146 | 7.00 | 7.29 | 2 | 2 | 2  | 0  | 0 | 3 |
| TaW  | 73 | 74 | 11 | 6  | 1.5  | 2.38 | 0.32 | 0.82 | 134 | 130 | 7.89 | 7.98 | 2 | 2 | 3  | 4  | 0 | 0 |
| TaRe | 73 | 75 | 11 | 7  | 1.5  | 1.9  | 0.32 | 0.06 | 134 | 128 | 7.89 | 7.88 | 2 | 2 | 3  | 5  | 0 | 6 |
| TaOs | 73 | 76 | 11 | 8  | 1.5  | 2.2  | 0.32 | 1.08 | 134 | 126 | 7.89 | 8.71 | 2 | 2 | 3  | 6  | 0 | 0 |
| TaIr | 73 | 77 | 11 | 9  | 1.5  | 2.2  | 0.32 | 1.57 | 134 | 127 | 7.89 | 9.12 | 2 | 1 | 3  | 8  | 0 | 0 |
| TaPt | 73 | 78 | 11 | 10 | 1.5  | 2.28 | 0.32 | 2.13 | 134 | 130 | 7.89 | 9.02 | 2 | 1 | 3  | 9  | 0 | 0 |
| TaAu | 73 | 79 | 11 | 11 | 1.5  | 2.54 | 0.32 | 2.31 | 134 | 134 | 7.89 | 9.23 | 2 | 1 | 3  | 10 | 0 | 0 |
| TaBi | 73 | 83 | 11 | 5  | 1.5  | 2.02 | 0.32 | 0.95 | 134 | 146 | 7.89 | 7.29 | 2 | 2 | 3  | 0  | 0 | 3 |
| WRe  | 74 | 75 | 6  | 7  | 2.38 | 1.9  | 0.82 | 0.06 | 130 | 128 | 7.98 | 7.88 | 2 | 2 | 4  | 5  | 0 | 6 |
| WOs  | 74 | 76 | 6  | 8  | 2.38 | 2.2  | 0.82 | 1.08 | 130 | 126 | 7.98 | 8.71 | 2 | 2 | 4  | 6  | 0 | 0 |
| WIr  | 74 | 77 | 6  | 9  | 2.38 | 2.2  | 0.82 | 1.57 | 130 | 127 | 7.98 | 9.12 | 2 | 1 | 4  | 8  | 0 | 0 |

|      |    |    |    |    |      |      |        |        |     |     |      |      |   |   |    |    |   |   |
|------|----|----|----|----|------|------|--------|--------|-----|-----|------|------|---|---|----|----|---|---|
| WPt  | 74 | 78 | 6  | 10 | 2.38 | 2.28 | 0.82   | 2.13   | 130 | 130 | 7.98 | 9.02 | 2 | 1 | 4  | 9  | 0 | 0 |
| WAu  | 74 | 79 | 6  | 11 | 2.38 | 2.54 | 0.82   | 2.31   | 130 | 134 | 7.98 | 9.23 | 2 | 1 | 4  | 10 | 0 | 0 |
| WBi  | 74 | 83 | 6  | 5  | 2.38 | 2.02 | 0.82   | 0.95   | 130 | 146 | 7.98 | 7.29 | 2 | 2 | 4  | 0  | 0 | 3 |
| ReOs | 75 | 76 | 7  | 8  | 1.9  | 2.2  | 0.06   | 1.08   | 128 | 126 | 7.88 | 8.71 | 2 | 2 | 5  | 6  | 6 | 0 |
| ReIr | 75 | 77 | 7  | 9  | 1.9  | 2.2  | 0.06   | 1.57   | 128 | 127 | 7.88 | 9.12 | 2 | 1 | 5  | 8  | 6 | 0 |
| RePt | 75 | 78 | 7  | 10 | 1.9  | 2.28 | 0.06   | 2.13   | 128 | 130 | 7.88 | 9.02 | 2 | 1 | 5  | 9  | 6 | 0 |
| ReAu | 75 | 79 | 7  | 11 | 1.9  | 2.54 | 0.06   | 2.31   | 128 | 134 | 7.88 | 9.23 | 2 | 1 | 5  | 10 | 6 | 0 |
| ReBi | 75 | 83 | 7  | 5  | 1.9  | 2.02 | 0.06   | 0.95   | 128 | 146 | 7.88 | 7.29 | 2 | 2 | 5  | 0  | 6 | 3 |
| OsIr | 76 | 77 | 8  | 9  | 2.2  | 2.2  | 1.08   | 1.57   | 126 | 127 | 8.71 | 9.12 | 2 | 1 | 6  | 8  | 0 | 0 |
| OsPt | 76 | 78 | 8  | 10 | 2.2  | 2.28 | 1.08   | 2.13   | 126 | 130 | 8.71 | 9.02 | 2 | 1 | 6  | 9  | 0 | 0 |
| OsAu | 76 | 79 | 8  | 11 | 2.2  | 2.54 | 1.08   | 2.31   | 126 | 134 | 8.71 | 9.23 | 2 | 1 | 6  | 10 | 0 | 0 |
| OsBi | 76 | 83 | 8  | 5  | 2.2  | 2.02 | 1.08   | 0.95   | 126 | 146 | 8.71 | 7.29 | 2 | 2 | 6  | 0  | 0 | 3 |
| IrPt | 77 | 78 | 9  | 10 | 2.2  | 2.28 | 1.57   | 2.13   | 127 | 130 | 9.12 | 9.02 | 1 | 1 | 8  | 9  | 0 | 0 |
| IrAu | 77 | 79 | 9  | 11 | 2.2  | 2.54 | 1.57   | 2.31   | 127 | 134 | 9.12 | 9.23 | 1 | 1 | 8  | 10 | 0 | 0 |
| IrBi | 77 | 83 | 9  | 5  | 2.2  | 2.02 | 1.57   | 0.95   | 127 | 146 | 9.12 | 7.29 | 1 | 2 | 8  | 0  | 0 | 3 |
| PtAu | 78 | 79 | 10 | 11 | 2.28 | 2.54 | 2.13   | 2.31   | 130 | 134 | 9.02 | 9.23 | 1 | 1 | 9  | 10 | 0 | 0 |
| PtBi | 78 | 83 | 10 | 5  | 2.28 | 2.02 | 2.13   | 0.95   | 130 | 146 | 9.02 | 7.29 | 1 | 2 | 9  | 0  | 0 | 3 |
| AuBi | 79 | 83 | 11 | 5  | 2.54 | 2.02 | 2.31   | 0.95   | 134 | 146 | 9.23 | 7.29 | 1 | 2 | 10 | 0  | 0 | 3 |
| AlAl | 13 | 13 | 3  | 3  | 1.61 | 1.61 | 0.44   | 0.44   | 118 | 118 | 5.99 | 5.99 | 1 | 1 | 0  | 0  | 2 | 2 |
| ScSc | 21 | 21 | 3  | 3  | 1.36 | 1.36 | 0.19   | 0.19   | 144 | 144 | 6.54 | 6.54 | 2 | 2 | 1  | 1  | 6 | 6 |
| TiTi | 22 | 22 | 4  | 4  | 1.54 | 1.54 | 0.08   | 0.08   | 132 | 132 | 6.82 | 6.82 | 2 | 2 | 2  | 2  | 0 | 0 |
| VV   | 23 | 23 | 5  | 5  | 1.63 | 1.63 | 0.53   | 0.53   | 122 | 122 | 6.74 | 6.74 | 1 | 1 | 4  | 4  | 6 | 6 |
| CrCr | 24 | 24 | 6  | 6  | 1.66 | 1.66 | 0.68   | 0.68   | 118 | 118 | 6.77 | 6.77 | 1 | 1 | 5  | 5  | 0 | 0 |
| MnMn | 25 | 25 | 7  | 7  | 1.55 | 1.55 | - 0.50 | - 0.50 | 117 | 117 | 7.44 | 7.44 | 1 | 1 | 6  | 6  | 0 | 0 |
| FeFe | 26 | 26 | 8  | 8  | 1.83 | 1.83 | 0.15   | 0.15   | 117 | 117 | 7.87 | 7.87 | 1 | 1 | 7  | 7  | 0 | 0 |
| CoCo | 27 | 27 | 9  | 9  | 1.88 | 1.88 | 0.66   | 0.66   | 116 | 116 | 7.86 | 7.86 | 1 | 1 | 8  | 8  | 0 | 0 |
| NiNi | 28 | 28 | 10 | 10 | 1.91 | 1.91 | 1.16   | 1.16   | 115 | 115 | 7.64 | 7.64 | 2 | 2 | 8  | 8  | 0 | 0 |
| CuCu | 29 | 29 | 11 | 11 | 1.9  | 1.9  | 1.24   | 1.24   | 117 | 117 | 7.73 | 7.73 | 1 | 1 | 10 | 10 | 0 | 0 |
| ZnZn | 30 | 30 | 12 | 12 | 1.65 | 1.65 | 0.09   | 0.09   | 125 | 125 | 9.40 | 9.40 | 2 | 2 | 10 | 10 | 0 | 0 |
| GaGa | 31 | 31 | 3  | 3  | 1.81 | 1.81 | 0.30   | 0.30   | 126 | 126 | 6.00 | 6.00 | 2 | 2 | 0  | 0  | 1 | 1 |
| YY   | 39 | 39 | 11 | 11 | 1.22 | 1.22 | 0.75   | 0.75   | 162 | 162 | 6.39 | 6.39 | 4 | 4 | 1  | 1  | 6 | 6 |
| ZrZr | 40 | 40 | 4  | 4  | 1.33 | 1.33 | 0.43   | 0.43   | 145 | 145 | 6.84 | 6.84 | 4 | 4 | 2  | 2  | 6 | 6 |
| NbNb | 41 | 41 | 11 | 11 | 1.6  | 1.6  | 0.92   | 0.92   | 134 | 134 | 6.89 | 6.89 | 1 | 1 | 4  | 4  | 6 | 6 |
| MoMo | 42 | 42 | 6  | 6  | 2.16 | 2.16 | 0.75   | 0.75   | 130 | 130 | 7.10 | 7.10 | 1 | 1 | 5  | 5  | 6 | 6 |
| RuRu | 44 | 44 | 8  | 8  | 2.2  | 2.2  | 1.05   | 1.05   | 125 | 125 | 7.37 | 7.37 | 1 | 1 | 7  | 7  | 0 | 0 |
| RhRh | 45 | 45 | 9  | 9  | 2.28 | 2.28 | 1.14   | 1.14   | 125 | 125 | 7.47 | 7.47 | 1 | 1 | 8  | 8  | 0 | 0 |
| PdPd | 46 | 46 | 10 | 10 | 2.2  | 2.2  | 0.56   | 0.56   | 128 | 128 | 8.35 | 8.35 | 1 | 1 | 9  | 9  | 0 | 0 |
| AgAg | 47 | 47 | 11 | 11 | 1.93 | 1.93 | 1.30   | 1.30   | 134 | 134 | 7.58 | 7.58 | 1 | 1 | 10 | 10 | 0 | 0 |
| SnSn | 50 | 50 | 4  | 4  | 1.96 | 1.96 | 1.20   | 1.20   | 140 | 140 | 7.35 | 7.35 | 2 | 2 | 0  | 0  | 2 | 2 |
| HfHf | 72 | 72 | 4  | 4  | 1.3  | 1.3  | 0.18   | 0.18   | 144 | 144 | 7.00 | 7.00 | 2 | 2 | 2  | 2  | 0 | 0 |
| TaTa | 73 | 73 | 11 | 11 | 1.5  | 1.5  | 0.32   | 0.32   | 134 | 134 | 7.89 | 7.89 | 2 | 2 | 3  | 3  | 0 | 0 |
| WW   | 74 | 74 | 6  | 6  | 2.38 | 2.38 | 0.82   | 0.82   | 130 | 130 | 7.98 | 7.98 | 2 | 2 | 4  | 4  | 0 | 0 |
| ReRe | 75 | 75 | 7  | 7  | 1.9  | 1.9  | 0.06   | 0.06   | 128 | 128 | 7.88 | 7.88 | 2 | 2 | 5  | 5  | 6 | 6 |
| OsOs | 76 | 76 | 8  | 8  | 2.2  | 2.2  | 1.08   | 1.08   | 126 | 126 | 8.71 | 8.71 | 2 | 2 | 6  | 6  | 0 | 0 |
| IrIr | 77 | 77 | 9  | 9  | 2.2  | 2.2  | 1.57   | 1.57   | 127 | 127 | 9.12 | 9.12 | 1 | 1 | 8  | 8  | 0 | 0 |
| PtPt | 78 | 78 | 10 | 10 | 2.28 | 2.28 | 2.13   | 2.13   | 130 | 130 | 9.02 | 9.02 | 1 | 1 | 9  | 9  | 0 | 0 |
| AuAu | 79 | 79 | 11 | 11 | 2.54 | 2.54 | 2.31   | 2.31   | 134 | 134 | 9.23 | 9.23 | 1 | 1 | 10 | 10 | 0 | 0 |



Table S4. Adsorption Energies ( $E_{ads}$ , eV) of Key Intermediates (\*CO<sub>2</sub>, \*COOH, \*CO, \*CHO) in Dual-Atom Catalysts (DACs) during electrocatalytic CO<sub>2</sub> reduction reaction (CO<sub>2</sub>RR).

| Metal | $E_b$ -CO | $E_b$ -CO <sub>2</sub> | $E_b$ -COOH | $E_b$ -CHO |
|-------|-----------|------------------------|-------------|------------|
| AlRh  | -1.97     | -1.59                  | -2.50       | -2.73      |
| AlPd  | -0.76     | -1.27                  | -0.99       | -1.02      |
| AlIr  | -2.48     | -1.98                  | -2.83       | -3.09      |
| AlPt  | -0.57     | -1.32                  | -1.14       | -1.26      |
| TiRh  | 0.00      | -0.37                  | -1.02       | -1.00      |
| TiPd  | -1.25     | -1.31                  | -1.94       | -2.11      |
| TiIr  | -1.16     | -2.00                  | -1.94       | -2.24      |
| TiPt  | -1.12     | -1.37                  | -1.95       | -2.26      |
| VCu   | -0.14     | -0.80                  | -1.04       | -1.20      |
| VRu   | -1.68     | -1.57                  | -1.65       | -1.88      |
| VRh   | -0.70     | -1.41                  | -1.46       | -1.83      |
| VPd   | -0.84     | -0.69                  | -0.99       | -1.36      |
| VIr   | -0.74     | -1.52                  | -1.64       | -2.03      |
| VPt   | -0.16     | -0.78                  | -1.07       | -1.24      |
| VAu   | -0.13     | -0.84                  | -1.15       | -1.25      |
| CrNi  | -0.97     | -0.67                  | -0.68       | -0.92      |
| CrRh  | -0.76     | 0.00                   | -0.49       | -1.24      |
| CrPd  | -1.12     | -0.67                  | -0.58       | -0.84      |
| CrPt  | -1.34     | -0.05                  | -0.49       | -1.07      |
| MnRh  | -1.88     | -1.01                  | -1.39       | -1.73      |
| MnPd  | -0.48     | -0.21                  | -0.05       | -0.32      |
| MnIr  | -1.92     | -0.84                  | -1.51       | -1.82      |
| FeCo  | -1.47     | -0.08                  | -0.62       | -0.96      |
| FeNi  | -1.39     | -0.33                  | -0.38       | -0.86      |
| FeCu  | -1.35     | -0.01                  | -0.32       | -1.29      |
| FeRu  | -1.94     | -0.71                  | -1.25       | -1.49      |
| FeRh  | -1.67     | -0.64                  | -0.78       | -1.12      |
| FeAg  | -1.37     | -0.10                  | -0.51       | -1.05      |
| FeIr  | -1.84     | -0.68                  | -0.24       | -1.28      |
| FePt  | -1.34     | -0.11                  | -0.33       | -1.54      |
| CoNi  | -1.56     | -0.05                  | -0.72       | -1.23      |
| CoGa  | -1.43     | -0.56                  | -0.70       | -1.02      |
| CoRh  | -2.04     | -0.42                  | -0.84       | -1.26      |
| CoPd  | -0.37     | -0.04                  | -0.07       | -0.35      |
| CoIr  | -2.25     | -0.43                  | -1.09       | -1.43      |
| CoPt  | -1.64     | -0.01                  | -0.37       | -1.22      |
| NiZn  | -1.04     | -0.26                  | -0.38       | -0.75      |
| NiGa  | -0.68     | -0.41                  | -0.16       | -0.32      |
| NiRu  | -2.23     | -0.14                  | -1.19       | -1.45      |
| NiRh  | -1.76     | -0.20                  | -0.76       | -1.40      |
| NiIr  | -2.05     | -0.14                  | -0.88       | -1.27      |

|      |       |       |       |       |
|------|-------|-------|-------|-------|
| CuRu | -2.10 | -0.33 | -1.36 | -1.64 |
| ZnRu | -1.99 | -1.25 | -1.82 | -2.08 |
| ZnRh | -1.55 | -0.82 | -0.78 | -1.01 |
| ZnIr | -2.04 | -0.96 | -1.08 | -1.31 |
| ZnPt | -1.44 | -0.37 | -1.15 | -1.32 |
| GaRu | -0.03 |       | -0.55 |       |
| GaPd | -0.53 | -0.28 | -0.11 | -0.17 |
| GaOs | -2.40 | -1.07 | -1.33 | -1.43 |
| GaPt | -0.65 | -0.35 | -0.20 | -0.12 |
| NbRh | -0.50 | -1.10 | -1.64 | -1.76 |
| NbAg | -0.84 | -0.34 | -0.79 | -0.88 |
| RuRh | -1.55 | -0.23 | -1.07 | -1.44 |
| RuPd | -2.17 | -0.71 | -1.06 | -1.49 |
| RhPd | -1.73 | -0.36 | -0.09 | -1.32 |
| RhTa | -1.44 | -1.24 | -3.31 | -2.17 |
| RhPt | -1.78 | -0.13 | -0.94 | -1.31 |
| PdTa | -1.39 | -3.03 | -3.21 | -2.13 |
| IrPt | -1.96 | -0.59 | -0.12 | -1.38 |
| CoCo | -1.90 | -0.08 | -0.69 | -1.19 |
| RhRh | -1.94 | -0.07 | -0.34 | -0.54 |
| IrIr | -1.95 | -0.04 | -0.50 | -0.95 |

**Table S5.** Calculated adsorption structure parameters of adsorption ( M-C bond length ( $d_{C-M1}$ ,  $d_{C-M2}$  in Å, M-O bond length ( $d_{O1-M1}$ ,  $d_{O2-M1}$  in Å ), M1-M2 bond length ( $d_{M1-M2}$  in Å), and Carbon dioxide activation Angle ( $\angle O1CO2$ , °)) during the adsorption of CO<sub>2</sub>.

| Metal | $d_{C-M1}$ | $d_{C-M2}$ | $d_{O1-M1}$ | $d_{O1-M2}$ | $d_{O2-M1}$ | $d_{O2-M2}$ | $d_{M1-M2}$ | $\angle O1CO2$ |
|-------|------------|------------|-------------|-------------|-------------|-------------|-------------|----------------|
| AIRh  | 2.43       | 2.05       | 1.81        | 2.86        | 3.64        | 2.86        | 2.47        | 126.88         |
| AIPd  | 2.34       | 2.06       | 1.82        | 2.95        | 3.56        | 2.73        | 2.51        | 129.69         |
| Allr  | 2.26       | 2.05       | 1.81        | 2.99        | 3.49        | 2.78        | 2.46        | 124.78         |
| AIPt  | 2.31       | 2.08       | 1.81        | 2.98        | 3.53        | 2.78        | 2.49        | 127.53         |
| TiRh  | 2.15       | 3.42       | 2.07        | 3.65        | 3.27        | 4.17        | 2.32        | 138.77         |
| TiPd  | 2.37       | 2.11       | 1.92        | 3.02        | 3.59        | 2.79        | 2.49        | 127.69         |
| TiIr  | 2.35       | 2.05       | 1.90        | 2.94        | 3.57        | 2.83        | 2.32        | 124.38         |
| TiPt  | 2.39       | 2.10       | 1.91        | 3.00        | 3.60        | 2.82        | 2.48        | 126.46         |
| VCu   | 2.04       | 2.54       | 1.89        | 3.51        | 3.23        | 3.05        | 2.46        | 130.10         |
| VRu   | 2.36       | 2.04       | 1.87        | 2.79        | 3.58        | 2.92        | 2.09        | 125.98         |
| VRh   | 2.35       | 2.03       | 1.83        | 2.90        | 3.56        | 2.84        | 2.35        | 124.36         |
| VPd   | 2.00       | 3.07       | 1.96        | 3.53        | 3.13        | 3.74        | 2.29        | 136.71         |
| VIr   | 2.34       | 2.03       | 1.84        | 2.92        | 3.55        | 2.85        | 2.35        | 123.34         |
| VPt   | 2.00       | 3.25       | 1.97        | 3.52        | 3.12        | 3.99        | 2.29        | 136.98         |
| VAu   | 1.99       | 3.02       | 1.90        | 3.84        | 3.18        | 3.58        | 2.50        | 131.44         |
| CrNi  | 2.48       | 1.95       | 1.96        | 2.78        | 3.70        | 2.62        | 2.44        | 133.45         |
| CrRh  | 1.99       | 3.53       | 2.00        | 3.57        | 3.10        | 4.33        | 2.52        | 139.50         |
| CrPd  | 2.45       | 2.08       | 1.94        | 2.92        | 3.66        | 2.75        | 2.49        | 131.79         |
| CrPt  | 1.99       | 3.39       | 1.97        | 3.40        | 3.11        | 4.21        | 2.41        | 139.00         |
| MnRh  | 2.59       | 2.03       | 1.93        | 2.73        | 3.80        | 2.86        | 2.42        | 130.64         |
| MnPd  | 2.55       | 2.18       | 2.10        | 2.95        | 3.73        | 2.77        | 2.40        | 138.87         |
| MnIr  | 2.55       | 2.04       | 1.93        | 2.78        | 3.76        | 2.87        | 2.40        | 128.72         |
| FeCo  | 2.15       | 2.05       | 2.20        | 3.13        | 3.24        | 2.17        | 2.40        | 139.06         |
| FeNi  | 2.17       | 2.07       | 1.93        | 3.03        | 3.34        | 2.53        | 2.42        | 134.17         |
| FeCu  | 2.23       | 2.92       | 2.55        | 3.95        | 3.02        | 2.68        | 2.45        | 149.72         |
| FeRu  | 2.53       | 2.06       | 1.94        | 2.79        | 3.75        | 2.89        | 2.35        | 129.00         |
| FeRh  | 2.60       | 2.07       | 1.99        | 2.76        | 3.81        | 2.87        | 2.38        | 132.89         |
| FeAg  | 2.00       | 2.91       | 2.13        | 3.85        | 3.01        | 3.03        | 2.43        | 144.23         |
| FeIr  | 2.57       | 2.08       | 1.99        | 2.79        | 3.79        | 2.87        | 2.36        | 131.71         |
| FePt  | 3.24       | 3.40       | 2.80        | 3.65        | 4.02        | 3.58        | 2.34        | 177.84         |
| CoNi  | 2.15       | 2.38       | 2.11        | 3.31        | 3.23        | 2.63        | 2.40        | 141.57         |
| CoGa  | 1.91       | 2.30       | 2.47        | 3.52        | 2.91        | 1.99        | 2.40        | 130.62         |
| CoRh  | 2.62       | 2.09       | 2.00        | 2.77        | 3.83        | 2.86        | 2.41        | 134.72         |
| CoPd  | 2.54       | 2.20       | 2.11        | 2.97        | 3.71        | 2.75        | 2.40        | 140.71         |
| CoIr  | 2.59       | 2.10       | 2.01        | 2.81        | 3.81        | 2.87        | 2.39        | 133.18         |
| CoPt  | 2.54       | 2.18       | 2.07        | 2.94        | 3.74        | 2.80        | 2.41        | 137.04         |
| NiZn  | 1.98       | 2.61       | 2.63        | 3.82        | 2.76        | 2.05        | 2.52        | 136.72         |
| NiGa  | 1.94       | 2.41       | 2.57        | 3.62        | 2.84        | 1.98        | 2.39        | 132.28         |
| NiRu  | 2.49       | 2.06       | 2.84        | 3.19        | 3.43        | 2.06        | 2.42        | 135.49         |
| NiRh  | 3.47       | 2.19       | 2.99        | 2.69        | 4.59        | 2.89        | 2.44        | 146.71         |
| Nilr  | 3.41       | 2.19       | 3.05        | 2.74        | 4.50        | 2.89        | 2.42        | 143.64         |

|      |      |      |      |      |      |      |      |        |
|------|------|------|------|------|------|------|------|--------|
| CuRu | 2.92 | 2.08 | 2.73 | 2.95 | 4.03 | 2.48 | 2.45 | 142.38 |
| ZnRu | 2.66 | 2.06 | 1.93 | 2.80 | 3.86 | 2.90 | 2.65 | 127.48 |
| ZnRh | 2.71 | 2.08 | 1.96 | 2.77 | 3.91 | 2.87 | 2.67 | 132.33 |
| ZnIr | 2.67 | 2.08 | 1.94 | 2.82 | 3.87 | 2.88 | 2.69 | 129.91 |
| ZnPt | 2.48 | 2.10 | 2.00 | 2.98 | 3.70 | 2.76 | 2.55 | 130.37 |
| GaPd | 2.41 | 2.08 | 1.96 | 2.96 | 3.63 | 2.73 | 2.46 | 130.84 |
| GaOs | 2.50 | 2.07 | 1.91 | 2.89 | 3.71 | 2.92 | 2.47 | 123.28 |
| GaPt | 2.40 | 2.09 | 1.95 | 2.98 | 3.62 | 2.78 | 2.45 | 128.37 |
| NbRh | 2.13 | 3.56 | 2.12 | 3.75 | 3.27 | 4.37 | 2.33 | 134.17 |
| NbAg | 2.13 | 4.78 | 2.11 | 4.87 | 3.26 | 5.76 | 2.78 | 134.40 |
| RuRh | 2.15 | 3.44 | 2.77 | 4.45 | 2.79 | 3.29 | 2.36 | 144.94 |
| RuPd | 2.03 | 3.55 | 3.01 | 4.70 | 2.25 | 2.86 | 2.52 | 142.13 |
| RhPd | 2.67 | 2.11 | 2.25 | 2.94 | 3.87 | 2.70 | 2.51 | 136.07 |
| RhTa | 3.65 | 2.12 | 4.56 | 3.29 | 3.72 | 2.06 | 2.35 | 130.52 |
| RhPt | 2.17 | 3.64 | 2.89 | 4.65 | 2.62 | 3.32 | 2.48 | 148.48 |
| PdTa | 2.20 | 2.18 | 2.96 | 3.33 | 3.80 | 1.75 | 2.57 | 127.82 |
| IrPt | 2.59 | 2.06 | 2.05 | 2.89 | 3.81 | 2.82 | 2.53 | 127.61 |
| CoCo | 1.99 | 2.17 | 2.18 | 3.31 | 3.06 | 2.13 | 2.44 | 137.75 |
| RhRh | 2.27 | 3.63 | 2.89 | 4.53 | 2.77 | 3.46 | 2.48 | 150.30 |
| IrIr | 2.26 | 3.58 | 2.82 | 4.54 | 2.90 | 3.44 | 2.44 | 146.77 |

Table S6. Calculated bader charge ( $Q$ , |e|) transferred from the diatomic catalyst to the adsorbed carbon dioxide molecule and the charges transferred to C, O1 and O2 atoms respectively, and the corresponding carbon dioxide activation Angle ( $\angle$  O1CO2, °).

| Metal | C_bader | O1_bader | O2_bader | CO2-bader | $\angle$ O1CO2 |
|-------|---------|----------|----------|-----------|----------------|
| AlRh  | 0.21    | 0.52     | 0.15     | 0.88      | 126.88         |
| AlPd  | 0.23    | 0.44     | 0.17     | 0.84      | 129.69         |
| AlIr  | 0.31    | 0.53     | 0.22     | 1.06      | 124.78         |
| AlPt  | 0.2     | 0.52     | 0.16     | 0.88      | 127.53         |
| TiRh  | 0.37    | 0.23     | 0.14     | 0.73      | 138.77         |
| TiPd  | 0.26    | 0.27     | 0.14     | 0.67      | 127.69         |
| TiIr  | 0.22    | 0.34     | 0.18     | 0.73      | 124.38         |
| TiPt  | 0.21    | 0.29     | 0.16     | 0.65      | 126.46         |
| VCu   | 0.42    | 0.23     | 0.2      | 0.85      | 130.1          |
| VRu   | 0.24    | 0.3      | 0.17     | 0.71      | 125.98         |
| VRh   | 0.23    | 0.29     | 0.16     | 0.67      | 124.36         |
| VPd   | 0.36    | 0.18     | 0.16     | 0.7       | 136.71         |
| VIr   | 0.23    | 0.29     | 0.17     | 0.69      | 123.34         |
| VPt   | 0.35    | 0.18     | 0.15     | 0.69      | 136.98         |
| VAu   | 0.36    | 0.26     | 0.19     | 0.81      | 131.44         |
| CrNi  | 0.25    | 0.21     | 0.12     | 0.58      | 133.45         |
| CrRh  | 0.33    | 0.17     | 0.15     | 0.65      | 139.5          |
| CrPd  | 0.23    | 0.21     | 0.13     | 0.58      | 131.79         |
| CrPt  | 0.35    | 0.14     | 0.14     | 0.63      | 139            |
| MnRh  | 0.18    | 0.26     | 0.15     | 0.59      | 130.64         |
| MnPd  | 0.18    | 0.17     | 0.12     | 0.47      | 138.87         |
| MnIr  | 0.16    | 0.28     | 0.16     | 0.61      | 128.72         |
| FeCo  | 0.33    | 0.14     | 0.15     | 0.63      | 139.06         |
| FeNi  | 0.27    | 0.2      | 0.15     | 0.62      | 134.17         |
| FeCu  | 0.21    | 0.1      | 0.12     | 0.42      | 149.72         |
| FeRu  | 0.24    | 0.24     | 0.16     | 0.64      | 129            |
| FeRh  | 0.15    | 0.25     | 0.15     | 0.56      | 132.89         |
| FeAg  | 0.26    | 0.12     | 0.14     | 0.52      | 144.23         |
| FeIr  | 0.16    | 0.24     | 0.16     | 0.56      | 131.71         |
| FePt  | 0       | 0.04     | 0.01     | 0.06      | 177.84         |
| CoNi  | 0.24    | 0.13     | 0.13     | 0.51      | 141.57         |
| CoGa  | 0.31    | 0.17     | 0.34     | 0.81      | 130.62         |
| CoRh  | 0.15    | 0.23     | 0.15     | 0.53      | 134.72         |
| CoPd  | 0.15    | 0.15     | 0.12     | 0.43      | 140.71         |
| CoIr  | 0.18    | 0.2      | 0.16     | 0.53      | 133.18         |
| CoPt  | 0.16    | 0.16     | 0.13     | 0.46      | 137.04         |
| NiZn  | 0.2     | 0.13     | 0.25     | 0.59      | 136.72         |
| NiGa  | 0.25    | 0.13     | 0.27     | 0.65      | 132.28         |
| NiRu  | 0.25    | 0.18     | 0.17     | 0.6       | 135.49         |
| NiRh  | 0.16    | 0.12     | 0.12     | 0.4       | 146.71         |
| NiIr  | 0.15    | 0.14     | 0.15     | 0.44      | 143.64         |

|      |      |      |      |      |        |
|------|------|------|------|------|--------|
| CuRu | 0.22 | 0.17 | 0.13 | 0.51 | 142.38 |
| ZnRu | 0.22 | 0.31 | 0.19 | 0.73 | 127.48 |
| ZnRh | 0.11 | 0.31 | 0.14 | 0.56 | 132.33 |
| ZnIr | 0.13 | 0.32 | 0.17 | 0.63 | 129.91 |
| ZnPt | 0.17 | 0.34 | 0.19 | 0.7  | 130.37 |
| GaPd | 0.21 | 0.29 | 0.14 | 0.63 | 130.84 |
| GaOs | 0.2  | 0.38 | 0.2  | 0.78 | 123.28 |
| GaPt | 0.18 | 0.32 | 0.16 | 0.67 | 128.37 |
| NbRh | 0.38 | 0.31 | 0.18 | 0.87 | 134.17 |
| NbAg | 0.38 | 0.26 | 0.16 | 0.81 | 134.4  |
| RuRh | 0.22 | 0.13 | 0.13 | 0.48 | 144.94 |
| RuPd | 0.23 | 0.13 | 0.17 | 0.52 | 142.13 |
| RhPd | 0.2  | 0.14 | 0.13 | 0.47 | 136.07 |
| RhTa | 0.42 | 0.2  | 0.31 | 0.93 | 130.52 |
| RhPt | 0.16 | 0.1  | 0.11 | 0.37 | 148.48 |
| PdTa | 0.39 | 0.01 | 0.72 | 1.12 | 127.82 |
| IrPt | 0.19 | 0.15 | 0.16 | 0.5  | 127.61 |
| CoCo | 0.32 | 0.14 | 0.17 | 0.64 | 137.75 |
| RhRh | 0.14 | 0.11 | 0.11 | 0.36 | 150.3  |
| IrIr | 0.15 | 0.13 | 0.12 | 0.4  | 146.77 |

Table S7. Calculated COHP between carbon dioxide adsorbed on diatomic catalyst and bimetal. There are six possible interactions between two metal atoms and three carbon dioxide atoms.

| COHP    | atom | atom | distance (Å) | ICOHP (at) E <sub>F</sub> |
|---------|------|------|--------------|---------------------------|
| 1.000   | C    | V70  | 1.995        | -3.014                    |
| 2.000   | O1   | V70  | 1.899        | -3.222                    |
| 3.000   | O2   | V70  | 3.177        | -0.227                    |
| 4.000   | C    | Au71 | 3.018        | -0.197                    |
| 5.000   | O1   | Au71 | 3.835        | -0.061                    |
| 6.000   | O2   | Au71 | 3.581        | -0.024                    |
| Average |      |      |              | -1.124                    |
| 1.000   | C    | V70  | 2.038        | -2.705                    |
| 2.000   | O1   | V70  | 1.886        | -3.394                    |
| 3.000   | O2   | V70  | 3.231        | -0.226                    |
| 4.000   | C    | Cu71 | 2.542        | -0.420                    |
| 5.000   | O1   | Cu71 | 3.514        | -0.049                    |
| 6.000   | O2   | Cu71 | 3.052        | -0.046                    |
| Average |      |      |              | -1.140                    |
| 1.000   | C    | Ru70 | 2.152        | -2.452                    |
| 2.000   | O1   | Ru70 | 2.766        | -0.130                    |
| 3.000   | O2   | Ru70 | 2.792        | -0.132                    |
| 4.000   | C    | Rh71 | 3.445        | -0.087                    |
| 5.000   | O1   | Rh71 | 4.450        | -0.029                    |
| 6.000   | O2   | Rh71 | 3.289        | -0.013                    |
| Average |      |      |              | -0.474                    |
| 1.000   | C    | Zn70 | 2.479        | -0.290                    |
| 2.000   | O1   | Zn70 | 2.005        | -0.998                    |
| 3.000   | O2   | Zn70 | 3.704        | -0.142                    |
| 4.000   | C    | Pt71 | 2.102        | -3.058                    |
| 5.000   | O1   | Pt71 | 2.975        | -0.155                    |
| 6.000   | O2   | Pt71 | 2.757        | -0.087                    |
| Average |      |      |              | -0.788                    |
| 1.000   | C    | Nb70 | 2.127        | -2.880                    |
| 2.000   | O1   | Nb70 | 2.111        | -3.369                    |
| 3.000   | O2   | Nb70 | 3.263        | -0.202                    |
| 4.000   | C    | Ag71 | 4.782        | 0.071                     |
| 5.000   | O1   | Ag71 | 4.875        | -0.094                    |
| 6.000   | O2   | Ag71 | 5.757        | 0.025                     |
| Average |      |      |              | -1.075                    |
| 1.000   | C    | Zn70 | 2.656        | -0.075                    |
| 2.000   | O1   | Zn70 | 1.927        | -1.625                    |
| 3.000   | O2   | Zn70 | 3.861        | -0.085                    |
| 4.000   | C    | Ru71 | 2.061        | -3.399                    |
| 5.000   | O1   | Ru71 | 2.804        | -0.027                    |
| 6.000   | O2   | Ru71 | 2.904        | -0.121                    |

|         |    |      |       |        |
|---------|----|------|-------|--------|
| Average |    |      |       | -0.889 |
| 1.000   | C  | V70  | 2.365 | -0.700 |
| 2.000   | O1 | V70  | 1.871 | -3.505 |
| 3.000   | O2 | V70  | 3.576 | -0.137 |
| 4.000   | C  | Ru71 | 2.045 | -3.321 |
| 5.000   | O1 | Ru71 | 2.795 | -0.115 |
| 6.000   | O2 | Ru71 | 2.922 | -0.134 |
| Average |    |      |       | -1.319 |
| 1.000   | C  | Al70 | 2.261 | -1.896 |
| 2.000   | O1 | Al70 | 1.808 | -4.232 |
| 3.000   | O2 | Al70 | 3.488 | -0.261 |
| 4.000   | C  | Ir71 | 2.050 | -3.455 |
| 5.000   | O1 | Ir71 | 2.989 | -0.183 |
| 6.000   | O2 | Ir71 | 2.777 | -0.134 |
| Average |    |      |       | -1.693 |
| 1.000   | C  | Mn70 | 2.546 | -0.398 |
| 2.000   | O1 | Mn70 | 1.929 | -2.430 |
| 3.000   | O2 | Mn70 | 3.760 | -0.123 |
| 4.000   | C  | Ir71 | 2.040 | -3.630 |
| 5.000   | O1 | Ir71 | 2.775 | -0.106 |
| 6.000   | O2 | Ir71 | 2.870 | -0.138 |
| Average |    |      |       | -1.138 |
| 1.000   | C  | Al70 | 2.308 | -1.841 |
| 2.000   | O1 | Al70 | 1.811 | -4.230 |
| 3.000   | O2 | Al70 | 3.526 | -0.266 |
| 4.000   | C  | Pt71 | 2.083 | -2.893 |
| 5.000   | O1 | Pt71 | 2.983 | -0.158 |
| 6.000   | O2 | Pt71 | 2.780 | -0.074 |
| Average |    |      |       | -1.577 |
| 1.000   | C  | Cr70 | 2.483 | -0.569 |
| 2.000   | O1 | Cr70 | 1.956 | -2.594 |
| 3.000   | O2 | Cr70 | 3.696 | -0.123 |
| 4.000   | C  | Ni71 | 1.952 | -2.256 |
| 5.000   | O1 | Ni71 | 2.782 | -0.094 |
| 6.000   | O2 | Ni71 | 2.623 | -0.105 |
| Average |    |      |       | -0.957 |
| 1.000   | C  | Al70 | 2.341 | -1.993 |
| 2.000   | O1 | Al70 | 1.819 | -4.217 |
| 3.000   | O2 | Al70 | 3.557 | -0.232 |
| 4.000   | C  | Pd71 | 2.058 | -1.905 |
| 5.000   | O1 | Pd71 | 2.946 | -0.008 |
| 6.000   | O2 | Pd71 | 2.729 | 0.012  |
| Average |    |      |       | -1.390 |
| 1.000   | C  | Mn70 | 2.592 | -0.292 |
| 2.000   | O1 | Mn70 | 1.926 | -2.386 |
| 3.000   | O2 | Mn70 | 3.802 | -0.096 |
| 4.000   | C  | Rh71 | 2.032 | -3.105 |



|         |    |      |       |        |
|---------|----|------|-------|--------|
| 5.000   | O1 | Rh71 | 2.726 | -0.055 |
| 6.000   | O2 | Rh71 | 2.865 | -0.134 |
| Average |    |      |       | -1.011 |
| 1.000   | C  | V70  | 1.995 | -2.894 |
| 2.000   | O1 | V70  | 1.963 | -2.535 |
| 3.000   | O2 | V70  | 3.131 | -0.201 |
| 4.000   | C  | Pd71 | 3.071 | -0.094 |
| 5.000   | O1 | Pd71 | 3.533 | -0.020 |
| 6.000   | O2 | Pd71 | 3.737 | -0.010 |
| Average |    |      |       | -0.959 |
| 1.000   | C  | Cr70 | 1.995 | -2.670 |
| 2.000   | O1 | Cr70 | 2.004 | -2.159 |
| 3.000   | O2 | Cr70 | 3.097 | -0.173 |
| 4.000   | C  | Rh71 | 3.530 | -0.096 |
| 5.000   | O1 | Rh71 | 3.571 | -0.013 |
| 6.000   | O2 | Rh71 | 4.328 | -0.009 |
| Average |    |      |       | -0.853 |
| 1.000   | C  | Al70 | 2.435 | -1.162 |
| 2.000   | O1 | Al70 | 1.809 | -4.568 |
| 3.000   | O2 | Al70 | 3.642 | -0.212 |
| 4.000   | C  | Rh71 | 2.052 | -2.935 |
| 5.000   | O1 | Rh71 | 2.858 | -0.046 |
| 6.000   | O2 | Rh71 | 2.858 | -0.078 |
| Average |    |      |       | -1.500 |

Table S8. Calculated the number of electrons of two metal atoms in different integration regions before and after adsorption of carbon dioxide molecules.

| Energy interval |        | (-1.40,0.15)   | (0.15,2.86)    | (-10,0) | (-10,10) |
|-----------------|--------|----------------|----------------|---------|----------|
| Zn-before       | up     | 0.106          | 0.050          | 4.844   | 4.994    |
|                 | down   | 0.108          | 0.049          | 4.847   | 4.969    |
| Ru-before       | up     | 0.191          | 2.617          | 0.859   | 4.566    |
|                 | down   | 0.119          | 2.607          | 0.743   | 4.537    |
| Zn-after        | up     | 0.190          | 0.037          | 4.842   | 4.986    |
|                 | down   | 0.190          | 0.037          | 4.842   | 4.986    |
| Ru-after        | up     | 0.162          | 2.355          | 0.972   | 4.593    |
|                 | down   | 0.162          | 2.356          | 0.974   | 4.594    |
| Zn              | before | 0.214          | 0.099          | 9.691   | 9.963    |
|                 | after  | 0.380 (+0.025) | 0.074 (-0.025) | 9.684   | 9.972    |
| Ru              | before | 0.310          | 5.224          | 1.602   | 9.103    |
|                 | after  | 0.324 (+0.025) | 4.711 (-0.025) | 1.946   | 9.187    |

Table S9. Structure types of adsorbed intermediates \*CO and \*CHO by diatomic catalysts.

| Metal     | *CO            | *CHO           | Metal | *CO            | *CHO           |
|-----------|----------------|----------------|-------|----------------|----------------|
| Allr      | end-bridge     | side-bridge II | Mnlr  | end-bridge     | side-bridge II |
| AlPd      | side-bridge II | side-bridge II | MnPd  | end-on-right   | side-bridge II |
| AlPt      | side-bridge II | side-bridge II | MnRh  | end-bridge     | side-bridge II |
| AlRh      | end-bridge     | side-bridge II | NbAg  | end-on-left    | side-on I      |
| CoCo      | end-bridge     | end-bridge     | NbRh  | side-on I      | side-on I      |
| CoGa      | end-on-left    |                | NiGa  | end-on-left    | end-on-left    |
| Colr      | end-bridge     | end-bridge     | Nilr  | end-bridge     | side-bridge II |
| CoNi      | end-bridge     | end-bridge     | NiRh  | end-bridge     | end-bridge     |
| CoPd(COO) | end-on-right   | side-bridge II | NiRu  | end-bridge     | end-on-right   |
| CoPt      | end-bridge     | end-bridge     | NiZn  | end-on-left    | end-bridge     |
| CoRh      | end-bridge     | end-bridge     | RhPd  | end-bridge     | end-bridge     |
| CrNi      | end-bridge     | side-bridge II | RhPt  | end-bridge     | end-bridge     |
| CrPd      | end-bridge     | side-bridge II | RuPd  | end-bridge     | end-on-right   |
| CrPt      | end-bridge     | end-bridge     | RuRh  | end-on-left    | end-on-right   |
| CrRh      | end-on-left    | end-bridge     | Tilr  | side-bridge II | side-bridge II |
| CuRu      | end-on-right   | t              | TiPd  | side-bridge II | side-bridge II |
| FeAg      | end-on-left    |                | TiPt  | side-bridge II | side-bridge II |
| FeCo      | end-bridge     | end-bridge     | TiRh  | side-on I      | side-on I      |
| FeIr      | end-bridge     | end-bridge     | VAu   | side-on I      | side-on I      |
| FeNi      | end-bridge     | end-bridge     | VCu   | side-on I      | side-on I      |
| FePt      | end-bridge     |                | Vlr   | side-bridge II | side-bridge II |
| FeRh      | end-bridge     | end-bridge     | VPd   | side-bridge II | side-bridge II |
| FeRu      | end-bridge     | side-bridge II | VPt   | side-on I      | side-on I      |
| GaOs      | end-bridge     |                | VRh   | side-bridge II | side-bridge II |
| GaPd      | end-on-right   | end-on-right   | VRu   | end-bridge     | side-bridge II |
| GaPt      | end-on-right   | end-on-right   | Znlr  | end-bridge     | side-bridge II |
| GaRu      | end-on-left    | end-on-left    | ZnPt  | end-on-right   | side-bridge II |
| Irlr      | end-bridge     | end-bridge     | ZnRh  | end-bridge     | side-bridge II |
| IrPt      | end-bridge     | end-bridge     | ZnRu  | end-bridge     | side-bridge II |
|           |                |                |       |                |                |

Table S10. The free energy ( $\Delta G/eV$ ) of electrocatalytic CO<sub>2</sub> reduction on TM1/TM2-N@Gra (Key intermediate: CO<sub>2</sub>-\*COOH-\*CO-\*CHO).

| metal | molecules | E <sub>0</sub> /eV | E <sub>ZPE</sub> /eV | T*S/eV | $\Delta E$ /eV | $\Delta G/eV$ |
|-------|-----------|--------------------|----------------------|--------|----------------|---------------|
| AlRh  | slab      | -632.18            |                      |        | -655.41        | 0.00          |
| AlRh  | COOH      | -660.88            | 0.65                 | 0.14   | -660.36        | -1.55         |
| AlRh  | CO        | -649.32            | 0.22                 | 0.11   | -649.21        | 0.33          |
| AlRh  | CHO       | -653.46            | 0.50                 | 0.09   | -653.05        | -0.44         |
|       | slab      | -630.93            |                      |        | -654.17        | 0.00          |
| AlPd  | COOH      | -658.13            | 0.63                 | 0.11   | -657.62        | -0.05         |
| AlPd  | CO        | -646.86            | 0.22                 | 0.07   | -646.72        | 0.08          |
| AlPd  | CHO       | -650.50            | 0.48                 | 0.06   | -650.08        | 0.03          |
|       | slab      | -633.17            |                      |        | -656.40        | 0.00          |
| AlIr  | COOH      | -662.20            | 0.64                 | 0.10   | -661.66        | -1.86         |
| AlIr  | CO        | -650.82            | 0.22                 | 0.06   | -650.66        | 0.18          |
| AlIr  | CHO       | -654.81            | 0.52                 | 0.08   | -654.37        | -0.31         |
|       | slab      | -631.92            |                      |        | -655.16        | 0.00          |
| AlPt  | COOH      | -659.26            | 0.67                 | 0.13   | -658.72        | -0.17         |
| AlPt  | CO        | -647.66            | 0.21                 | 0.07   | -647.52        | 0.38          |
| AlPt  | CHO       | -651.74            | 0.52                 | 0.07   | -651.29        | -0.36         |
|       | slab      | -636.50            |                      |        | -659.74        | 0.00          |
| TiRh  | COOH      | -663.73            | 0.62                 | 0.13   | -663.23        | -0.09         |
| TiRh  | CO        | -651.67            | 0.17                 | 0.10   | -651.61        | 0.80          |
| TiRh  | CHO       | -656.05            | 0.48                 | 0.13   | -655.70        | -0.69         |
|       | slab      | -634.19            |                      |        | -657.43        | 0.00          |
| TiPd  | COOH      | -662.34            | 0.65                 | 0.13   | -661.82        | -0.99         |
| TiPd  | CO        | -650.61            | 0.21                 | 0.08   | -650.48        | 0.52          |
| TiPd  | CHO       | -654.85            | 0.50                 | 0.08   | -654.43        | -0.56         |
|       | slab      | -637.62            |                      |        | -660.85        | 0.00          |
| TiIr  | COOH      | -665.76            | 0.64                 | 0.11   | -665.23        | -0.98         |
| TiIr  | CO        | -653.95            | 0.19                 | 0.09   | -653.85        | 0.56          |
| TiIr  | CHO       | -658.41            | 0.50                 | 0.10   | -658.01        | -0.77         |
|       | slab      | -635.23            |                      |        | -658.47        | 0.00          |
| TiPt  | COOH      | -663.38            | 0.65                 | 0.13   | -662.86        | -0.99         |
| TiPt  | CO        | -651.52            | 0.22                 | 0.09   | -651.39        | 0.65          |
| TiPt  | CHO       | -656.04            | 0.50                 | 0.05   | -655.58        | -0.79         |
|       | slab      | -633.52            |                      |        | -656.76        | 0.00          |
| VCu   | COOH      | -660.77            | 0.64                 | 0.15   | -660.28        | -0.12         |
| VCu   | CO        | -648.83            | 0.18                 | 0.12   | -648.77        | 0.69          |
| VCu   | CHO       | -653.27            | 0.47                 | 0.15   | -652.95        | -0.78         |
|       | slab      | -638.27            |                      |        | -661.50        | 0.00          |
| VRu   | COOH      | -666.12            | 0.64                 | 0.10   | -665.59        | -0.68         |
| VRu   | CO        | -655.12            | 0.23                 | 0.09   | -654.98        | -0.21         |
| VRu   | CHO       | -658.70            | 0.48                 | 0.12   | -658.34        | 0.04          |
|       | slab      | -636.67            |                      |        | -659.90        | 0.00          |
| VRh   | COOH      | -664.33            | 0.65                 | 0.14   | -663.81        | -0.51         |

|      |      |         |      |      |         |       |
|------|------|---------|------|------|---------|-------|
| VRh  | CO   | -652.54 | 0.21 | 0.07 | -652.41 | 0.59  |
| VRh  | CHO  | -657.05 | 0.50 | 0.09 | -656.63 | -0.83 |
|      | slab | -634.50 |      |      | -657.73 | 0.00  |
| VPd  | COOH | -661.69 | 0.64 | 0.15 | -661.21 | -0.08 |
| VPd  | CO   | -650.51 | 0.20 | 0.11 | -650.42 | -0.03 |
| VPd  | CHO  | -654.41 | 0.49 | 0.10 | -654.02 | -0.20 |
|      | slab | -637.81 |      |      | -661.05 | 0.00  |
| Vlr  | COOH | -665.66 | 0.67 | 0.11 | -665.10 | -0.65 |
| Vlr  | CO   | -653.73 | 0.19 | 0.09 | -653.63 | 0.66  |
| Vlr  | CHO  | -658.39 | 0.51 | 0.08 | -657.97 | -0.94 |
|      | slab | -635.50 |      |      | -658.73 | 0.00  |
| VPt  | COOH | -662.77 | 0.64 | 0.15 | -662.27 | -0.14 |
| VPt  | CO   | -650.83 | 0.17 | 0.10 | -650.76 | 0.69  |
| VPt  | CHO  | -655.29 | 0.47 | 0.13 | -654.94 | -0.78 |
|      | slab | -631.74 |      |      | -654.98 | 0.00  |
| VAu  | COOH | -659.09 | 0.62 | 0.18 | -658.65 | -0.27 |
| VAu  | CO   | -647.04 | 0.16 | 0.11 | -647.00 | 0.83  |
| VAu  | CHO  | -651.55 | 0.47 | 0.13 | -651.21 | -0.81 |
|      | slab | -636.26 |      |      | -659.50 | 0.00  |
| CrNi | COOH | -663.14 | 0.64 | 0.11 | -662.61 | 0.29  |
| CrNi | CO   | -652.40 | 0.22 | 0.10 | -652.28 | -0.49 |
| CrNi | CHO  | -655.73 | 0.50 | 0.12 | -655.35 | 0.33  |
|      | slab | -636.98 |      |      | -660.22 | 0.00  |
| CrRh | COOH | -663.67 | 0.61 | 0.10 | -663.17 | 0.45  |
| CrRh | CO   | -652.91 | 0.22 | 0.10 | -652.80 | -0.45 |
| CrRh | CHO  | -656.77 | 0.49 | 0.10 | -656.38 | -0.18 |
|      | slab | -635.12 |      |      | -658.35 | 0.00  |
| CrPd | COOH | -661.90 | 0.64 | 0.18 | -661.44 | 0.31  |
| CrPd | CO   | -651.41 | 0.21 | 0.12 | -651.32 | -0.69 |
| CrPd | CHO  | -654.51 | 0.49 | 0.10 | -654.13 | 0.59  |
|      | slab | -636.07 |      |      | -659.30 | 0.00  |
| CrPt | COOH | -662.76 | 0.62 | 0.13 | -662.26 | 0.44  |
| CrPt | CO   | -652.58 | 0.22 | 0.09 | -652.45 | -1.01 |
| CrPt | CHO  | -655.68 | 0.48 | 0.08 | -655.28 | 0.58  |
|      | slab | -636.54 |      |      | -659.78 | 0.00  |
| MnRh | COOH | -664.14 | 0.64 | 0.16 | -663.65 | -0.47 |
| MnRh | CO   | -653.59 | 0.22 | 0.09 | -653.46 | -0.63 |
| MnRh | CHO  | -656.82 | 0.50 | 0.10 | -656.42 | 0.43  |
|      | slab | -635.02 |      |      | -658.25 | 0.00  |
| MnPd | COOH | -661.27 | 0.62 | 0.12 | -660.77 | 0.88  |
| MnPd | CO   | -650.66 | 0.21 | 0.12 | -650.57 | -0.62 |
| MnPd | CHO  | -653.89 | 0.48 | 0.11 | -653.52 | 0.46  |
|      | slab | -637.80 |      |      | -661.04 | 0.00  |
| Mnlr | COOH | -665.52 | 0.66 | 0.14 | -665.00 | -0.56 |
| Mnlr | CO   | -654.89 | 0.21 | 0.13 | -654.82 | -0.63 |
| Mnlr | CHO  | -658.18 | 0.52 | 0.10 | -657.76 | 0.45  |
|      | slab | -636.09 |      |      | -659.32 | 0.00  |
| FeCo | COOH | -662.92 | 0.65 | 0.10 | -662.36 | 0.36  |

|      |      |         |      |      |         |       |
|------|------|---------|------|------|---------|-------|
| FeCo | CO   | -652.73 | 0.11 | 0.04 | -652.67 | -1.12 |
| FeCo | CHO  | -655.60 | 0.48 | 0.11 | -655.23 | 0.84  |
|      | slab | -634.75 |      |      | -657.98 | 0.00  |
| FeNi | COOH | -661.33 | 0.63 | 0.17 | -660.87 | 0.51  |
| FeNi | CO   | -651.31 | 0.11 | 0.05 | -651.25 | -1.19 |
| FeNi | CHO  | -654.16 | 0.48 | 0.11 | -653.78 | 0.86  |
|      | slab | -632.59 |      |      | -655.83 | 0.00  |
| FeCu | COOH | -659.12 | 0.63 | 0.16 | -658.65 | 0.58  |
| FeCu | CO   | -649.11 | 0.23 | 0.10 | -648.99 | -1.16 |
| FeCu | CHO  | -652.43 | 0.22 | 0.13 | -652.33 | 0.05  |
|      | slab | -636.84 |      |      | -660.07 | 0.00  |
| FeRu | COOH | -664.29 | 0.65 | 0.14 | -663.78 | -0.31 |
| FeRu | CO   | -653.95 | 0.23 | 0.04 | -653.77 | -0.81 |
| FeRu | CHO  | -656.87 | 0.51 | 0.09 | -656.45 | 0.72  |
|      | slab | -635.64 |      |      | -658.87 | 0.00  |
| FeRh | COOH | -662.62 | 0.65 | 0.15 | -662.13 | 0.14  |
| FeRh | CO   | -652.48 | 0.23 | 0.09 | -652.35 | -1.04 |
| FeRh | CHO  | -655.31 | 0.50 | 0.09 | -654.90 | 0.85  |
|      | slab | -630.23 |      |      | -653.47 | 0.00  |
| FeAg | COOH | -656.94 | 0.64 | 0.14 | -656.44 | 0.42  |
| FeAg | CO   | -646.77 | 0.24 | 0.09 | -646.63 | -1.00 |
| FeAg | CHO  | -649.97 | 0.23 | 0.10 | -649.84 | 0.19  |
|      | slab | -636.77 |      |      | -660.01 | 0.00  |
| FeIr | COOH | -663.21 | 0.68 | 0.13 | -662.67 | 0.74  |
| FeIr | CO   | -653.79 | 0.23 | 0.08 | -653.65 | -1.80 |
| FeIr | CHO  | -656.61 | 0.49 | 0.11 | -656.22 | 0.82  |
|      | slab | -634.66 |      |      | -657.90 | 0.00  |
| FePt | COOH | -661.20 | 0.65 | 0.14 | -660.68 | 0.62  |
| FePt | CO   | -651.18 | 0.23 | 0.09 | -651.04 | -1.17 |
| FePt | CHO  | -654.76 | 0.24 | 0.09 | -654.61 | -0.17 |
|      | slab | -633.56 |      |      | -656.80 | 0.00  |
| CoNi | COOH | -660.49 | 0.65 | 0.13 | -659.97 | 0.23  |
| CoNi | CO   | -650.29 | 0.10 | 0.05 | -650.24 | -1.09 |
| CoNi | CHO  | -653.34 | 0.48 | 0.13 | -652.99 | 0.65  |
|      | slab | -630.83 |      |      | -654.07 | 0.00  |
| CoGa | COOH | -657.74 | 0.59 | 0.16 | -657.30 | 0.17  |
| CoGa | CO   | -647.43 | 0.21 | 0.14 | -647.36 | -0.87 |
| CoGa | CHO  | -650.41 | 0.40 | 0.10 | -650.11 | 0.65  |
|      | slab | -634.30 |      |      | -657.54 | 0.00  |
| CoRh | COOH | -661.35 | 0.62 | 0.13 | -660.86 | 0.08  |
| CoRh | CO   | -651.52 | 0.23 | 0.09 | -651.38 | -1.34 |
| CoRh | CHO  | -654.11 | 0.49 | 0.11 | -653.74 | 1.04  |
|      | slab | -632.46 |      |      | -655.69 | 0.00  |
| CoPd | COOH | -658.73 | 0.64 | 0.17 | -658.26 | 0.83  |
| CoPd | CO   | -648.00 | 0.20 | 0.12 | -647.92 | -0.48 |
| CoPd | CHO  | -651.36 | 0.49 | 0.11 | -650.99 | 0.34  |
|      | slab | -635.40 |      |      | -658.63 | 0.00  |
| CoIr | COOH | -662.69 | 0.65 | 0.15 | -662.18 | -0.15 |

|             |      |         |      |      |         |       |
|-------------|------|---------|------|------|---------|-------|
| Colr        | CO   | -652.82 | 0.21 | 0.12 | -652.73 | -1.37 |
| Colr        | CHO  | -655.37 | 0.49 | 0.11 | -654.99 | 1.14  |
|             | slab | -633.46 |      |      | -656.70 | 0.00  |
| CoPt        | COOH | -660.03 | 0.66 | 0.13 | -659.50 | 0.60  |
| CoPt        | CO   | -650.27 | 0.23 | 0.10 | -650.15 | -1.46 |
| CoPt        | CHO  | -653.23 | 0.49 | 0.13 | -652.87 | 0.68  |
|             | slab | -628.13 |      |      | -651.37 | 0.00  |
| NiZn        | COOH | -654.71 | 0.63 | 0.16 | -654.24 | 0.52  |
| NiZn        | CO   | -644.34 | 0.21 | 0.13 | -644.26 | -0.84 |
| NiZn        | CHO  | -647.43 | 0.48 | 0.11 | -647.06 | 0.60  |
|             | slab | -629.89 |      |      | -653.13 | 0.00  |
| NiGa        | COOH | -656.25 | 0.57 | 0.21 | -655.90 | 0.63  |
| NiGa        | CO   | -645.74 | 0.22 | 0.10 | -645.63 | -0.55 |
| NiGa        | CHO  | -648.77 | 0.49 | 0.11 | -648.39 | 0.64  |
|             | slab | -634.08 |      |      | -657.32 | 0.00  |
| NiRu        | COOH | -661.48 | 0.61 | 0.16 | -661.02 | -0.30 |
| NiRu        | CO   | -651.48 | 0.23 | 0.10 | -651.35 | -1.15 |
| NiRu        | CHO  | -654.08 | 0.48 | 0.13 | -653.73 | 1.02  |
|             | slab | -633.05 |      |      | -656.29 | 0.00  |
| NiRh        | COOH | -660.01 | 0.63 | 0.14 | -659.52 | 0.16  |
| NiRh        | CO   | -649.98 | 0.22 | 0.11 | -649.87 | -1.16 |
| NiRh        | CHO  | -653.00 | 0.49 | 0.11 | -652.62 | 0.65  |
|             | slab | -634.18 |      |      | -657.41 | 0.00  |
| NiIr        | COOH | -661.26 | 0.64 | 0.17 | -660.79 | 0.03  |
| NiIr        | CO   | -651.40 | 0.24 | 0.09 | -651.25 | -1.28 |
| NiIr        | CHO  | -654.00 | 0.46 | 0.11 | -653.64 | 1.01  |
|             | slab | -631.98 |      |      | -655.22 | 0.00  |
| <i>CuRu</i> | COOH | -659.54 | 0.63 | 0.14 | -659.04 | -0.43 |
| <i>CuRu</i> | CO   | -649.25 | 0.22 | 0.10 | -649.13 | -0.91 |
| <i>CuRu</i> | CHO  | -652.71 | 0.45 | 0.10 | -652.35 | 0.18  |
|             | slab | -629.93 |      |      | -653.16 | 0.00  |
| ZnRu        | COOH | -657.95 | 0.65 | 0.14 | -657.44 | -0.88 |
| ZnRu        | CO   | -647.09 | 0.23 | 0.09 | -646.96 | -0.33 |
| ZnRu        | CHO  | -650.56 | 0.50 | 0.09 | -650.15 | 0.20  |
|             | slab | -629.01 |      |      | -652.24 | 0.00  |
| ZnRh        | COOH | -655.99 | 0.64 | 0.14 | -655.49 | 0.16  |
| ZnRh        | CO   | -645.73 | 0.24 | 0.08 | -645.57 | -0.91 |
| ZnRh        | CHO  | -648.56 | 0.48 | 0.11 | -648.19 | 0.78  |
|             | slab | -629.91 |      |      | -653.15 | 0.00  |
| ZnIr        | COOH | -657.19 | 0.63 | 0.17 | -656.72 | -0.18 |
| ZnIr        | CO   | -647.12 | 0.24 | 0.08 | -646.95 | -1.05 |
| ZnIr        | CHO  | -649.77 | 0.48 | 0.13 | -649.41 | 0.94  |
|             | slab | -627.68 |      |      | -650.91 | 0.00  |
| ZnPt        | COOH | -655.04 | 0.65 | 0.13 | -654.51 | -0.20 |
| ZnPt        | CO   | -644.29 | 0.23 | 0.09 | -644.15 | -0.45 |
| ZnPt        | CHO  | -647.55 | 0.50 | 0.10 | -647.14 | 0.41  |
|             | slab | -631.73 |      |      | -654.97 | 0.00  |
| GaRu        | COOH | -658.48 | 0.64 | 0.17 | -658.01 | 0.35  |

|             |      |         |      |      |         |       |
|-------------|------|---------|------|------|---------|-------|
| GaRu        | CO   | -646.87 | 0.19 | 0.13 | -646.81 | 0.38  |
| GaRu        | CHO  | -646.89 | 0.19 | 0.15 | -646.85 | 3.37  |
|             | slab | -629.05 |      |      | -652.28 | 0.00  |
| GaPd        | COOH | -655.36 | 0.63 | 0.15 | -654.88 | 0.80  |
| GaPd        | CO   | -644.75 | 0.21 | 0.11 | -644.66 | -0.59 |
| GaPd        | CHO  | -647.77 | 0.47 | 0.09 | -647.39 | 0.67  |
|             | slab | -632.97 |      |      | -656.20 | 0.00  |
| <i>GaOs</i> | COOH | -660.50 | 0.63 | 0.17 | -660.04 | -0.44 |
| <i>GaOs</i> | CO   | -650.53 | 0.24 | 0.08 | -650.38 | -1.16 |
| <i>GaOs</i> | CHO  | -654.06 | 0.46 | 0.10 | -653.69 | 0.08  |
|             | slab | -629.98 |      |      | -653.21 | 0.00  |
| GaPt        | COOH | -656.38 | 0.66 | 0.14 | -655.86 | 0.75  |
| GaPt        | CO   | -645.80 | 0.23 | 0.11 | -645.68 | -0.64 |
| GaPt        | CHO  | -648.64 | 0.49 | 0.12 | -648.27 | 0.81  |
|             | slab | -637.14 |      |      | -660.38 | 0.00  |
| NbRh        | COOH | -664.98 | 0.62 | 0.20 | -664.56 | -0.78 |
| NbRh        | CO   | -652.81 | 0.15 | 0.14 | -652.80 | 0.94  |
| NbRh        | CHO  | -657.45 | 0.47 | 0.16 | -657.14 | -0.94 |
|             | slab | -632.43 |      |      | -655.66 | 0.00  |
| <i>NbAg</i> | COOH | -659.42 | 0.65 | 0.15 | -658.92 | 0.15  |
| <i>NbAg</i> | CO   | -648.44 | 0.21 | 0.11 | -648.35 | -0.25 |
| <i>NbAg</i> | CHO  | -651.86 | 0.46 | 0.11 | -651.50 | 0.25  |
|             | slab | -635.11 |      |      | -658.35 | 0.00  |
| RuRh        | COOH | -662.39 | 0.63 | 0.12 | -661.88 | -0.14 |
| RuRh        | CO   | -651.83 | 0.22 | 0.12 | -651.74 | -0.67 |
| RuRh        | CHO  | -655.11 | 0.48 | 0.12 | -654.75 | 0.39  |
|             | slab | -632.99 |      |      | -656.23 | 0.00  |
| <i>RuPd</i> | COOH | -660.26 | 0.63 | 0.12 | -659.75 | -0.12 |
| <i>RuPd</i> | CO   | -650.33 | 0.23 | 0.11 | -650.20 | -1.28 |
| <i>RuPd</i> | CHO  | -653.83 | 0.24 | 0.08 | -653.67 | -0.07 |
|             | slab | -631.88 |      |      | -655.11 | 0.00  |
| RhPd        | COOH | -657.99 | 0.63 | 0.17 | -657.52 | 0.99  |
| RhPd        | CO   | -648.78 | 0.22 | 0.11 | -648.67 | -1.96 |
| RhPd        | CHO  | -651.75 | 0.49 | 0.11 | -651.38 | 0.69  |
|             | slab | -640.35 |      |      | -663.59 | 0.00  |
| RhTa        | COOH | -668.23 | 0.58 | 0.17 | -667.82 | -0.83 |
| RhTa        | CO   | -655.32 | 0.21 | 0.10 | -655.21 | 1.79  |
| RhTa        | CHO  | -659.44 | 0.39 | 0.12 | -659.17 | -0.56 |
|             | slab | -632.88 |      |      | -656.12 | 0.00  |
| RhPt        | COOH | -660.03 | 0.63 | 0.17 | -659.57 | -0.06 |
| RhPt        | CO   | -649.83 | 0.24 | 0.08 | -649.67 | -0.92 |
| RhPt        | CHO  | -652.75 | 0.48 | 0.08 | -652.35 | 0.72  |
|             | slab | -636.29 |      |      | -659.52 | 0.00  |
| PdTa        | COOH | -665.70 | 0.58 | 0.17 | -665.28 | -2.36 |
| PdTa        | CO   | -652.84 | 0.21 | 0.11 | -652.74 | 1.72  |
| PdTa        | CHO  | -656.97 | 0.39 | 0.12 | -656.71 | -0.57 |
|             | slab | -634.02 |      |      | -657.25 | 0.00  |
| IrPt        | COOH | -660.09 | 0.65 | 0.15 | -659.59 | 1.06  |

|      |      |         |      |      |         |       |
|------|------|---------|------|------|---------|-------|
| IrPt | CO   | -651.14 | 0.23 | 0.09 | -651.00 | -2.23 |
| IrPt | CHO  | -653.95 | 0.49 | 0.11 | -653.56 | 0.84  |
|      | slab | -634.71 |      |      | -657.95 | 0.00  |
| CoCo | COOH | -661.61 | 0.62 | 0.19 | -661.18 | 0.17  |
| CoCo | CO   | -651.79 | 0.10 | 0.05 | -651.74 | -1.38 |
| CoCo | CHO  | -654.45 | 0.47 | 0.14 | -654.11 | 1.02  |
|      | slab | -634.02 |      |      | -657.26 | 0.00  |
| RhRh | COOH | -660.56 | 0.65 | 0.16 | -660.08 | 0.58  |
| RhRh | CO   | -651.13 | 0.23 | 0.08 | -650.98 | -1.72 |
| RhRh | CHO  | -653.11 | 0.50 | 0.09 | -652.71 | 1.67  |
|      | slab | -636.38 |      |      | -659.62 | 0.00  |
| Irlr | COOH | -663.08 | 0.65 | 0.16 | -662.59 | 0.42  |
| Irlr | CO   | -653.51 | 0.24 | 0.07 | -653.34 | -1.56 |
| Irlr | CHO  | -655.88 | 0.48 | 0.09 | -655.49 | 1.25  |

Table S11. The free energy ( $\Delta G/eV$ ) of electrocatalytic CO<sub>2</sub> reduction on TM1/TM2-N@Gra to generate CH<sub>4</sub> (Path1: CO<sub>2</sub>-\*COOH-\*CO-\*CHO-\*CH<sub>2</sub>O-\*CH<sub>3</sub>O-\*O+CH<sub>4</sub>-\*OH-\*H<sub>2</sub>O).

| metal | molecules | E0      | E_ZPE   | T*S  | $\Delta E /eV$ | $\Delta G/eV$ |
|-------|-----------|---------|---------|------|----------------|---------------|
|       | slab      | -632.18 | -632.17 |      | -655.41        | 0.00          |
| AIRh  | COOH      | -660.88 | 0.65    | 0.14 | -660.36        | -1.55         |
| AIRh  | CO        | -649.32 | 0.22    | 0.11 | -649.21        | 0.33          |
| AIRh  | CHO       | -653.46 | 0.50    | 0.09 | -653.05        | -0.44         |
| AIRh  | CH2O      | -656.81 | 0.79    | 0.12 | -656.14        | 0.31          |
| AIRh  | CH3O      | -661.09 | 1.11    | 0.20 | -660.17        | -0.63         |
| AIRh  | O         | -640.54 | 0.09    | 0.03 | -640.48        | -0.95         |
| AIRh  | OH        | -644.98 | 0.39    | 0.06 | -644.65        | -0.77         |
| AIRh  | H2O       |         | -14.25  |      | -646.43        | 1.63          |
|       |           |         |         |      |                |               |
|       | slab      | -631.92 |         |      | -655.16        | 0.00          |
| AIPt  | COOH      | -659.26 | 0.67    | 0.13 | -658.72        | -0.17         |
| AIPt  | CO        | -647.66 | 0.21    | 0.08 | -647.52        | 0.38          |
| AIPt  | CHO       | -651.74 | 0.52    | 0.07 | -651.29        | -0.36         |
| AIPt  | CH2O      | -656.15 | 0.81    | 0.07 | -655.41        | -0.73         |
| AIPt  | CH3O      | -659.72 | 1.08    | 0.07 | -658.72        | 0.10          |
| AIPt  | O         | -639.44 | 0.09    | 0.03 | -639.38        | -1.30         |
| AIPt  | OH        | -643.31 | 0.39    | 0.05 | -642.97        | -0.19         |
| AIPt  | H2O       |         | -14.25  |      | -646.17        | 0.20          |
|       |           |         |         |      |                |               |
|       | slab      | -630.93 |         |      | -654.17        | 0.00          |
| AIPd  | COOH      | -658.13 | 0.63    | 0.11 | -657.62        | -0.05         |
| AIPd  | CO        | -646.86 | 0.22    | 0.07 | -646.72        | 0.08          |
| AIPd  | CHO       | -650.50 | 0.48    | 0.06 | -650.08        | 0.03          |
| AIPd  | CH2O      | -655.10 | 0.81    | 0.10 | -654.39        | -0.90         |
| AIPd  | CH3O      | -658.97 | 1.11    | 0.19 | -658.05        | -0.26         |
| AIPd  | O         | -638.48 | 0.09    | 0.03 | -638.42        | -1.01         |
| AIPd  | OH        | -642.93 | 0.36    | 0.08 | -642.65        | -0.83         |



|      |      |         |        |      |         |       |
|------|------|---------|--------|------|---------|-------|
| AIPd | H2O  |         | -14.25 |      | -645.18 | 0.87  |
|      |      |         |        |      |         |       |
|      | slab | -638.27 |        |      | -661.50 | 0.00  |
| VRu  | COOH | -666.12 | 0.64   | 0.10 | -665.59 | -0.68 |
| VRu  | CO   | -655.12 | 0.23   | 0.09 | -654.98 | -0.21 |
| VRu  | CHO  | -658.70 | 0.48   | 0.12 | -658.34 | 0.04  |
| VRu  | CH2O | -663.01 | 0.80   | 0.13 | -662.33 | -0.59 |
| VRu  | CH3O | -666.48 | 1.11   | 0.12 | -665.49 | 0.24  |
| VRu  | O    | -646.46 | 0.08   | 0.06 | -646.44 | -1.59 |
| VRu  | OH   | -650.26 | 0.35   | 0.11 | -650.02 | -0.18 |
| VRu  | H2O  |         | -14.25 |      | -652.52 | 0.90  |
|      |      |         |        |      |         |       |
|      | slab | -634.50 |        |      | -657.73 | 0.00  |
| VPd  | COOH | -661.69 | 0.64   | 0.15 | -661.21 | -0.08 |
| VPd  | CO   | -650.51 | 0.20   | 0.11 | -650.42 | -0.03 |
| VPd  | CHO  | -654.41 | 0.49   | 0.10 | -654.02 | -0.20 |
| VPd  | CH2O | -659.04 | 0.82   | 0.11 | -658.34 | -0.92 |
| VPd  | CH3O | -663.26 | 1.11   | 0.13 | -662.28 | -0.54 |
| VPd  | O    | -643.57 | 0.09   | 0.04 | -643.52 | -1.88 |
| VPd  | OH   | -647.07 | 0.34   | 0.09 | -646.82 | 0.10  |
| VPd  | H2O  |         | -14.25 |      | -648.75 | 1.48  |
|      |      |         |        |      |         |       |
|      | slab | -636.26 |        |      | -659.50 | 0.00  |
| CrNi | COOH | -663.14 | 0.64   | 0.11 | -662.61 | 0.29  |
| CrNi | CO   | -652.40 | 0.22   | 0.10 | -652.28 | -0.49 |
| CrNi | CHO  | -655.73 | 0.50   | 0.12 | -655.35 | 0.33  |
| CrNi | CH2O | -659.96 | 0.81   | 0.12 | -659.27 | -0.52 |
| CrNi | CH3O | -663.95 | 1.09   | 0.22 | -663.08 | -0.41 |
| CrNi | O    | -644.12 | 0.08   | 0.05 | -644.09 | -1.65 |
| CrNi | OH   | -647.78 | 0.36   | 0.08 | -647.50 | -0.01 |
| CrNi | H2O  |         | -14.25 |      | -650.51 | 0.39  |
|      |      |         |        |      |         |       |
|      | slab | -636.98 |        |      | -660.22 | 0.00  |
| CrRh | COOH | -663.67 | 0.61   | 0.10 | -663.17 | 0.45  |
| CrRh | CO   | -652.91 | 0.22   | 0.10 | -652.80 | -0.45 |
| CrRh | CHO  | -656.77 | 0.49   | 0.10 | -656.38 | -0.18 |
| CrRh | CH2O | -661.04 | 0.80   | 0.11 | -660.35 | -0.57 |
| CrRh | CH3O | -664.62 | 1.08   | 0.11 | -663.65 | 0.09  |
| CrRh | O    | -644.69 | 0.08   | 0.06 | -644.66 | -1.65 |
| CrRh | OH   | -648.48 | 0.35   | 0.08 | -648.21 | -0.14 |
| CrRh | H2O  |         | -14.25 |      | -651.23 | 0.38  |
|      |      |         |        |      |         |       |
|      | slab | -636.54 |        |      | -659.78 | 0.00  |
| MnRh | COOH | -664.14 | 0.64   | 0.16 | -663.65 | -0.47 |
| MnRh | CO   | -653.60 | 0.22   | 0.09 | -653.46 | -0.63 |
| MnRh | CHO  | -656.82 | 0.50   | 0.10 | -656.43 | 0.43  |
| MnRh | CH2O | -660.58 | 0.80   | 0.12 | -659.90 | -0.07 |

|      |      |         |        |      |         |       |
|------|------|---------|--------|------|---------|-------|
| MnRh | CH3O | -663.93 | 1.09   | 0.20 | -663.04 | 0.26  |
| MnRh | O    | -643.42 | 0.08   | 0.05 | -643.39 | -0.99 |
| MnRh | OH   | -647.39 | 0.28   | 0.01 | -647.13 | -0.34 |
| MnRh | H2O  |         | -14.25 |      | -650.79 | -0.27 |
|      |      |         |        |      |         |       |
|      | slab | -637.80 |        |      | -661.04 | 0.00  |
| MnIr | COOH | -665.52 | 0.66   | 0.14 | -665.00 | -0.56 |
| MnIr | CO   | -654.89 | 0.21   | 0.13 | -654.82 | -0.63 |
| MnIr | CHO  | -658.18 | 0.52   | 0.10 | -657.76 | 0.45  |
| MnIr | CH2O | -661.65 | 0.82   | 0.07 | -660.91 | 0.26  |
| MnIr | CH3O | -664.98 | 1.09   | 0.20 | -664.08 | 0.22  |
| MnIr | O    | -644.48 | 0.07   | 0.06 | -644.46 | -1.02 |
| MnIr | OH   | -648.82 | 0.35   | 0.08 | -648.55 | -0.68 |
| MnIr | H2O  |         | -14.25 |      | -652.05 | -0.11 |
|      |      |         |        |      |         |       |
|      | slab | -629.93 |        |      | -653.16 | 0.00  |
| ZnRu | COOH | -657.95 | 0.65   | 0.14 | -657.44 | -0.88 |
| ZnRu | CO   | -647.09 | 0.23   | 0.09 | -646.96 | -0.33 |
| ZnRu | CHO  | -650.56 | 0.50   | 0.09 | -650.15 | 0.21  |
| ZnRu | CH2O | -654.00 | 0.81   | 0.10 | -653.29 | 0.26  |
| ZnRu | CH3O | -657.08 | 1.07   | 0.18 | -656.18 | 0.51  |
| ZnRu | O    | -637.22 | 0.08   | 0.04 | -637.18 | -1.63 |
| ZnRu | OH   | -641.39 | 0.39   | 0.05 | -641.05 | -0.47 |
| ZnRu | H2O  |         | -14.25 |      | -644.18 | 0.27  |
|      |      |         |        |      |         |       |
|      | slab | -627.68 |        |      | -650.91 | 0.00  |
| ZnPt | COOH | -655.04 | 0.65   | 0.13 | -654.51 | -0.20 |
| ZnPt | CO   | -644.29 | 0.23   | 0.09 | -644.15 | -0.45 |
| ZnPt | CHO  | -647.55 | 0.50   | 0.10 | -647.14 | 0.41  |
| ZnPt | CH2O | -650.67 | 0.79   | 0.13 | -650.02 | 0.52  |
| ZnPt | CH3O | -654.89 | 1.10   | 0.19 | -653.98 | -0.56 |
| ZnPt | O    | -634.20 | 0.08   | 0.04 | -634.16 | -0.82 |
| ZnPt | OH   | -639.03 | 0.39   | 0.05 | -638.69 | -1.13 |
| ZnPt | H2O  |         | -14.25 |      | -641.93 | 0.16  |
|      |      |         |        |      |         |       |
|      | slab | -632.43 |        |      | -655.66 | 0.00  |
| NbAg | COOH | -659.42 | 0.65   | 0.15 | -658.92 | 0.15  |
| NbAg | CO   | -648.44 | 0.21   | 0.11 | -648.35 | -0.25 |
| NbAg | CHO  | -651.86 | 0.46   | 0.11 | -651.50 | 0.25  |
| NbAg | CH2O | -656.73 | 0.79   | 0.13 | -656.07 | -1.17 |
| NbAg | CH3O | -660.80 | 1.11   | 0.09 | -659.78 | -0.31 |
| NbAg | O    | -641.67 | 0.08   | 0.05 | -641.64 | -2.50 |
| NbAg | OH   | -644.56 | 0.33   | 0.11 | -644.34 | 0.70  |
| NbAg | H2O  |         | -14.25 |      | -646.68 | 1.06  |
|      |      |         |        |      |         |       |
|      | slab | -635.11 |        |      | -658.35 | 0.00  |
| RuRh | COOH | -662.39 | 0.63   | 0.12 | -661.88 | -0.14 |

|      |      |         |        |      |         |       |
|------|------|---------|--------|------|---------|-------|
| RuRh | CO   | -651.83 | 0.22   | 0.12 | -651.74 | -0.67 |
| RuRh | CHO  | -655.11 | 0.48   | 0.12 | -654.75 | 0.39  |
| RuRh | CH2O | -658.44 | 0.80   | 0.15 | -657.79 | 0.36  |
| RuRh | CH3O | -662.37 | 1.10   | 0.19 | -661.46 | -0.27 |
| RuRh | O    | -642.10 | 0.08   | 0.05 | -642.07 | -1.25 |
| RuRh | OH   | -646.26 | 0.36   | 0.09 | -645.99 | -0.52 |
| RuRh | H2O  |         | -14.25 |      | -649.36 | 0.03  |

Table S12. The free energy ( $\Delta G/eV$ ) of electrocatalytic CO<sub>2</sub> reduction on TM1/TM2-N@Gra to generate CH<sub>4</sub> (Path2: CO<sub>2</sub>-\*COOH-\*CO-\*CHO-\*CHOH-\*CH-\*CH<sub>2</sub>-\*CH<sub>3</sub>-\*CH<sub>4</sub>).

| metal | molecules | E0      | E_ZPE   | T*S  | $\Delta E /eV$ | $\Delta G/eV$ |
|-------|-----------|---------|---------|------|----------------|---------------|
|       | slab      | -632.18 | -632.17 |      | -655.41        | 0.00          |
| AlRh  | COOH      | -660.88 | 0.65    | 0.14 | -660.36        | -1.55         |
| AlRh  | CO        | -649.32 | 0.22    | 0.11 | -649.21        | 0.33          |
| AlRh  | CHO       | -653.46 | 0.50    | 0.09 | -653.05        | -0.44         |
| AlRh  | CHOH      | -655.35 | 0.75    | 0.17 | -654.77        | 1.67          |
| AlRh  | CH        | -644.29 | 0.36    | 0.05 | -643.98        | -0.03         |
| AlRh  | CH2       | -649.02 | 0.66    | 0.06 | -648.43        | -1.05         |
| AlRh  | CH3       | -653.52 | 0.96    | 0.10 | -652.67        | -0.84         |
| AlRh  | CH4       | -656.35 | 1.21    | 0.18 | -655.33        | 0.74          |
|       | slab      | -633.17 |         |      | -656.40        | 0.00          |
| Allr  | COOH      | -662.20 | 0.64    | 0.10 | -661.66        | -1.86         |
| Allr  | CO        | -650.82 | 0.22    | 0.06 | -650.66        | 0.18          |
| Allr  | CHO       | -654.81 | 0.52    | 0.08 | -654.37        | -0.31         |
| Allr  | CHOH      | -656.96 | 0.78    | 0.14 | -656.32        | 1.45          |
| Allr  | CH        | -645.67 | 0.37    | 0.04 | -645.33        | 0.17          |
| Allr  | CH2       | -650.30 | 0.66    | 0.06 | -649.71        | -0.97         |
| Allr  | CH3       | -654.65 | 0.95    | 0.11 | -653.81        | -0.70         |
| Allr  | CH4       | -657.35 | 1.21    | 0.23 | -656.37        | 0.84          |
|       | slab      | -631.92 |         |      | -655.16        | 0.00          |
| AlPt  | COOH      | -659.26 | 0.67    | 0.13 | -658.72        | -0.17         |
| AlPt  | CO        | -647.66 | 0.21    | 0.08 | -647.52        | 0.38          |
| AlPt  | CHO       | -651.74 | 0.52    | 0.07 | -651.29        | -0.36         |
| AlPt  | CHOH      | -653.84 | 0.78    | 0.10 | -653.16        | 1.53          |
| AlPt  | CH        | -642.82 | 0.35    | 0.05 | -642.52        | -0.18         |
| AlPt  | CH2       | -648.27 | 0.68    | 0.05 | -647.65        | -1.73         |
| AlPt  | CH3       | -652.05 | 0.95    | 0.08 | -651.19        | -0.14         |
| AlPt  | CH4       | -656.08 | 1.20    | 0.13 | -655.01        | -0.42         |
|       | slab      | -630.93 |         |      | -654.17        | 0.00          |
| AlPd  | COOH      | -658.13 | 0.63    | 0.11 | -657.62        | -0.05         |
| AlPd  | CO        | -646.86 | 0.22    | 0.07 | -646.72        | 0.08          |
| AlPd  | CHO       | -650.50 | 0.48    | 0.06 | -650.08        | 0.03          |
| AlPd  | CHOH      | -652.96 | 0.77    | 0.13 | -652.32        | 1.17          |
| AlPd  | CH        | -641.72 | 0.34    | 0.06 | -641.43        | 0.06          |
| AlPd  | CH2       | -647.24 | 0.67    | 0.06 | -646.62        | -1.79         |
| AlPd  | CH3       | -651.10 | 0.93    | 0.13 | -650.29        | -0.27         |

|      |      |         |      |      |         |       |
|------|------|---------|------|------|---------|-------|
| AIPd | CH4  | -655.11 | 1.23 | 0.18 | -654.05 | -0.36 |
|      | slab | -638.27 |      |      | -661.50 | 0.00  |
| VRu  | COOH | -666.12 | 0.64 | 0.10 | -665.59 | -0.68 |
| VRu  | CO   | -655.12 | 0.23 | 0.09 | -654.98 | -0.21 |
| VRu  | CHO  | -658.70 | 0.48 | 0.12 | -658.34 | 0.04  |
| VRu  | CHOH | -661.08 | 0.80 | 0.15 | -660.43 | 1.31  |
| VRu  | CH   | -650.79 | 0.36 | 0.05 | -650.48 | -0.86 |
| VRu  | CH2  | -655.14 | 0.66 | 0.07 | -654.56 | -0.68 |
| VRu  | CH3  | -658.87 | 0.93 | 0.09 | -658.02 | -0.06 |
| VRu  | CH4  | -662.44 | 1.20 | 0.14 | -661.38 | 0.04  |
|      | slab | -634.50 |      |      | -657.73 | 0.00  |
| VPd  | COOH | -661.69 | 0.64 | 0.15 | -661.21 | -0.08 |
| VPd  | CO   | -650.51 | 0.20 | 0.11 | -650.42 | -0.03 |
| VPd  | CHO  | -654.41 | 0.49 | 0.10 | -654.02 | -0.20 |
| VPd  | CHOH | -657.62 | 0.79 | 0.12 | -656.95 | 0.47  |
| VPd  | CH   | -646.26 | 0.36 | 0.05 | -645.95 | 0.18  |
| VPd  | CH2  | -650.93 | 0.65 | 0.07 | -650.35 | -1.00 |
| VPd  | CH3  | -654.71 | 0.95 | 0.09 | -653.85 | -0.10 |
| VPd  | CH4  | -658.66 | 1.22 | 0.14 | -657.58 | -0.33 |
|      | slab | -636.26 |      |      | -659.50 | 0.00  |
| CrNi | COOH | -663.14 | 0.64 | 0.11 | -662.61 | 0.29  |
| CrNi | CO   | -652.40 | 0.22 | 0.10 | -652.28 | -0.49 |
| CrNi | CHO  | -655.73 | 0.50 | 0.12 | -655.35 | 0.33  |
| CrNi | CHOH | -659.34 | 0.81 | 0.11 | -658.64 | 0.11  |
| CrNi | CH   | -647.90 | 0.25 | 0.01 | -647.66 | 0.16  |
| CrNi | CH2  | -652.57 | 0.66 | 0.06 | -651.97 | -0.91 |
| CrNi | CH3  | -656.48 | 0.94 | 0.13 | -655.67 | -0.30 |
| CrNi | CH4  | -660.46 | 1.21 | 0.25 | -659.49 | -0.42 |
|      | slab | -636.98 |      |      | -660.22 | 0.00  |
| CrRh | COOH | -663.67 | 0.61 | 0.10 | -663.17 | 0.45  |
| CrRh | CO   | -652.91 | 0.22 | 0.10 | -652.80 | -0.45 |
| CrRh | CHO  | -656.77 | 0.49 | 0.10 | -656.38 | -0.18 |
| CrRh | CHOH | -660.27 | 0.79 | 0.09 | -659.58 | 0.20  |
| CrRh | CH   | -649.15 | 0.36 | 0.05 | -648.85 | -0.08 |
| CrRh | CH2  | -653.64 | 0.67 | 0.05 | -653.03 | -0.78 |
| CrRh | CH3  | -657.41 | 0.93 | 0.09 | -656.57 | -0.14 |
| CrRh | CH4  | -661.19 | 1.21 | 0.17 | -660.16 | -0.19 |
|      | slab | -636.54 |      |      | -659.78 | 0.00  |
| MnRh | COOH | -664.14 | 0.64 | 0.16 | -663.65 | -0.47 |
| MnRh | CO   | -653.60 | 0.22 | 0.09 | -653.46 | -0.63 |
| MnRh | CHO  | -656.82 | 0.50 | 0.10 | -656.43 | 0.43  |
| MnRh | CHOH | -660.20 | 0.80 | 0.15 | -659.55 | 0.28  |
| MnRh | CH   | -648.74 | 0.37 | 0.05 | -648.42 | 0.31  |
| MnRh | CH2  | -653.46 | 0.67 | 0.06 | -652.85 | -1.03 |
| MnRh | CH3  | -657.28 | 0.95 | 0.07 | -656.40 | -0.15 |
| MnRh | CH4  | -660.73 | 1.20 | 0.19 | -659.72 | 0.08  |
|      | slab | -637.80 |      |      | -661.04 | 0.00  |

|      |      |         |      |      |         |       |
|------|------|---------|------|------|---------|-------|
| MnIr | COOH | -665.52 | 0.66 | 0.14 | -665.00 | -0.56 |
| MnIr | CO   | -654.89 | 0.21 | 0.13 | -654.82 | -0.63 |
| MnIr | CHO  | -658.18 | 0.52 | 0.10 | -657.76 | 0.45  |
| MnIr | CHOH | -661.56 | 0.80 | 0.13 | -660.88 | 0.28  |
| MnIr | CH   | -650.17 | 0.37 | 0.05 | -649.84 | 0.21  |
| MnIr | CH2  | -654.84 | 0.68 | 0.05 | -654.21 | -0.96 |
| MnIr | CH3  | -658.56 | 0.96 | 0.06 | -657.66 | -0.05 |
| MnIr | CH4  | -662.00 | 1.21 | 0.13 | -660.93 | 0.12  |
|      | slab | -629.93 |      |      | -653.16 | 0.00  |
| ZnRu | COOH | -657.95 | 0.65 | 0.14 | -657.44 | -0.88 |
| ZnRu | CO   | -647.09 | 0.23 | 0.09 | -646.96 | -0.33 |
| ZnRu | CHO  | -650.56 | 0.50 | 0.09 | -650.15 | 0.21  |
| ZnRu | CHOH | -653.00 | 0.80 | 0.12 | -652.32 | 1.23  |
| ZnRu | CH   | -642.08 | 0.36 | 0.06 | -641.78 | -0.28 |
| ZnRu | CH2  | -646.59 | 0.67 | 0.06 | -645.97 | -0.79 |
| ZnRu | CH3  | -650.60 | 0.95 | 0.10 | -649.75 | -0.38 |
| ZnRu | CH4  | -654.08 | 1.23 | 0.27 | -653.13 | 0.02  |
|      | slab | -627.68 |      |      | -650.91 | 0.00  |
| ZnPt | COOH | -655.04 | 0.65 | 0.13 | -654.51 | -0.20 |
| ZnPt | CO   | -644.29 | 0.23 | 0.09 | -644.15 | -0.45 |
| ZnPt | CHO  | -647.55 | 0.50 | 0.10 | -647.14 | 0.41  |
| ZnPt | CHOH | -650.35 | 0.82 | 0.12 | -649.65 | 0.89  |
| ZnPt | CH   | -638.32 | 0.35 | 0.07 | -638.04 | 0.79  |
| ZnPt | CH2  | -643.26 | 0.66 | 0.07 | -642.68 | -1.24 |
| ZnPt | CH3  | -647.32 | 0.93 | 0.05 | -646.44 | -0.36 |
| ZnPt | CH4  | -652.07 | 1.17 | 0.07 | -650.97 | -1.14 |
|      | slab | -632.43 |      |      | -655.66 | 0.00  |
| NbAg | COOH | -659.42 | 0.65 | 0.15 | -658.92 | 0.15  |
| NbAg | CO   | -648.44 | 0.21 | 0.11 | -648.35 | -0.25 |
| NbAg | CHO  | -651.86 | 0.46 | 0.11 | -651.50 | 0.25  |
| NbAg | CHOH | -655.20 | 0.78 | 0.14 | -654.57 | 0.34  |
| NbAg | CH   | -644.23 | 0.35 | 0.06 | -643.95 | -0.20 |
| NbAg | CH2  | -648.67 | 0.60 | 0.11 | -648.18 | -0.83 |
| NbAg | CH3  | -652.99 | 0.92 | 0.10 | -652.16 | -0.58 |
| NbAg | CH4  | -656.66 | 1.22 | 0.20 | -655.64 | -0.08 |
|      | slab | -635.11 |      |      | -658.35 | 0.00  |
| RuRh | COOH | -662.39 | 0.63 | 0.12 | -661.88 | -0.14 |
| RuRh | CO   | -651.83 | 0.22 | 0.12 | -651.74 | -0.67 |
| RuRh | CHO  | -655.11 | 0.48 | 0.12 | -654.75 | 0.39  |
| RuRh | CHOH | -658.21 | 0.80 | 0.14 | -657.56 | 0.59  |
| RuRh | CH   | -647.51 | 0.38 | 0.04 | -647.18 | -0.44 |
| RuRh | CH2  | -651.77 | 0.67 | 0.07 | -651.17 | -0.58 |
| RuRh | CH3  | -655.80 | 0.94 | 0.10 | -654.97 | -0.40 |
| RuRh | CH4  | -659.26 | 1.21 | 0.16 | -658.22 | 0.15  |

Table S13. The free energy ( $\Delta G/eV$ ) of electrocatalytic CO<sub>2</sub> reduction on TM1/TM2-N@Gra to generate CH<sub>4</sub> (Path3: CO<sub>2</sub>-\*COOH-\*CO - \* CHO -\*CH<sub>2</sub>O-\*CH<sub>2</sub>OH-\*CH<sub>2</sub>-\*CH<sub>3</sub>-\*CH<sub>4</sub>).

| metal | molecules | E0      | E_ZPE   | T*S  | $\Delta E$ /eV | $\Delta G$ /eV |
|-------|-----------|---------|---------|------|----------------|----------------|
|       | slab      | -632.18 | -632.17 |      | -655.41        | 0.00           |
| AIRh  | COOH      | -660.88 | 0.65    | 0.14 | -660.36        | -1.55          |
| AIRh  | CO        | -649.32 | 0.22    | 0.11 | -649.21        | 0.33           |
| AIRh  | CHO       | -653.46 | 0.50    | 0.09 | -653.05        | -0.44          |
| AIRh  | CH2O      | -656.81 | 0.79    | 0.12 | -656.14        | 0.31           |
| AIRh  | CH2OH     | -660.39 | 1.10    | 0.13 | -659.43        | 0.11           |
| AIRh  | CH2       | -649.02 | 0.66    | 0.06 | -648.43        | 0.18           |
| AIRh  | CH3       | -653.52 | 0.96    | 0.10 | -652.67        | -0.84          |
| AIRh  | CH4       | -656.35 | 1.21    | 0.18 | -655.33        | 0.74           |
|       | slab      | -631.92 |         |      | -655.16        | 0.00           |
| AIPt  | COOH      | -659.26 | 0.67    | 0.13 | -658.72        | -0.17          |
| AIPt  | CO        | -647.66 | 0.21    | 0.08 | -647.52        | 0.38           |
| AIPt  | CHO       | -651.74 | 0.52    | 0.07 | -651.29        | -0.36          |
| AIPt  | CH2O      | -656.15 | 0.81    | 0.07 | -655.41        | -0.73          |
| AIPt  | CH2OH     | -659.05 | 1.13    | 0.13 | -658.05        | 0.76           |
| AIPt  | CH2       | -648.27 | 0.68    | 0.05 | -647.65        | -0.42          |
| AIPt  | CH3       | -652.05 | 0.95    | 0.08 | -651.19        | -0.14          |
| AIPt  | CH4       | -656.08 | 1.20    | 0.13 | -655.01        | -0.42          |
|       | slab      | -630.93 |         |      | -654.17        | 0.00           |
| AIPd  | COOH      | -658.13 | 0.63    | 0.11 | -657.62        | -0.05          |
| AIPd  | CO        | -646.86 | 0.22    | 0.07 | -646.72        | 0.08           |
| AIPd  | CHO       | -650.50 | 0.48    | 0.06 | -650.08        | 0.03           |
| AIPd  | CH2O      | -655.10 | 0.81    | 0.10 | -654.39        | -0.90          |
| AIPd  | CH2OH     | -657.82 | 1.11    | 0.14 | -656.85        | 0.94           |
| AIPd  | CH2       | -647.24 | 0.67    | 0.06 | -646.62        | -0.59          |
| AIPd  | CH3       | -651.10 | 0.93    | 0.13 | -650.29        | -0.27          |
| AIPd  | CH4       | -655.11 | 1.23    | 0.18 | -654.05        | -0.36          |
|       | slab      | -638.27 |         |      | -661.50        | 0.00           |
| VRu   | COOH      | -666.12 | 0.64    | 0.10 | -665.59        | -0.68          |
| VRu   | CO        | -655.12 | 0.23    | 0.09 | -654.98        | -0.21          |
| VRu   | CHO       | -658.70 | 0.48    | 0.12 | -658.34        | 0.04           |
| VRu   | CH2O      | -663.01 | 0.80    | 0.13 | -662.33        | -0.59          |
| VRu   | CH2OH     | -665.70 | 1.13    | 0.13 | -664.70        | 1.03           |
| VRu   | CH2       | -655.14 | 0.66    | 0.07 | -654.56        | -0.68          |
| VRu   | CH3       | -658.87 | 0.93    | 0.09 | -658.02        | -0.06          |
| VRu   | CH4       | -662.44 | 1.20    | 0.14 | -661.38        | 0.04           |
|       | slab      | -634.50 |         |      | -657.73        | 0.00           |
| VPd   | COOH      | -661.69 | 0.64    | 0.15 | -661.21        | -0.08          |
| VPd   | CO        | -650.51 | 0.20    | 0.11 | -650.42        | -0.03          |
| VPd   | CHO       | -654.41 | 0.49    | 0.10 | -654.02        | -0.20          |
| VPd   | CH2O      | -659.04 | 0.82    | 0.11 | -658.34        | -0.92          |
| VPd   | CH2OH     | -661.05 | 1.08    | 0.11 | -660.08        | 1.66           |
| VPd   | CH2       | -650.93 | 0.65    | 0.07 | -650.35        | -1.08          |
| VPd   | CH3       | -654.71 | 0.95    | 0.09 | -653.85        | -0.10          |
| VPd   | CH4       | -658.66 | 1.22    | 0.14 | -657.58        | -0.33          |
|       | slab      | -636.26 |         |      | -659.50        | 0.00           |

|      |       |         |      |      |         |       |
|------|-------|---------|------|------|---------|-------|
| CrNi | COOH  | -663.14 | 0.64 | 0.11 | -662.61 | 0.29  |
| CrNi | CO    | -652.40 | 0.22 | 0.10 | -652.28 | -0.49 |
| CrNi | CHO   | -655.73 | 0.50 | 0.12 | -655.35 | 0.33  |
| CrNi | CH2O  | -659.96 | 0.81 | 0.12 | -659.27 | -0.52 |
| CrNi | CH2OH | -662.91 | 1.08 | 0.15 | -661.98 | 0.69  |
| CrNi | CH2   | -652.57 | 0.66 | 0.06 | -651.97 | -0.81 |
| CrNi | CH3   | -656.48 | 0.94 | 0.13 | -655.67 | -0.30 |
| CrNi | CH4   | -660.46 | 1.21 | 0.25 | -659.49 | -0.42 |
|      | slab  | -636.98 |      |      | -660.22 | 0.00  |
| CrRh | COOH  | -663.67 | 0.61 | 0.10 | -663.17 | 0.45  |
| CrRh | CO    | -652.91 | 0.22 | 0.10 | -652.80 | -0.45 |
| CrRh | CHO   | -656.77 | 0.49 | 0.10 | -656.38 | -0.18 |
| CrRh | CH2O  | -661.04 | 0.80 | 0.11 | -660.35 | -0.57 |
| CrRh | CH2OH | -663.80 | 1.08 | 0.15 | -662.87 | 0.88  |
| CrRh | CH2   | -653.64 | 0.67 | 0.05 | -653.03 | -0.98 |
| CrRh | CH3   | -657.41 | 0.93 | 0.09 | -656.57 | -0.14 |
| CrRh | CH4   | -661.19 | 1.21 | 0.17 | -660.16 | -0.19 |
|      | slab  | -636.54 |      |      | -659.78 | 0.00  |
| MnRh | COOH  | -664.14 | 0.64 | 0.16 | -663.65 | -0.47 |
| MnRh | CO    | -653.60 | 0.22 | 0.09 | -653.46 | -0.63 |
| MnRh | CHO   | -656.82 | 0.50 | 0.10 | -656.43 | 0.43  |
| MnRh | CH2O  | -660.58 | 0.80 | 0.12 | -659.90 | -0.07 |
| MnRh | CH2OH | -663.59 | 1.08 | 0.13 | -662.64 | 0.66  |
| MnRh | CH2   | -653.46 | 0.67 | 0.06 | -652.85 | -1.03 |
| MnRh | CH3   | -657.28 | 0.95 | 0.07 | -656.40 | -0.15 |
| MnRh | CH4   | -660.73 | 1.20 | 0.19 | -659.72 | 0.08  |
|      | slab  | -637.80 |      |      | -661.04 | 0.00  |
| MnIr | COOH  | -665.52 | 0.66 | 0.14 | -665.00 | -0.56 |
| MnIr | CO    | -654.89 | 0.21 | 0.13 | -654.82 | -0.63 |
| MnIr | CHO   | -658.18 | 0.52 | 0.10 | -657.76 | 0.45  |
| MnIr | CH2O  | -661.65 | 0.82 | 0.07 | -660.91 | 0.26  |
| MnIr | CH2OH | -664.95 | 1.09 | 0.14 | -664.00 | 0.31  |
| MnIr | CH2   | -654.84 | 0.68 | 0.05 | -654.21 | -1.03 |
| MnIr | CH3   | -658.56 | 0.96 | 0.06 | -657.66 | -0.05 |
| MnIr | CH4   | -662.00 | 1.21 | 0.13 | -660.93 | 0.12  |
|      | slab  | -629.93 |      |      | -653.16 | 0.00  |
| ZnRu | COOH  | -657.95 | 0.65 | 0.14 | -657.44 | -0.88 |
| ZnRu | CO    | -647.09 | 0.23 | 0.09 | -646.96 | -0.33 |
| ZnRu | CHO   | -650.56 | 0.50 | 0.09 | -650.15 | 0.21  |
| ZnRu | CH2O  | -654.00 | 0.81 | 0.10 | -653.29 | 0.26  |
| ZnRu | CH2OH | -657.54 | 1.10 | 0.11 | -656.55 | 0.15  |
| ZnRu | CH2   | -646.59 | 0.67 | 0.06 | -645.97 | -0.25 |
| ZnRu | CH3   | -650.60 | 0.95 | 0.10 | -649.75 | -0.38 |
| ZnRu | CH4   | -654.08 | 1.23 | 0.27 | -653.13 | 0.02  |
|      | slab  | -627.68 |      |      | -650.91 | 0.00  |
| ZnPt | COOH  | -655.04 | 0.65 | 0.13 | -654.51 | -0.20 |
| ZnPt | CO    | -644.29 | 0.23 | 0.09 | -644.15 | -0.45 |

|      |       |         |      |      |         |       |
|------|-------|---------|------|------|---------|-------|
| ZnPt | CHO   | -647.55 | 0.50 | 0.10 | -647.14 | 0.41  |
| ZnPt | CH2O  | -650.67 | 0.79 | 0.13 | -650.02 | 0.52  |
| ZnPt | CH2OH | -654.91 | 1.13 | 0.14 | -653.92 | -0.50 |
| ZnPt | CH2   | -643.26 | 0.66 | 0.07 | -642.68 | 0.42  |
| ZnPt | CH3   | -647.32 | 0.93 | 0.05 | -646.44 | -0.36 |
| ZnPt | CH4   | -652.07 | 1.17 | 0.07 | -650.97 | -1.14 |
|      | slab  | -632.43 |      |      | -655.66 | 0.00  |
| NbAg | COOH  | -659.42 | 0.65 | 0.15 | -658.92 | 0.15  |
| NbAg | CO    | -648.44 | 0.21 | 0.11 | -648.35 | -0.25 |
| NbAg | CHO   | -651.86 | 0.46 | 0.11 | -651.50 | 0.25  |
| NbAg | CH2O  | -656.73 | 0.79 | 0.13 | -656.07 | -1.17 |
| NbAg | CH2OH | -659.54 | 1.09 | 0.12 | -658.57 | 0.90  |
| NbAg | CH2   | -648.67 | 0.60 | 0.11 | -648.18 | -0.43 |
| NbAg | CH3   | -652.99 | 0.92 | 0.10 | -652.16 | -0.58 |
| NbAg | CH4   | -656.66 | 1.22 | 0.20 | -655.64 | -0.08 |
|      | slab  | -635.11 |      |      | -658.35 | 0.00  |
| RuRh | COOH  | -662.39 | 0.63 | 0.12 | -661.88 | -0.14 |
| RuRh | CO    | -651.83 | 0.22 | 0.12 | -651.74 | -0.67 |
| RuRh | CHO   | -655.11 | 0.48 | 0.12 | -654.75 | 0.39  |
| RuRh | CH2O  | -658.44 | 0.80 | 0.15 | -657.79 | 0.36  |
| RuRh | CH2OH | -662.36 | 1.10 | 0.13 | -661.39 | -0.20 |
| RuRh | CH2   | -651.77 | 0.67 | 0.07 | -651.17 | -0.60 |
| RuRh | CH3   | -655.80 | 0.94 | 0.10 | -654.97 | -0.40 |
| RuRh | CH4   | -659.26 | 1.21 | 0.16 | -658.22 | 0.15  |

Table S14. The free energy ( $\Delta G/eV$ ) of electrocatalytic CO<sub>2</sub> reduction on TM1/TM2-N@Gra to generate CH<sub>4</sub> (Path4: CO<sub>2</sub>-\*HCOO-\*HCOOH-\*CHO-\*CHOH-\*CH-\*CH<sub>2</sub>-\*CH<sub>3</sub> -\*CH<sub>4</sub>).

| metal | molecules | E <sub>0</sub> /eV | E_ZPE/eV | T*S  | $\Delta E/eV$ | $\Delta G/eV$ |
|-------|-----------|--------------------|----------|------|---------------|---------------|
|       | COO       | -631.92            |          |      | -655.16       | 0.00          |
| AlPt  | HCOO      | -659.62            | 0.64     | 0.17 | -659.16       | -0.60         |
|       | HCOOH     | -663.18            | 0.93     | 0.16 | -662.41       | 0.15          |
|       | CHO       | -651.74            | 0.52     | 0.07 | -651.29       | 0.30          |
|       | CH2O      | -656.15            | 0.81     | 0.07 | -655.41       | -0.73         |
|       | CH3O      | -659.72            | 1.08     | 0.07 | -658.72       | 0.10          |
|       | O         | -639.44            | 0.09     | 0.03 | -639.38       | -1.30         |
|       | OH        | -643.31            | 0.39     | 0.05 | -642.97       | -0.19         |
|       | H2O       |                    | -14.25   |      | -646.17       | 0.20          |
|       | COO       | -630.93            |          |      | -654.17       | 0.00          |
| AlPd  | HCOO      | -658.77            | 0.62     | 0.15 | -658.30       | -0.73         |
|       | HCOOH     | -662.20            | 0.96     | 0.13 | -661.37       | 0.34          |
|       | HCOOH     |                    |          |      | -660.73       | 0.63          |
|       |           |                    |          |      |               |               |
|       | COO       | -634.50            |          |      | -657.73       | 0.00          |
| VPd   | HCOO      | -662.60            | 0.62     | 0.18 | -662.15       | -1.02         |
|       | HCOOH     | -665.43            | 0.93     | 0.17 | -664.67       | 0.88          |
|       | CHO       | -654.41            | 0.49     | 0.10 | -654.02       | -0.17         |



|      |       |         |      |      |         |       |
|------|-------|---------|------|------|---------|-------|
|      | CHOH  | -657.62 | 0.79 | 0.12 | -656.95 | 0.47  |
|      | CH    | -646.26 | 0.36 | 0.05 | -645.95 | 0.18  |
|      | CH2   | -650.93 | 0.65 | 0.07 | -650.35 | -1.00 |
|      | CH3   | -654.71 | 0.95 | 0.09 | -653.85 | -0.10 |
|      | CH4   | -658.66 | 1.22 | 0.14 | -657.58 | -0.33 |
|      | COO   | -636.26 |      |      | -659.50 | 0.00  |
| CrNi | HCOO  | -663.42 | 0.60 | 0.15 | -662.97 | -0.07 |
|      | HCOOH | -667.00 | 0.91 | 0.15 | -666.24 | 0.13  |
|      | CHO   | -655.73 | 0.50 | 0.12 | -655.35 | 0.07  |
|      | CHOH  | -659.34 | 0.81 | 0.11 | -658.64 | 0.11  |
|      | CH    | -647.90 | 0.25 | 0.01 | -647.66 | 0.16  |
|      | CH2   | -652.57 | 0.66 | 0.06 | -651.97 | -0.91 |
|      | CH3   | -656.48 | 0.94 | 0.13 | -655.67 | -0.30 |
|      | CH4   | -660.46 | 1.21 | 0.25 | -659.49 | -0.42 |
|      | COO   | -636.98 |      |      | -660.22 | 0.00  |
| CrRh | HCOO  | -664.18 | 0.62 | 0.18 | -663.74 | -0.12 |
|      | HCOOH | -667.42 | 0.92 | 0.20 | -666.69 | 0.45  |
|      | CHO   | -656.77 | 0.49 | 0.10 | -656.38 | -0.51 |
|      | CHOH  | -660.27 | 0.79 | 0.09 | -659.58 | 0.20  |
|      | CH    | -649.15 | 0.36 | 0.05 | -648.85 | -0.08 |
|      | CH2   | -653.64 | 0.67 | 0.05 | -653.03 | -0.78 |
|      | CH3   | -657.41 | 0.93 | 0.09 | -656.57 | -0.14 |
|      | CH4   | -661.19 | 1.21 | 0.17 | -660.16 | -0.19 |
|      | COO   | -632.43 |      |      | -655.66 | 0.00  |
| NbAg | HCOO  | -660.09 | 0.59 | 0.13 | -659.62 | -0.56 |
|      | HCOOH | -663.19 | 0.90 | 0.15 | -662.44 | 0.58  |
|      | CHO   | -651.86 | 0.46 | 0.11 | -651.50 | 0.12  |
|      | CHOH  | -655.20 | 0.78 | 0.14 | -654.56 | 0.34  |
|      | CH    | -644.23 | 0.35 | 0.06 | -643.95 | -0.20 |
|      | CH2   | -648.67 | 0.60 | 0.11 | -648.18 | -0.83 |
|      | CH3   | -652.99 | 0.92 | 0.10 | -652.16 | -0.58 |
|      | CH4   | -656.66 | 1.22 | 0.20 | -655.64 | -0.08 |

Table S15. Adsorption energy of potential product on diatomic catalyst surface.

| Metal | CO    | HCOOH | CH3OH  | CH4   |
|-------|-------|-------|--------|-------|
| AlRh  | -1.87 | -1.84 | -1.16  | -0.13 |
| AlPd  | -0.66 | -1.47 | -0.91  | -0.13 |
| AlPt  | -0.47 | -1.46 | -0.86  | -0.12 |
| VRu   | -1.58 | -1.75 | -0.87  | -0.13 |
| VPd   | -0.74 | -1.13 | -0.34  | -0.12 |
| CrNi  | -0.87 | -0.94 | -0.25  | -0.15 |
| CrRh  | -0.66 | -0.63 | -0.24  | -0.17 |
| MnRh  | -1.78 | -1.23 | -0.74  | -0.15 |
| MnIr  | -1.82 | -1.02 | -0.28  | -0.16 |
| ZnRu  | -1.89 | -1.31 | 660.15 | -0.11 |
| ZnPt  | -1.34 | -0.40 | -0.59  | -0.35 |
| NbAg  | -0.74 | -0.97 | -0.76  | -0.19 |

|      |       |       |       |       |
|------|-------|-------|-------|-------|
| RuRh | -1.45 | -0.30 | -0.32 | -0.11 |
| AlIr | -2.38 | -1.98 |       | -0.14 |

Table S16. The free energy ( $\Delta G/eV$ ) of electrocatalytic  $CO_2$  reduction on TM1/TM2-N@Gra to generate  $CH_3OH$  (Path1:  $CO_2 \rightarrow COOH \rightarrow CO \rightarrow CHO \rightarrow CHOH \rightarrow CH_2OH \rightarrow CH_3OH$ ).

| metal | molecules          | $E_0/eV$ | $E_{ZPE}/eV$ | T*S  | $\Delta E/eV$ | $\Delta G/eV$ |
|-------|--------------------|----------|--------------|------|---------------|---------------|
|       |                    | -632.18  | -632.18      |      | -655.41       | 0.00          |
| AlRh  | COOH               | -660.88  | 0.65         | 0.14 | -660.36       | -1.55         |
| AlRh  | CO                 | -649.32  | 0.22         | 0.11 | -649.21       | 0.33          |
| AlRh  | CHO                | -653.46  | 0.50         | 0.09 | -653.05       | -0.44         |
| AlRh  | CHOH               | -655.35  | 0.75         | 0.17 | -654.77       | 1.67          |
| AlRh  | CH <sub>2</sub> OH | -660.39  | 1.10         | 0.13 | -659.43       | -1.25         |
| AlRh  | CH <sub>3</sub> OH | -663.56  | 1.45         | 0.21 | -662.32       | 0.50          |
|       |                    | -631.92  |              |      | -655.16       | 0.00          |
| AlPt  | COOH               | -659.26  | 0.67         | 0.13 | -658.72       | -0.17         |
| AlPt  | CO                 | -647.66  | 0.21         | 0.07 | -647.52       | 0.38          |
| AlPt  | CHO                | -651.74  | 0.52         | 0.07 | -651.29       | -0.36         |
| AlPt  | CHOH               | -653.84  | 0.78         | 0.10 | -653.16       | 1.53          |
| AlPt  | CH <sub>2</sub> OH | -659.05  | 1.13         | 0.13 | -658.05       | -1.49         |
| AlPt  | CH <sub>3</sub> OH | -663.00  | 1.44         | 0.22 | -661.78       | -0.33         |
|       |                    | -630.93  |              |      | -654.17       | 0.00          |
| AlPd  | COOH               | -658.13  | 0.63         | 0.11 | -657.62       | -0.05         |
| AlPd  | CO                 | -646.86  | 0.22         | 0.07 | -646.72       | 0.08          |
| AlPd  | CHO                | -650.50  | 0.48         | 0.06 | -650.08       | 0.03          |
| AlPd  | CHOH               | -652.96  | 0.77         | 0.13 | -652.32       | 1.17          |
| AlPd  | CH <sub>2</sub> OH | -657.82  | 1.11         | 0.14 | -656.85       | -1.13         |
| AlPd  | CH <sub>3</sub> OH | -662.07  | 1.43         | 0.23 | -660.87       | -0.62         |
|       |                    | -638.27  |              |      | -661.50       | 0.00          |
| VRu   | COOH               | -666.12  | 0.64         | 0.10 | -665.59       | -0.68         |
| VRu   | CO                 | -655.12  | 0.23         | 0.09 | -654.98       | -0.21         |
| VRu   | CHO                | -658.70  | 0.48         | 0.12 | -658.34       | 0.04          |
| VRu   | CHOH               | -661.08  | 0.80         | 0.15 | -660.43       | 1.31          |
| VRu   | CH <sub>2</sub> OH | -665.70  | 1.13         | 0.13 | -664.70       | -0.87         |
| VRu   | CH <sub>3</sub> OH | -669.36  | 1.44         | 0.21 | -668.13       | -0.03         |
|       |                    | -634.50  |              |      | -657.73       | 0.00          |
| VPd   | COOH               | -661.69  | 0.64         | 0.15 | -661.21       | -0.08         |
| VPd   | CO                 | -650.51  | 0.20         | 0.11 | -650.42       | -0.03         |
| VPd   | CHO                | -654.41  | 0.49         | 0.10 | -654.02       | -0.20         |
| VPd   | CHOH               | -657.62  | 0.79         | 0.12 | -656.95       | 0.47          |
| VPd   | CH <sub>2</sub> OH | -661.05  | 1.08         | 0.11 | -660.08       | 0.27          |
| VPd   | CH <sub>3</sub> OH | -665.06  | 1.40         | 0.24 | -663.90       | -0.42         |
|       |                    | -636.26  |              |      | -659.50       | 0.00          |
| CrNi  | COOH               | -663.14  | 0.64         | 0.11 | -662.61       | 0.29          |

|      |       |         |      |      |         |       |
|------|-------|---------|------|------|---------|-------|
| CrNi | CO    | -652.40 | 0.22 | 0.10 | -652.28 | -0.49 |
| CrNi | CHO   | -655.73 | 0.50 | 0.12 | -655.35 | 0.33  |
| CrNi | CHOH  | -659.34 | 0.81 | 0.11 | -658.64 | 0.11  |
| CrNi | CH2OH | -662.91 | 1.08 | 0.15 | -661.98 | 0.06  |
| CrNi | CH3OH | -666.73 | 1.39 | 0.22 | -665.56 | -0.18 |
|      |       | -636.98 |      |      | -660.22 | 0.00  |
| CrRh | COOH  | -663.67 | 0.61 | 0.10 | -663.17 | 0.45  |
| CrRh | CO    | -652.91 | 0.22 | 0.10 | -652.80 | -0.45 |
| CrRh | CHO   | -656.77 | 0.49 | 0.10 | -656.38 | -0.18 |
| CrRh | CHOH  | -660.27 | 0.79 | 0.09 | -659.58 | 0.20  |
| CrRh | CH2OH | -663.80 | 1.08 | 0.15 | -662.87 | 0.11  |
| CrRh | CH3OH | -667.44 | 1.39 | 0.25 | -666.31 | -0.04 |
|      |       | -636.54 |      |      | -659.78 | 0.00  |
| MnRh | COOH  | -664.14 | 0.64 | 0.16 | -663.65 | -0.47 |
| MnRh | CO    | -653.59 | 0.22 | 0.09 | -653.46 | -0.63 |
| MnRh | CHO   | -656.82 | 0.50 | 0.10 | -656.43 | 0.43  |
| MnRh | CHOH  | -660.20 | 0.80 | 0.15 | -659.55 | 0.28  |
| MnRh | CH2OH | -663.59 | 1.08 | 0.13 | -662.64 | 0.31  |
| MnRh | CH3OH | -667.50 | 1.42 | 0.14 | -666.23 | -0.19 |
|      |       | -637.80 |      |      | -661.04 | 0.00  |
| MnIr | COOH  | -665.52 | 0.66 | 0.14 | -665.00 | -0.56 |
| MnIr | CO    | -654.89 | 0.21 | 0.13 | -654.82 | -0.63 |
| MnIr | CHO   | -658.18 | 0.52 | 0.10 | -657.76 | 0.45  |
| MnIr | CHOH  | -661.56 | 0.80 | 0.13 | -660.88 | 0.28  |
| MnIr | CH2OH | -664.95 | 1.09 | 0.14 | -664.00 | 0.28  |
| MnIr | CH3OH | -668.30 | 1.39 | 0.20 | -667.11 | 0.29  |
|      |       | -629.93 |      |      | -653.16 | 0.00  |
| ZnRu | COOH  | -657.95 | 0.65 | 0.14 | -657.44 | -0.88 |
| ZnRu | CO    | -647.09 | 0.23 | 0.09 | -646.96 | -0.33 |
| ZnRu | CHO   | -650.56 | 0.50 | 0.09 | -650.15 | 0.20  |
| ZnRu | CHOH  | -653.00 | 0.80 | 0.12 | -652.32 | 1.23  |
| ZnRu | CH2OH | -657.54 | 1.10 | 0.11 | -656.55 | -0.82 |
| ZnRu | CH3OH | -660.78 | 1.40 | 0.12 | -659.50 | 0.45  |
|      |       | -627.68 |      |      | -650.92 | 0.00  |
| ZnPt | COOH  | -655.04 | 0.65 | 0.13 | -654.51 | -0.20 |
| ZnPt | CO    | -644.29 | 0.23 | 0.09 | -644.15 | -0.45 |
| ZnPt | CHO   | -647.55 | 0.50 | 0.10 | -647.14 | 0.41  |
| ZnPt | CHOH  | -650.35 | 0.82 | 0.12 | -649.65 | 0.89  |
| ZnPt | CH2OH | -654.91 | 1.13 | 0.14 | -653.92 | -0.87 |
| ZnPt | CH3OH | -658.49 | 1.42 | 0.20 | -657.27 | 0.06  |
|      |       | -632.43 |      |      | -655.66 | 0.00  |
| NbAg | COOH  | -659.42 | 0.65 | 0.15 | -658.92 | 0.15  |
| NbAg | CO    | -648.44 | 0.21 | 0.11 | -648.35 | -0.25 |
| NbAg | CHO   | -651.86 | 0.46 | 0.11 | -651.50 | 0.25  |
| NbAg | CHOH  | -655.20 | 0.78 | 0.14 | -654.57 | 0.34  |
| NbAg | CH2OH | -659.54 | 1.09 | 0.12 | -658.57 | -0.60 |
| NbAg | CH3OH | -663.41 | 1.44 | 0.21 | -662.18 | -0.21 |

|      |       |         |      |      |         |       |
|------|-------|---------|------|------|---------|-------|
|      |       | -635.11 |      |      | -658.35 | 0.00  |
| RuRh | COOH  | -662.39 | 0.63 | 0.12 | -661.89 | -0.14 |
| RuRh | CO    | -651.83 | 0.22 | 0.12 | -651.74 | -0.67 |
| RuRh | CHO   | -655.11 | 0.48 | 0.12 | -654.75 | 0.39  |
| RuRh | CHOH  | -658.21 | 0.80 | 0.14 | -657.56 | 0.59  |
| RuRh | CH2OH | -662.36 | 1.10 | 0.13 | -661.39 | -0.43 |
| RuRh | CH3OH | -665.65 | 1.38 | 0.20 | -664.47 | 0.31  |

Table S17. The free energy ( $\Delta G/eV$ ) of electrocatalytic  $CO_2$  reduction on TM1/TM2-N@Gra to generate  $CH_3OH$  (Path2:  $CO_2 \rightarrow COOH \rightarrow CO \rightarrow CHO \rightarrow CH_2 \rightarrow CH_2OH \rightarrow CH_3OH$ ).

| metal | molecules | $E_0/eV$ | $E_{ZPE}/eV$ | T*S  | $\Delta E/eV$ | $\Delta G/eV$ |
|-------|-----------|----------|--------------|------|---------------|---------------|
|       |           | -632.18  | -632.18      |      | -655.41       | 0.00          |
| AlRh  | COOH      | -660.88  | 0.65         | 0.14 | -660.36       | -1.55         |
| AlRh  | CO        | -649.32  | 0.22         | 0.11 | -649.21       | 0.33          |
| AlRh  | CHO       | -653.46  | 0.50         | 0.09 | -653.05       | -0.44         |
| AlRh  | CH2O      | -656.81  | 0.79         | 0.12 | -656.14       | 0.31          |
| AlRh  | CH2OH     | -660.39  | 1.10         | 0.13 | -659.43       | 0.11          |
| AlRh  | CH3OH     | -663.56  | 1.45         | 0.21 | -662.32       | 0.50          |
|       |           | -631.92  |              |      | -655.16       | 0.00          |
| AlPt  | COOH      | -659.26  | 0.67         | 0.13 | -658.72       | -0.17         |
| AlPt  | CO        | -647.66  | 0.21         | 0.07 | -647.52       | 0.38          |
| AlPt  | CHO       | -651.74  | 0.52         | 0.07 | -651.29       | -0.36         |
| AlPt  | CH2O      | -656.15  | 0.81         | 0.07 | -655.41       | -0.73         |
| AlPt  | CH2OH     | -659.05  | 1.13         | 0.13 | -658.05       | 0.76          |
| AlPt  | CH3OH     | -663.00  | 1.44         | 0.22 | -661.78       | -0.33         |
|       |           | -630.93  |              |      | -654.17       | 0.00          |
| AlPd  | COOH      | -658.13  | 0.63         | 0.11 | -657.62       | -0.05         |
| AlPd  | CO        | -646.86  | 0.22         | 0.07 | -646.72       | 0.08          |
| AlPd  | CHO       | -650.50  | 0.48         | 0.06 | -650.08       | 0.03          |
| AlPd  | CH2O      | -655.10  | 0.81         | 0.10 | -654.39       | -0.90         |
| AlPd  | CH2OH     | -657.82  | 1.11         | 0.14 | -656.85       | 0.94          |
| AlPd  | CH3OH     | -662.07  | 1.43         | 0.23 | -660.87       | -0.62         |
|       |           | -638.27  |              |      | -661.50       | 0.00          |
| VRu   | COOH      | -666.12  | 0.64         | 0.10 | -665.59       | -0.68         |
| VRu   | CO        | -655.12  | 0.23         | 0.09 | -654.98       | -0.21         |
| VRu   | CHO       | -658.70  | 0.48         | 0.12 | -658.34       | 0.04          |
| VRu   | CH2O      | -663.01  | 0.80         | 0.13 | -662.33       | -0.59         |
| VRu   | CH2OH     | -665.70  | 1.13         | 0.13 | -664.70       | 1.03          |
| VRu   | CH3OH     | -669.36  | 1.44         | 0.21 | -668.13       | -0.03         |
|       |           | -634.50  |              |      | -657.73       | 0.00          |
| VPd   | COOH      | -661.69  | 0.64         | 0.15 | -661.21       | -0.08         |
| VPd   | CO        | -650.51  | 0.20         | 0.11 | -650.42       | -0.03         |
| VPd   | CHO       | -654.41  | 0.49         | 0.10 | -654.02       | -0.20         |
| VPd   | CH2O      | -659.04  | 0.82         | 0.11 | -658.34       | -0.92         |
| VPd   | CH2OH     | -661.05  | 1.08         | 0.11 | -660.08       | 1.66          |
| VPd   | CH3OH     | -665.06  | 1.40         | 0.24 | -663.90       | -0.42         |

|      |       |         |      |      |         |       |
|------|-------|---------|------|------|---------|-------|
|      |       | -636.26 |      |      | -659.50 | 0.00  |
| CrNi | COOH  | -663.14 | 0.64 | 0.11 | -662.61 | 0.29  |
| CrNi | CO    | -652.40 | 0.22 | 0.10 | -652.28 | -0.49 |
| CrNi | CHO   | -655.73 | 0.50 | 0.12 | -655.35 | 0.33  |
| CrNi | CH2O  | -659.96 | 0.81 | 0.12 | -659.27 | -0.52 |
| CrNi | CH2OH | -662.91 | 1.08 | 0.15 | -661.98 | 0.69  |
| CrNi | CH3OH | -666.73 | 1.39 | 0.22 | -665.56 | -0.18 |
|      |       | -636.98 |      |      | -660.22 | 0.00  |
| CrRh | COOH  | -663.67 | 0.61 | 0.10 | -663.17 | 0.45  |
| CrRh | CO    | -652.91 | 0.22 | 0.10 | -652.80 | -0.45 |
| CrRh | CHO   | -656.77 | 0.49 | 0.10 | -656.38 | -0.18 |
| CrRh | CH2O  | -661.04 | 0.80 | 0.11 | -660.35 | -0.57 |
| CrRh | CH2OH | -663.80 | 1.08 | 0.15 | -662.87 | 0.88  |
| CrRh | CH3OH | -667.44 | 1.39 | 0.25 | -666.31 | -0.04 |
|      |       | -636.54 |      |      | -659.78 | 0.00  |
| MnRh | COOH  | -664.14 | 0.64 | 0.16 | -663.65 | -0.47 |
| MnRh | CO    | -653.59 | 0.22 | 0.09 | -653.46 | -0.63 |
| MnRh | CHO   | -656.82 | 0.50 | 0.10 | -656.43 | 0.43  |
| MnRh | CH2O  | -660.58 | 0.80 | 0.12 | -659.90 | -0.07 |
| MnRh | CH2OH | -663.59 | 1.08 | 0.13 | -662.64 | 0.66  |
| MnRh | CH3OH | -667.50 | 1.42 | 0.14 | -666.23 | -0.19 |
|      |       | -637.80 |      |      | -661.04 | 0.00  |
| MnIr | COOH  | -665.52 | 0.66 | 0.14 | -665.00 | -0.56 |
| MnIr | CO    | -654.89 | 0.21 | 0.13 | -654.82 | -0.63 |
| MnIr | CHO   | -658.18 | 0.52 | 0.10 | -657.76 | 0.45  |
| MnIr | CH2O  | -661.65 | 0.82 | 0.07 | -660.91 | 0.26  |
| MnIr | CH2OH | -664.95 | 1.09 | 0.14 | -664.00 | 0.31  |
| MnIr | CH3OH | -668.30 | 1.39 | 0.20 | -667.11 | 0.29  |
|      |       | -629.93 |      |      | -653.16 | 0.00  |
| ZnRu | COOH  | -657.95 | 0.65 | 0.14 | -657.44 | -0.88 |
| ZnRu | CO    | -647.09 | 0.23 | 0.09 | -646.96 | -0.33 |
| ZnRu | CHO   | -650.56 | 0.50 | 0.09 | -650.15 | 0.20  |
| ZnRu | CH2O  | -654.00 | 0.81 | 0.10 | -653.30 | 0.26  |
| ZnRu | CH2OH | -657.54 | 1.10 | 0.11 | -656.55 | 0.15  |
| ZnRu | CH3OH | -660.78 | 1.40 | 0.12 | -659.50 | 0.45  |
|      |       | -627.68 |      |      | -650.92 | 0.00  |
| ZnPt | COOH  | -655.04 | 0.65 | 0.13 | -654.51 | -0.20 |
| ZnPt | CO    | -644.29 | 0.23 | 0.09 | -644.15 | -0.45 |
| ZnPt | CHO   | -647.55 | 0.50 | 0.10 | -647.14 | 0.41  |
| ZnPt | CH2O  | -650.67 | 0.79 | 0.13 | -650.02 | 0.52  |
| ZnPt | CH2OH | -654.91 | 1.13 | 0.14 | -653.92 | -0.50 |
| ZnPt | CH3OH | -658.49 | 1.42 | 0.20 | -657.27 | 0.06  |
|      |       | -632.43 |      |      | -655.66 | 0.00  |
| NbAg | COOH  | -659.42 | 0.65 | 0.15 | -658.92 | 0.15  |
| NbAg | CO    | -648.44 | 0.21 | 0.11 | -648.35 | -0.25 |
| NbAg | CHO   | -651.86 | 0.46 | 0.11 | -651.50 | 0.25  |
| NbAg | CH2O  | -656.73 | 0.79 | 0.13 | -656.07 | -1.17 |

|      |       |         |      |      |         |       |
|------|-------|---------|------|------|---------|-------|
| NbAg | CH2OH | -659.54 | 1.09 | 0.12 | -658.57 | 0.90  |
| NbAg | CH3OH | -663.41 | 1.44 | 0.21 | -662.18 | -0.21 |
|      |       | -635.11 |      |      | -658.35 | 0.00  |
| RuRh | COOH  | -662.39 | 0.63 | 0.12 | -661.89 | -0.14 |
| RuRh | CO    | -651.83 | 0.22 | 0.12 | -651.74 | -0.67 |
| RuRh | CHO   | -655.11 | 0.48 | 0.12 | -654.75 | 0.39  |
| RuRh | CH2O  | -658.44 | 0.80 | 0.15 | -657.79 | 0.36  |
| RuRh | CH2OH | -662.36 | 1.10 | 0.13 | -661.39 | -0.20 |
| RuRh | CH3OH | -665.65 | 1.38 | 0.20 | -664.47 | 0.31  |

Table S18. The free energy ( $\Delta G/eV$ ) of electrocatalytic CO<sub>2</sub> reduction on TM1/TM2-N@Gra to generate CH<sub>3</sub>OH (Path3: CO<sub>2</sub>-\*COOH-\*CO-\*CHO-\*CH<sub>2</sub>-\*CH<sub>3</sub> -\*CH<sub>3</sub>OH).

| metal | molecules | E <sub>0</sub> /eV | E_ZPE/eV | T*S  | $\Delta E/eV$ | $\Delta G/eV$ |
|-------|-----------|--------------------|----------|------|---------------|---------------|
|       |           |                    |          |      |               | ▽             |
|       |           | -632.18            | -632.18  |      | -655.41       | 0.00          |
| AlRh  | COOH      | -660.88            | 0.65     | 0.14 | -660.36       | -1.55         |
| AlRh  | CO        | -649.32            | 0.22     | 0.11 | -649.21       | 0.33          |
| AlRh  | CHO       | -653.46            | 0.50     | 0.09 | -653.05       | -0.44         |
| AlRh  | CH2O      | -656.81            | 0.79     | 0.12 | -656.14       | 0.31          |
| AlRh  | CH3O      | -661.09            | 1.11     | 0.20 | -660.17       | -0.63         |
| AlRh  | CH3OH     | -663.56            | 1.45     | 0.21 | -662.32       | 1.25          |
|       |           |                    |          |      |               |               |
|       |           | -631.92            |          |      | -655.16       | 0.00          |
| AlPt  | COOH      | -659.26            | 0.67     | 0.13 | -658.72       | -0.17         |
| AlPt  | CO        | -647.66            | 0.21     | 0.07 | -647.52       | 0.38          |
| AlPt  | CHO       | -651.74            | 0.52     | 0.07 | -651.29       | -0.36         |
| AlPt  | CH2O      | -656.15            | 0.81     | 0.07 | -655.41       | -0.73         |
| AlPt  | CH3O      | -659.72            | 1.08     | 0.07 | -658.72       | 0.10          |
| AlPt  | CH3OH     | -663.00            | 1.44     | 0.22 | -661.78       | 0.34          |
|       |           |                    |          |      |               |               |
|       |           | -630.93            |          |      | -654.17       | 0.00          |
| AlPd  | COOH      | -658.13            | 0.63     | 0.11 | -657.62       | -0.05         |
| AlPd  | CO        | -646.86            | 0.22     | 0.07 | -646.72       | 0.08          |
| AlPd  | CHO       | -650.50            | 0.48     | 0.06 | -650.08       | 0.03          |
| AlPd  | CH2O      | -655.10            | 0.81     | 0.10 | -654.39       | -0.90         |
| AlPd  | CH3O      | -658.97            | 1.11     | 0.19 | -658.05       | -0.26         |
| AlPd  | CH3OH     | -662.07            | 1.43     | 0.23 | -660.87       | 0.58          |
|       |           |                    |          |      |               |               |
|       |           | -638.27            |          |      | -661.50       | 0.00          |
| VRu   | COOH      | -666.12            | 0.64     | 0.10 | -665.59       | -0.68         |
| VRu   | CO        | -655.12            | 0.23     | 0.09 | -654.98       | -0.21         |
| VRu   | CHO       | -658.70            | 0.48     | 0.12 | -658.34       | 0.04          |
| VRu   | CH2O      | -663.01            | 0.80     | 0.13 | -662.33       | -0.59         |
| VRu   | CH3O      | -666.48            | 1.11     | 0.12 | -665.49       | 0.24          |
| VRu   | CH3OH     | -669.36            | 1.44     | 0.21 | -668.13       | 0.76          |
|       |           |                    |          |      |               |               |

|      |       |         |      |      |         |       |
|------|-------|---------|------|------|---------|-------|
|      |       | -634.50 |      |      | -657.73 | 0.00  |
| VPd  | COOH  | -661.69 | 0.64 | 0.15 | -661.21 | -0.08 |
| VPd  | CO    | -650.51 | 0.20 | 0.11 | -650.42 | -0.03 |
| VPd  | CHO   | -654.41 | 0.49 | 0.10 | -654.02 | -0.20 |
| VPd  | CH2O  | -659.04 | 0.82 | 0.11 | -658.34 | -0.92 |
| VPd  | CH3O  | -663.26 | 1.11 | 0.13 | -662.28 | -0.54 |
| VPd  | CH3OH | -665.06 | 1.40 | 0.24 | -663.90 | 1.78  |
|      |       |         |      |      |         |       |
|      |       | -636.26 |      |      | -659.50 | 0.00  |
| CrNi | COOH  | -663.14 | 0.64 | 0.11 | -662.61 | 0.29  |
| CrNi | CO    | -652.40 | 0.22 | 0.10 | -652.28 | -0.49 |
| CrNi | CHO   | -655.73 | 0.50 | 0.12 | -655.35 | 0.33  |
| CrNi | CH2O  | -659.96 | 0.81 | 0.12 | -659.27 | -0.52 |
| CrNi | CH3O  | -663.95 | 1.09 | 0.22 | -663.08 | -0.41 |
| CrNi | CH3OH | -666.73 | 1.39 | 0.22 | -665.56 | 0.92  |
|      |       |         |      |      |         |       |
|      |       | -636.98 |      |      | -660.22 | 0.00  |
| CrRh | COOH  | -663.67 | 0.61 | 0.10 | -663.17 | 0.45  |
| CrRh | CO    | -652.91 | 0.22 | 0.10 | -652.80 | -0.45 |
| CrRh | CHO   | -656.77 | 0.49 | 0.10 | -656.38 | -0.18 |
| CrRh | CH2O  | -661.04 | 0.80 | 0.11 | -660.35 | -0.57 |
| CrRh | CH3O  | -664.62 | 1.08 | 0.11 | -663.65 | 0.09  |
| CrRh | CH3OH | -667.44 | 1.39 | 0.25 | -666.31 | 0.75  |
|      |       |         |      |      |         |       |
|      |       | -636.54 |      |      | -659.78 | 0.00  |
| MnRh | COOH  | -664.14 | 0.64 | 0.16 | -663.65 | -0.47 |
| MnRh | CO    | -653.59 | 0.22 | 0.09 | -653.46 | -0.63 |
| MnRh | CHO   | -656.82 | 0.50 | 0.10 | -656.43 | 0.43  |
| MnRh | CH2O  | -660.58 | 0.80 | 0.12 | -659.90 | -0.07 |
| MnRh | CH3O  | -663.93 | 1.09 | 0.20 | -663.04 | 0.26  |
| MnRh | CH3OH | -667.50 | 1.42 | 0.14 | -666.23 | 0.21  |
|      |       |         |      |      |         |       |
|      |       | -637.80 |      |      | -661.04 | 0.00  |
| MnIr | COOH  | -665.52 | 0.66 | 0.14 | -665.00 | -0.56 |
| MnIr | CO    | -654.89 | 0.21 | 0.13 | -654.82 | -0.63 |
| MnIr | CHO   | -658.18 | 0.52 | 0.10 | -657.76 | 0.45  |
| MnIr | CH2O  | -661.65 | 0.82 | 0.07 | -660.91 | 0.26  |
| MnIr | CH3O  | -664.98 | 1.09 | 0.20 | -664.08 | 0.22  |
| MnIr | CH3OH | -668.30 | 1.39 | 0.20 | -667.11 | 0.37  |
|      |       |         |      |      |         |       |
|      |       | -629.93 |      |      | -653.16 | 0.00  |
| ZnRu | COOH  | -657.95 | 0.65 | 0.14 | -657.44 | -0.88 |
| ZnRu | CO    | -647.09 | 0.23 | 0.09 | -646.96 | -0.33 |
| ZnRu | CHO   | -650.56 | 0.50 | 0.09 | -650.15 | 0.20  |
| ZnRu | CH2O  | -654.00 | 0.81 | 0.10 | -653.30 | 0.26  |
| ZnRu | CH3O  | -657.08 | 1.07 | 0.18 | -656.19 | 0.51  |
| ZnRu | CH3OH | -660.78 | 1.40 | 0.12 | -659.50 | 0.08  |

|      |       |         |      |      |         |       |
|------|-------|---------|------|------|---------|-------|
|      |       | -627.68 |      |      | -650.92 | 0.00  |
| ZnPt | COOH  | -655.04 | 0.65 | 0.13 | -654.51 | -0.20 |
| ZnPt | CO    | -644.29 | 0.23 | 0.09 | -644.15 | -0.45 |
| ZnPt | CHO   | -647.55 | 0.50 | 0.10 | -647.14 | 0.41  |
| ZnPt | CH2O  | -650.67 | 0.79 | 0.13 | -650.02 | 0.52  |
| ZnPt | CH3O  | -654.89 | 1.10 | 0.19 | -653.98 | -0.56 |
| ZnPt | CH3OH | -658.49 | 1.42 | 0.20 | -657.27 | 0.12  |
|      |       |         |      |      |         |       |
|      |       | -632.43 |      |      | -655.66 | 0.00  |
| NbAg | COOH  | -659.42 | 0.65 | 0.15 | -658.92 | 0.15  |
| NbAg | CO    | -648.44 | 0.21 | 0.11 | -648.35 | -0.25 |
| NbAg | CHO   | -651.86 | 0.46 | 0.11 | -651.50 | 0.25  |
| NbAg | CH2O  | -656.73 | 0.79 | 0.13 | -656.07 | -1.17 |
| NbAg | CH3O  | -660.80 | 1.11 | 0.09 | -659.78 | -0.31 |
| NbAg | CH3OH | -663.41 | 1.44 | 0.21 | -662.18 | 1.00  |
|      |       |         |      |      |         |       |
|      |       | -635.11 |      |      | -658.35 | 0.00  |
| RuRh | COOH  | -662.39 | 0.63 | 0.12 | -661.89 | -0.14 |
| RuRh | CO    | -651.83 | 0.22 | 0.12 | -651.74 | -0.67 |
| RuRh | CHO   | -655.11 | 0.48 | 0.12 | -654.75 | 0.39  |
| RuRh | CH2O  | -658.44 | 0.80 | 0.15 | -657.79 | 0.36  |
| RuRh | CH3O  | -662.37 | 1.10 | 0.19 | -661.46 | -0.27 |
| RuRh | CH3OH | -665.65 | 1.38 | 0.20 | -664.47 | 0.39  |
